# Supplementary material for: Initiatives for improving delayed discharge from a hospital setting: a scoping review
Source: PubMed Central journal article supplement — BMJ Open. 2021 Feb 11;11(2):e044291. doi: 10.1136/bmjopen-2020-044291 (PMC7880119; doi:10.1136/bmjopen-2020-044291), 2021-02-11
Supplement: bmjopen-2020-044291.draft_revisions.pdf [file bmjopen-2020-044291.draft_revisions.pdf]

# BMJ Open

BMJ Open is committed to open peer review. As part of this commitment we make the peer review history of every article we publish publicly available.

When an article is published we post the peer reviewers' comments and the authors' responses online. We also post the versions of the paper that were used during peer review. These are the versions that the peer review comments apply to.

The versions of the paper that follow are the versions that were submitted during the peer review process. They are not the versions of record or the final published versions. They should not be cited or distributed as the published version of this manuscript.

BMJ Open is an open access journal and the full, final, typeset and author-corrected version of record of the manuscript is available on our site with no access controls, subscription charges or pay-per-view fees (<http://bmjopen.bmj.com>).

If you have any questions on BMJ Open's open peer review process please email [info.bmjopen@bmj.com](mailto:info.bmjopen@bmj.com)

# BMJ Open

## Initiatives for improving delayed discharge from a hospital setting: A scoping review

|                               |                                                                                                                                                                                                                                                                                                                                                                                                                                                                                                 |
|-------------------------------|-------------------------------------------------------------------------------------------------------------------------------------------------------------------------------------------------------------------------------------------------------------------------------------------------------------------------------------------------------------------------------------------------------------------------------------------------------------------------------------------------|
| Journal:                      | <i>BMJ Open</i>                                                                                                                                                                                                                                                                                                                                                                                                                                                                                 |
| Manuscript ID                 | bmjopen-2020-044291                                                                                                                                                                                                                                                                                                                                                                                                                                                                             |
| Article Type:                 | Original research                                                                                                                                                                                                                                                                                                                                                                                                                                                                               |
| Date Submitted by the Author: | 31-Aug-2020                                                                                                                                                                                                                                                                                                                                                                                                                                                                                     |
| Complete List of Authors:     | Cadel, Lauren; Trillium Health Partners, Institute for Better Health; University of Toronto, Leslie Dan Faculty of Pharmacy<br>Guilcher, Sara; University of Toronto, Leslie Dan Faculty of Pharmacy<br>Kokorelias, Kristina; University of Toronto, Rehabilitation Sciences Institute<br>Sutherland, Jason; University of British Columbia<br>Glasby, Jon; University of Birmingham<br>Kiran, Tara; University of Toronto Department of Medicine,<br>Kuluski, Kerry; Trillium Health Partners, |
| Keywords:                     | Health & safety < HEALTH SERVICES ADMINISTRATION & MANAGEMENT, Health policy < HEALTH SERVICES ADMINISTRATION & MANAGEMENT, International health services < HEALTH SERVICES ADMINISTRATION & MANAGEMENT, Protocols & guidelines < HEALTH SERVICES ADMINISTRATION & MANAGEMENT                                                                                                                                                                                                                   |
|                               |                                                                                                                                                                                                                                                                                                                                                                                                                                                                                                 |

SCHOLARONE™  
Manuscripts

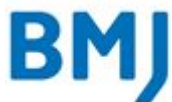

I, the Submitting Author has the right to grant and does grant on behalf of all authors of the Work (as defined in the below author licence), an exclusive licence and/or a non-exclusive licence for contributions from authors who are: i) UK Crown employees; ii) where BMJ has agreed a CC-BY licence shall apply, and/or iii) in accordance with the terms applicable for US Federal Government officers or employees acting as part of their official duties; on a worldwide, perpetual, irrevocable, royalty-free basis to BMJ Publishing Group Ltd ("BMJ") its licensees and where the relevant Journal is co-owned by BMJ to the co-owners of the Journal, to publish the Work in this journal and any other BMJ products and to exploit all rights, as set out in our [licence](#).

The Submitting Author accepts and understands that any supply made under these terms is made by BMJ to the Submitting Author unless you are acting as an employee on behalf of your employer or a postgraduate student of an affiliated institution which is paying any applicable article publishing charge ("APC") for Open Access articles. Where the Submitting Author wishes to make the Work available on an Open Access basis (and intends to pay the relevant APC), the terms of reuse of such Open Access shall be governed by a Creative Commons licence – details of these licences and which [Creative Commons](#) licence will apply to this Work are set out in our licence referred to above.

Other than as permitted in any relevant BMJ Author's Self Archiving Policies, I confirm this Work has not been accepted for publication elsewhere, is not being considered for publication elsewhere and does not duplicate material already published. I confirm all authors consent to publication of this Work and authorise the granting of this licence.

1  
2  
3 1 **Title:** Initiatives for improving delayed discharge from a hospital setting: A scoping review  
4 2  
5 3

6 4 **Authors:**

7 5 Cadel, L<sup>1,2\*</sup>

8 6 Guilcher, SJT<sup>2,3</sup>

9 7 Kokorelias, KM<sup>4</sup>

10 8 Sutherland, JM<sup>5</sup>

11 9 Glasby, J<sup>6</sup>

12 10 Kiran, T<sup>3,7,8,9</sup>

13 11 Kuluski, K<sup>1,3</sup>  
14 12  
15 13

16 14 **Affiliations:**

17 15 <sup>1</sup> Institute for Better Health, Trillium Health Partners, Mississauga, Ontario, Canada

18 16 <sup>2</sup> Leslie Dan Faculty of Pharmacy, University of Toronto, Toronto, Ontario, Canada

19 17 <sup>3</sup> Institute of Health Policy, Management and Evaluation, Dalla Lana School of Public Health,  
20 18 University of Toronto, Toronto, Ontario, Canada

21 19 <sup>4</sup> Rehabilitation Sciences Institute, Faculty of Medicine, University of Toronto, Toronto,  
22 20 Ontario, Canada

23 21 <sup>5</sup> Centre for Health Services and Policy Research, School of Population and Public Health,  
24 22 University of British Columbia, Vancouver, British Columbia, Canada

25 23 <sup>6</sup> School of Social Policy, University of Birmingham, Edgbaston, Birmingham, United  
26 24 Kingdom

27 25 <sup>7</sup> Department of Family and Community Medicine, St. Michael's Hospital, University of  
28 26 Toronto, Toronto, Ontario, Canada

29 27 <sup>8</sup> MAP Centre for Urban Health Solutions, St. Michael's Hospital, Toronto, Ontario, Canada

30 28 <sup>9</sup> Ontario Health (Quality Division), Toronto, Ontario, Canada  
31 29  
32 30

33 31 **\*Corresponding Author:**

34 32 Lauren Cadel

35 33 lauren.cadel@thp.ca  
36  
37  
38  
39  
40  
41  
42  
43  
44  
45  
46  
47  
48  
49  
50  
51  
52  
53  
54  
55  
56  
57  
58  
59  
60

## 34 **Abstract**

35 **Objective:** To examine peer-reviewed and grey literature for best practices that have been  
36 developed and/or evaluated for delayed discharge involving a hospital setting.

37 **Design:** Scoping review

38 **Methods:** Electronic databases and websites of government and healthcare organizations were  
39 searched for eligible articles. Articles were required to include an initiative that focused on  
40 delayed discharge, involve a hospital setting and be published between January 1, 2004 and  
41 August 16, 2019. Data were extracted using Microsoft Excel. Following extraction, a policy  
42 framework by Doern and Phidd was adapted to organize the included initiatives into categories:  
43 (1) Information Sharing; (2) Tools and Guidelines; (3) Practice Change; (4) Infrastructure and  
44 Finance; and (5) Other.

45 **Results:** Sixty-six articles were included in this review. The majority of initiatives were  
46 categorized as practice change (n=36), followed by information sharing (n=19) and tools and  
47 guidelines (n=19). Numerous initiatives incorporated multiple categories. The majority of  
48 initiatives were implemented by multidisciplinary teams and resulted in improved outcomes such  
49 as reduced length of stay and discharge delays. However, outcomes lacked experience measures,  
50 especially among patients and families. Included initiatives also lacked important contextual  
51 information, which is essential for replicating best practices and scaling up.

52 **Conclusions:** This scoping review identified a number of initiatives that have been implemented  
53 to target delayed discharges. While the majority of initiatives resulted in positive outcomes,  
54 delayed discharges remain an international problem. There are significant gaps and limitations in  
55 evidence and thus, future work is warranted to develop solutions that have a sustainable impact.

1  
2  
3 56 **Protocol Registration:** Open Science Framework (<https://osf.io/rfzgu>)  
4  
5

6 57 **Keywords**  
7  
8

- 9 • Delayed discharge, alternate level of care, delayed transfer, best practices, scoping  
10 review, hospital  
11  
12  
13

14  
15 60 **Article summary: Strengths and limitations of this study**  
16  
17

- 18 • To our knowledge, this is the first scoping review to identify best practices for delayed  
19 discharges involving a hospital setting  
20  
21  
22  
23 • The Preferred Reporting Items for Systematic reviews and Meta-Analyses extension for  
24 Scoping Reviews (PRISMA-ScR) Checklist was followed  
25  
26  
27 • A comprehensive search of peer reviewed and grey literature was conducted  
28  
29  
30 • A critical appraisal of the interventions was not performed  
31  
32  
33  
34  
35  
36  
37  
38  
39  
40  
41  
42  
43  
44  
45  
46  
47  
48  
49  
50  
51  
52  
53  
54  
55  
56  
57  
58  
59  
60

## 67 Introduction

68 A delayed hospital discharge (known as alternate level of care (ALC) in Canada and  
69 delayed transfer of care in the United Kingdom) occurs when a patient is medically approved to  
70 be discharged, but remains in hospital for nonmedical reasons (e.g. waiting for a long-term care  
71 bed to become available or to transfer home with services).<sup>1</sup> While waiting for their next  
72 destination, patients' level of care and activation often decrease or stop entirely. Delayed  
73 discharge can result in overall hospital patient flow issues (e.g. emergency service backlogs,  
74 cancelled surgeries, delays in medically necessary care),<sup>2</sup> increased healthcare costs,<sup>3</sup> an  
75 increased risk of functional decline,<sup>4,5</sup> falls,<sup>6</sup> hospital related adverse events (e.g. medication  
76 error, exposure to infectious disease),<sup>6,7</sup> mortality,<sup>8</sup> as well as poor patient and family  
77 experiences.<sup>9</sup>

78 Patients who experience a delayed discharge in previous studies exhibited the following  
79 characteristics: female,<sup>10</sup> older,<sup>10,11</sup> physically or cognitively impaired,<sup>4,12-15</sup> aggressive  
80 behaviours,<sup>16</sup> use assistive devices,<sup>17</sup> psychiatric conditions,<sup>10</sup> neurologic disorders<sup>15</sup> and/or  
81 multimorbidity.<sup>17</sup> In addition to these patient-level factors, there are a number of system-level  
82 factors that contribute to delayed discharges, including long wait lists for long-term care  
83 facilities,<sup>5,17-19</sup> rehabilitation or other post-acute care (e.g. home care),<sup>11,12,20-23</sup> the lack of  
84 culturally and religiously diverse long-term care facilities,<sup>15</sup> limited or absent hospital services  
85 on weekends<sup>24</sup> and organizational delays (e.g. administrative delays, delayed assessments).<sup>24,25</sup>  
86 There are also different pressures and priorities across sectors, with little incentive to work  
87 together as a system. For example, while hospitals may be focused on efficiency and throughput,  
88 community-based organizations may be focusing on empowerment, longer term quality of life  
89 outcomes and working at a pace that works for patients and families. The funding structure of

1  
2  
3 90 hospitals and healthcare systems can also have an impact on overall patient flow, including  
4  
5 91 discharge delays. Although there is wide variation in funding structures within and across  
6  
7 92 countries, there is potential for funding to either incentivize or dis-incentivize timely hospital  
8  
9 93 discharges.<sup>26-30</sup>

10  
11  
12  
13 94 The combination of patient and system-level factors contributing to delayed discharges  
14  
15 95 can also have a large financial impact on patients, families, healthcare providers and the  
16  
17 96 healthcare system.<sup>3</sup> A recent systematic review reported that delayed discharges cost  
18  
19 97 approximately £200-565 (320-900 CAD) per patient, per day.<sup>3</sup> Further, it was estimated that the  
20  
21 98 National Health Service (England) spends £820 million (1.3 billion CAD) every year on patients  
22  
23 99 who have a discharge delay.<sup>31</sup> Similarly, a recent report from Canada stated that three hospitals  
24  
25  
26 100 located in Ottawa, Ontario, spend approximately 250,000 CAD per day (combined) on patients  
27  
28 101 occupying beds at a level of care they no longer require.<sup>32</sup> In addition to large costs for hospitals  
29  
30 102 and healthcare systems, delayed hospital discharges can also result in out-of-pocket costs for  
31  
32 103 patients and families.<sup>33</sup> Increased out-of-pocket costs, in addition to the others uncertainties  
33  
34 104 associated with a delay, can heighten stress for patients and families, contribute to poor  
35  
36 105 experiences and compromise quality of life.<sup>9</sup>

37  
38  
39  
40  
41 106 Overall, delayed hospital discharges are problematic internationally, highlighting a need  
42  
43 107 to identify best practices and current initiatives that are concentrating on solutions to this  
44  
45 108 complex problem. To date, the majority of published literature on delayed discharge has focused  
46  
47 109 on risk factors and characteristics of patients who experience delayed discharge. There has been  
48  
49 110 a limited focus on initiatives that address the complex problem of delayed discharge. Therefore,  
50  
51 111 the purpose of this scoping review was to examine peer-reviewed and grey literature for  
52  
53 112 initiatives that have been developed and/or evaluated for delayed discharge from a hospital  
54  
55  
56  
57  
58  
59  
60



1  
2  
3 113 setting, with the goal of identifying best practices for reducing delayed discharge. Furthermore, a  
4  
5 114 scoping review methodology was appropriate for addressing this goal, in order to identify the  
6  
7  
8 115 types of available evidence on this topic, examine key characteristics relating to initiatives for  
9  
10 116 delayed discharge and to identify knowledge gaps.<sup>34</sup>  
11  
12

## 13 117 **Methods**

14  
15

16 118 This review followed the scoping review methodology outlined by Levac and  
17  
18 119 colleagues,<sup>35</sup> as well as the recently developed PRISMA-ScR reporting guidelines for scoping  
19  
20 120 reviews (see Supplementary Table 1).<sup>36</sup> A protocol for this scoping review was developed in  
21  
22 121 consultation with a librarian at the University of Toronto, with continuous input from all  
23  
24 122 members of the research team. The registered protocol can be found on Open Science  
25  
26 123 Framework (<https://osf.io/rfzgu>).  
27  
28  
29  
30

### 31 124 **Stage 1: Identifying the research question**

32  
33

34 125 The research question developed to lead this scoping review was: *what is known in the*  
35  
36 126 *literature about initiatives (e.g. strategies, programs, interventions) that have been developed,*  
37  
38 127 *implemented, and/or evaluated for delayed discharge involving a hospital setting?* The two main  
39  
40 128 objectives were: (1) to review what delayed discharge initiatives entail (e.g. characteristics,  
41  
42 129 outcomes) and (2) to identify gaps in the literature in order to inform future studies.  
43  
44  
45

### 46 130 **Stage 2: Identifying relevant articles**

47  
48

49 131 The search strategy was developed with a librarian at the University of Toronto and  
50  
51 132 through consultations with an advisory group and collaborators who have experience in clinical  
52  
53 133 practice or administration (see Supplementary Table 2 for Medline search strategy). Each search  
54  
55 134 strategy was adapted for the specific database using appropriate command line syntax and  
56  
57  
58  
59  
60

1  
2  
3 135 indexing. The following are examples of keywords searched using Boolean operators, proximity  
4  
5 136 operators, wild cards and truncations: *alternate level of care, delayed discharge, delayed*  
6  
7 137 *transfer, bed blocking, strategy, model, intervention, program, policy.*  
8  
9

10 138 Electronic databases were searched for relevant articles. The following electronic  
11  
12 139 databases were searched on August 16, 2019: MEDLINE (Ovid Interface), EMBASE (Ovid  
13  
14 140 Interface), AMED (Ovid Interface), Cumulative Index to Nursing and Allied Health Literature  
15  
16 141 (EBSCO Interface) and Cochrane Library. Grey literature was searched on numerous national  
17  
18 142 and international healthcare and government websites. We also reached out to key stakeholders,  
19  
20 143 including members of our advisory group, to send us relevant reports and presentations.  
21  
22  
23  
24

### 25 144 **Stage 3: Study selection**

26  
27  
28 145 For inclusion, articles were required to meet the following criteria: (1) focused on  
29  
30 146 delayed discharge, (2) included an initiative to address delayed discharge, (3) involved a hospital  
31  
32 147 setting, (4) published between January 1, 2004 and August 16, 2019, and (5) peer-reviewed or  
33  
34 148 grey literature. We focused our inclusion on initiatives involving a hospital setting because this is  
35  
36 149 where the problem of delayed discharges surfaces. Articles were excluded if they met any one of  
37  
38 150 the following criteria: (1) focused on changing the threshold/timing of discharge (early  
39  
40 151 discharge), (2) books, book chapters, opinion pieces or editorials, (3) grey literature that did not  
41  
42 152 sufficiently describe the initiative implemented (e.g. implementation process, location,  
43  
44 153 population, impact); (4) protocols, trial papers or chart reviews, or (5) conference abstracts or  
45  
46 154 articles without an accessible full-text. Articles were excluded for criteria one (changing the  
47  
48 155 threshold/timing of discharge) because the rationale for having an earlier discharge was often  
49  
50 156 focused on other factors such as cost-savings by reducing length of stay, rather than specifically  
51  
52 157 addressing a delayed discharge. Articles were excluded if they met criteria two (books, book  
53  
54  
55  
56  
57  
58  
59  
60

1  
2  
3 158 chapters, opinion pieces or editorial) to eliminate articles with potential personal biases and  
4  
5 159 summaries of peer-reviewed literature. Grey literature that did not provide sufficient details on  
6  
7  
8 160 the initiative (such as lacking a description of the components of the initiative) were excluded.  
9  
10 161 Articles published more than 15 years ago, before January 1, 2004, were excluded to ensure the  
11  
12 162 initiatives included in this scoping review were relevant to more current health service practices.  
13  
14

15 163 Articles identified from the database searches were imported into EndNote X9, a  
16  
17 164 reference management software, where they were de-duplicated following Bramer's method.<sup>37</sup>  
18  
19 165 The initial database searches identified 22,704 articles, which were reduced to 15,824 following  
20  
21 166 de-duplication (Figure 1). The titles and abstracts of the articles were reviewed on Covidence, a  
22  
23 167 software platform for systematic and scoping reviews.<sup>38</sup> The research team (LC, JL, KK, SJTG,  
24  
25 168 KMK, JK) independently screened the titles and abstracts of 40 articles to test their agreement.  
26  
27 169 The reviewers had a good percent agreement (85%), so the remaining articles were divided  
28  
29 170 amongst the team and screened by single reviewers (LC, KMK, JK). All disagreements were  
30  
31 171 discussed in-person by the reviewers until a consensus was reached; minor revisions were made  
32  
33 172 to the eligibility criteria to ensure clarity and consistency. Following title and abstract screening,  
34  
35 173 articles were reviewed at the full-text level. Thirty full-text articles were independently screened  
36  
37 174 by the research team (LC, KK, SJTG, KMK, JK, MA) to test their interrater agreement. The  
38  
39 175 remaining full-text articles (peer reviewed and grey literature) were double screened by four  
40  
41 176 reviewers (LC, KMK, JK, MA).  
42  
43  
44  
45  
46  
47

48 177 **Figure 1. PRISMA flow diagram of included articles [insert near here]**  
49  
50  
51  
52  
53  
54  
55  
56  
57  
58  
59  
60

## 178 **Stage 4: Charting the data**

179           The data were charted by two reviewers (LC, KMK) using a data extraction form in  
180 Microsoft Excel. The form was developed and tested by the research team in a series of team  
181 meetings prior to the extraction of all data. We conducted spot checking of extracted data from  
182 15 percent of the included articles to ensure completeness and accuracy of the extracted data.  
183 Any questions that arose during the charting process were discussed by the team. Charted data  
184 contained the following information: general information, study characteristics, population  
185 characteristics, initiative characteristics, characteristics of delayed discharge, study outcomes and  
186 conclusions.

## 187 **Stage 5: Collating, summarizing and reporting results**

188           Microsoft Excel was used to conduct a descriptive quantitative analysis of the included  
189 articles, as well as facilitate qualitative thematic analysis. The thematic analysis of the charted  
190 data was an inductive and iterative process, in which the team (LC, SJTG, KMK, KK) met in-  
191 person to discuss high level concepts and identified common themes across the included articles.  
192 When reviewing the extracted data from the articles, we found that the strategies appeared to  
193 cluster into core categories, which aligned with a conceptual framework developed by Doern and  
194 Phidd.<sup>39</sup> This framework classifies policy instruments/tools along a continuum (from those that  
195 are least coercive like information sharing to those that are more coercive like public ownership  
196 or, in our case, new infrastructure). We deductively applied Doern and Phidd's categories to  
197 classify our findings, with some minor adaptations. The five adapted categories were not  
198 mutually exclusive and included: (1) information sharing (recommended initiatives and live  
199 information sharing); (2) tools and guidelines; (3) practice change; (4) infrastructure and finances

200 and (5) other (see Table 1 for category descriptions and examples). The categories assisted with  
201 the organization and presentation of the data.

## 202 **Stage 6: Consultation**

203 The research team presented findings of the scoping review to key stakeholders (e.g.  
204 hospital staff, patient and caregiver partners) through the planning process and analysis of  
205 results. These meetings were used to inform search terms and obtain relevant documents as  
206 previously described, obtain their feedback on the categorization/ organization of initiatives, as  
207 well as the identified knowledge gaps in order to develop targeted and actionable  
208 recommendations for future practice, policy and research.

## 209 **Patient and public involvement**

210 An Advisory Council (patient and caregiver partners), along with providers, managers  
211 and organizational leaders identified the lack of understanding about the state of evidence around  
212 best practices for delayed discharges, which informed the research question for this scoping  
213 review. The Advisory Council was involved with planning meetings, in which they provided  
214 feedback on the search terms and analysis. Results will be disseminated to the Advisory Council  
215 through presentations and a lay summary.

## 216 **Results**

### 217 **Study characteristics**

218 The database search identified 15,824 unique articles that were screened for eligibility;  
219 following title/ abstract and full-text review, 66 articles were included in this scoping review, 49

1  
2  
3 220 articles from the database searches and 17 articles from the grey literature searches (Figure 1).  
4  
5 221 The majority of included articles were quantitative studies (n=34), with a few qualitative (n=5),  
6  
7 222 mixed methods (n=6) or other designs (policy analyses, reviews, case studies and presentations;  
8  
9 223 n=21). Most initiatives were evaluated (n=42), with different types of evaluations such as  
10  
11 224 process evaluations and outcome evaluations. The United Kingdom (n=21), United States (n=18)  
12  
13 225 and Canada (n=17) were the most common countries where studies were conducted. Based on  
14  
15 226 the year of publication, there was a fairly even distribution of peer-reviewed articles across the  
16  
17 227 years of inclusion (from 2004 to 2019); however, the majority of grey literature was published in  
18  
19 228 the last 10 years. Table 2 describes the characteristics of included articles.  
20  
21  
22  
23

24 229 The initiatives most commonly targeted adults and older adults; however, there were  
25  
26 230 some initiatives targeting the pediatric population. Specific characteristics of the study  
27  
28 231 population (i.e. age, sex, gender, ethnicity/race, income level, education, marital status,  
29  
30 232 household composition, employment status, comorbidities) were not reported in the majority of  
31  
32 233 articles. Most peer-reviewed articles (n=31) defined a delayed discharge; however, there was a  
33  
34 234 wide variety of definitions for these terms (see Supplementary Table 3). The most common  
35  
36 235 definition for delayed discharge was when a patient was identified as medically ready for  
37  
38 236 discharge, but remained in hospital. Table 3 describes the initiative characteristics.  
39  
40  
41  
42  
43

44 237 Based on Doern and Phidd's adapted framework,<sup>39</sup> we categorized the included initiatives  
45  
46 238 as: information sharing (n=19); tools and guidelines (n=19); practice change (n=36);  
47  
48 239 infrastructure and finances (n=10); or other (n=3), which are described in detail below.  
49  
50 240 Numerous articles used a combination of categories in their initiatives (e.g. information sharing  
51  
52 241 and practice change).  
53  
54  
55  
56  
57  
58  
59  
60

## 242 **Information sharing**

243           The information sharing category included initiatives that promoted communication,  
244 leadership from senior staff and information exchange within or across organizations.<sup>2 40-55</sup> The  
245 majority of information sharing initiatives included team meetings and huddles to facilitate  
246 communication through in-person interactions (between staff or staff and patients/families).<sup>40 41</sup>  
247 <sup>43 44 46</sup> Information sharing was promoted between multidisciplinary teams and patients to  
248 improve length of stay and continuity of care. For example, Adlington and colleagues (2018)  
249 implemented Plan Do Study Act cycles during weekly quality improvement meetings, in which  
250 driver diagrams (visual displays) were used to share information with the multidisciplinary  
251 project team on issues affecting length of stay and hospital bed occupancy.<sup>40</sup> This information  
252 was used to guide practice changes aimed at improving communication during the discharge  
253 process (daily rounds, focusing on long-stay patients), bed management (nursing support to  
254 prevent deterioration) and community services (email updates and involvement of care  
255 coordinators). The majority of initiatives shared information though in-person communication;  
256 however, some used technology. Caminiti and colleagues (2013) used technology-assisted  
257 communication to develop reports and audits to motivate and hold physicians accountable,<sup>42</sup> as  
258 in some health systems, physicians play a key role in designating patients as having a delayed  
259 discharge. Profiles for each physician were created monthly using hospital administrative data  
260 (containing length of stay, number of patient discharged that month). All information sharing  
261 initiatives resulted in positive outcomes (e.g. reduced length of stay and a decrease in delayed  
262 discharges).

## 263 **Tools and guidelines**

264           The tools and guidelines category included initiatives with actionable, concrete steps or  
265 processes in the form of tools, guidelines and models to inform practice.<sup>47-50 54-67</sup> Physicians and  
266 multidisciplinary teams (e.g. nurses, social workers, discharge planners) frequently implemented  
267 tool and guideline initiatives. A promising initiative within this category included the ALC  
268 Avoidance Framework, developed by Burr and colleagues (2017), with the goal of preventing  
269 ALC designations and reducing ALC rates.<sup>56 67</sup> This framework contains 12 leading practices,  
270 with specific strategies for organizational assessment. Some of the leading practices include:  
271 providing patients and substitute decision makers with an estimated date of discharge,  
272 identifying high-risk patients of becoming ALC and implementing escalation processes for the  
273 management of ALC challenges. Additional initiatives focused on improving patient flow  
274 through criteria-led discharges (discharging patients once a pre-determined set of criteria had  
275 been met) and critical pathways/ discharge guidelines.

276           The majority of initiatives categorized as tools and guidelines had positive results,<sup>47-49 54-</sup>  
277 <sup>60 62 64-66</sup> which included a reduction in hospital days and length of stay. However, one initiative,  
278 the Goal Length of Stay Tool, did not have positive outcomes on length of stay.<sup>50</sup> This initiative  
279 incorporated information sharing into a computer-based program to identify patients whose  
280 length of stay exceeded their benchmark figure. It had no change on length of stay and was  
281 perceived negatively by staff because they did not believe the benchmark figure was an accurate  
282 representation of a patient's current functional status and readiness for discharge.



## 283 **Practice changes**

284 This category included initiatives that altered how usual care was delivered.<sup>51-55 63-66 68-92</sup>  
285 Common practice change initiatives included hospital-based nurse-led discharges and cross-  
286 sectoral transitional programs (e.g. Home First, Discharge to Assess, Hospital to Home), with  
287 most implemented by nurses and multidisciplinary teams. Nurse and criteria-led discharges often  
288 involved a pre-determined list of criteria (clinical parameters) that a patient was required to meet  
289 in order to be discharged from hospital by a member of the discharge team. For example,  
290 Graham and colleagues (2012) conducted a retrospective study (N=128) to compare nurse-led  
291 and doctor-led discharge (standard discharge pathway) post laparoscopic surgery.<sup>74</sup> For nurse-led  
292 discharge, the patient had to meet 13 pre-established criteria (stable vital signs and comparable to  
293 baseline on admission; achieved optimal mobility; minimal nausea, vomiting and dizziness;  
294 adequate pain control; received written and verbal instructions about post-operative care, etc.).  
295 When compared to the doctor-led discharge group (n=64), patients in the nurse-led group (n=64)  
296 were significantly more likely to be discharged on the day of surgery and had a significantly  
297 smaller number of patients with no medical or social reason for delayed discharge.

298 Another unique example of a practice change initiative was the 7-Day Hospital Initiative  
299 implemented by Blecker and colleagues.<sup>70</sup> The purpose of this observational study was to  
300 evaluate the impact of increasing weekend staff (hospitalists, care managers, social workers) and  
301 services on length of stay, percent of patients discharged on weekends, 30-day readmission rate  
302 and in-hospital mortality rate. This multifaceted intervention resulted in a decreased average  
303 length of stay, an increased proportion of weekend discharges and no impact on readmission  
304 rates or mortality.

1  
2  
3 305 The majority of initiatives categorized as a practice change resulted in positive outcomes  
4  
5 306 on length of stay and rate of discharge delays. However, there were several initiatives that were  
6  
7 307 perceived negatively by patients,<sup>77</sup> or had no change<sup>68 75</sup> or a negative impact<sup>52</sup> on study  
8  
9 308 outcomes (increase in delayed discharges). Meehan and colleagues (2018) explored patient  
10  
11 309 experiences with a program (Discharge to Assess) that discharged patients who were clinically  
12  
13 310 ready but still required support, in order for their needs to be assessed in their own environment  
14  
15 311 (i.e. at home).<sup>77</sup> Negative experiences were described by participants (patients and caregivers)  
16  
17 312 who indicated feeling ignored, had poor communication with their healthcare providers and were  
18  
19 313 not involved in the decision-making process. Negative outcomes were also identified in Williams  
20  
21 314 and colleagues (2010) prospective cohort study.<sup>52</sup> This study evaluated the impact of a critical  
22  
23 315 care outreach role on delays in discharge and identified that discharge delays from the intensive  
24  
25 316 care unit increased over the study period with the implementation of this role. The authors  
26  
27 317 emphasized the importance of a multifaceted and collaborative approach (involving multiple  
28  
29 318 stakeholders/ team members), focusing on patient flow throughout the hospital in order to  
30  
31 319 address the numerous factors impacting delays.  
32  
33  
34  
35  
36  
37  
38

## 39 **Infrastructure and finances**

40  
41 321 The infrastructure and finance category included initiatives that involved tangible  
42  
43 322 structural or financial changes (e.g. building more long-term care beds to facilitate the transition  
44  
45 323 of patients out of hospital, financial penalties for remaining in hospital after being medically  
46  
47 324 ready for discharge).<sup>55 92-100</sup> The Community Care (Delayed Discharges) Act in the United  
48  
49 325 Kingdom was an initiative identified in multiple articles.<sup>93 96 97 100</sup> This initiative required local  
50  
51 326 authorities to make payments to acute hospitals when patients could not be discharged because  
52  
53 327 appropriate community care arrangements had not been made. Although this measure was not  
54  
55  
56  
57  
58  
59

1  
2  
3 328 necessarily enforced, it created incentive for the hospital and community to work together more  
4  
5 329 collaboratively. Additionally, transitional care units<sup>94 95</sup> and discharge funds<sup>98 99</sup> were common  
6  
7 330 initiatives implemented to address delayed discharges among elderly patients. Transitional care  
8  
9  
10 331 units focused on rehabilitation to promote recovery and the regaining of independence, while  
11  
12 332 discharge funds paid for services that were preventing the patient from being discharged or  
13  
14 333 returning home (e.g. medical equipment, medications, transportation, home repairs). All  
15  
16 334 initiatives categorized as infrastructure and finances had positive results on study outcomes,  
17  
18 335 including reductions in discharge delays, length of stay and cost.<sup>93-98</sup>  
19  
20  
21

## 22 336 **Other initiatives**

23  
24  
25 337 The other initiatives category included statistical and predictive modeling of initiatives to  
26  
27 338 improve delayed discharges.<sup>101-103</sup> These models explored the impact of increasing the supply of  
28  
29 339 nursing home beds,<sup>101</sup> potential care pathways for the elderly and reimbursement costs<sup>102</sup> and  
30  
31 340 discharge strategies to reduce hospital occupancy.<sup>103</sup> Gaughan and colleagues' (2012) modelling  
32  
33 341 and empirical analysis identified that increasing the supply of long-term care beds can decrease  
34  
35 342 delayed discharges caused by a lack of social care.<sup>101</sup> Their models further emphasized the  
36  
37 343 importance of communication between hospitals and the long-term care sector to reduce social  
38  
39 344 care delayed discharges. Similarly, Katasaliaki et al. (2005) used discrete-event simulations to  
40  
41 345 determine care pathways and associated costs, in which they identified that adding new beds in  
42  
43 346 hospital or Intermediate Care could reduce delay times.<sup>102</sup>  
44  
45  
46  
47  
48

## 49 347 **Recommended initiatives – Calls to action**

50  
51  
52 348 Several articles were not evaluations but reports or reviews consisting of recommended  
53  
54 349 initiatives to address delayed hospital discharges, which often combined a number of the  
55  
56  
57  
58  
59  
60

1  
2  
3 350 categories illustrated above.<sup>2 45 92 104</sup> Sutherland and Crump (2013) outlined three key solutions  
4  
5 351 for improving delayed discharges in Canada: building more acute and post-acute care beds,  
6  
7 352 increasing integrated care and creating financial incentives to improve the quality, quantity and  
8  
9 353 effectiveness of healthcare.<sup>45</sup> The authors discussed challenges and limitations to implementing  
10  
11 354 each of these options and emphasized that a potential solution to addressing delayed discharges  
12  
13 355 was to combine the three strategies. Another Canadian report developed recommendations for  
14  
15 356 providing care to the aging population and those experiencing a delayed discharge.<sup>2</sup> Walker  
16  
17 357 (2011) outlined recommendations for improving primary care, the care continuum and senior  
18  
19 358 friendly acute care, responding to special needs populations (e.g. persons with mental health  
20  
21 359 concerns, addiction and neurological conditions, on dialysis or ventilators), and implementing an  
22  
23 360 “Assess and Restore” model (a program to help patients maintain or regain functional  
24  
25 361 independence, transition to home, and remain in the community for as long as possible).

26  
27  
28  
29  
30  
31 362 The NHS Improvement (United Kingdom) also released a guide in 2019 on reducing long  
32  
33 363 hospital stays.<sup>104</sup> This guide contained several recommendations for tackling delayed discharges  
34  
35 364 including: a patient flow bundle (a tool to reduce delays for patients on inpatient wards),  
36  
37 365 Red2Green Days (a visual tool to reduce unnecessary waiting by patients by supporting the  
38  
39 366 rounding process), long-stay patient reviews (weekly reviews of long-stay patients (>20 days), to  
40  
41 367 help tackle obstacles that are delaying discharge) and multiagency discharge events (review of  
42  
43 368 individual patient journeys by bringing together senior staff from the local health and social care  
44  
45 369 system).

## 370 Discussion

371 The purpose of this scoping review was to identify best practices for reducing delayed  
372 discharges, examine the characteristics of identified initiatives and develop recommendations for  
373 future work. Based on the 66 included articles, our findings show that: (1) initiatives are focused  
374 on quantitative outcomes, with limited assessment of the impact on patient, caregiver and  
375 provider experiences; (2) the sustainability of initiatives overtime is not measured and (3) there is  
376 a lack of important contextual information reported (e.g. population characteristics, setting,  
377 implementation processes); and (4) there are inconsistencies in how delayed discharges are  
378 defined.

379 This review highlighted where the majority of efforts around addressing delayed  
380 discharges have been placed. Practice change was the most common categorization of initiatives  
381 (n=36), followed by information sharing (n=19) and infrastructure and finance (n=19). All  
382 initiatives categorized as information sharing and infrastructure and finance reported positive  
383 outcomes. Despite reporting positive outcomes, many information sharing initiatives promoted  
384 communication between staff, with a limited number targeting communication with patients and  
385 families. Additionally, there were more initiatives implemented in a single sector (e.g. in  
386 hospital) in comparison to cross-sectoral initiatives (e.g. hospital and home care).

387 Length of stay was the most common outcome measured in this scoping review, with a  
388 limited number of articles exploring patient, caregiver and provider experiences. For example,  
389 could it be considered a success if an initiative does not result in a reduced length of stay, but  
390 allows patients to obtain broader goals related to their care (i.e. being able to return home) or  
391 enhance their care experience? Qualitative methods, including the capturing of patient, caregiver  
392 and provider experiences, would allow for a deeper exploration and understanding of success

1  
2  
3 393 from the perspectives of different stakeholders involved in the initiative.<sup>105-107</sup> Experiential  
4  
5 394 evidence on whether an intervention is working is required. As noted in our review, a tool  
6  
7 395 developed to better understand delayed discharge was deemed irrelevant by care providers who  
8  
9 396 felt that the tool captured the wrong information.<sup>50</sup> Therefore, capturing providers' experiences  
10  
11 397 and perspectives are essential in understanding effectiveness of strategies as well as uptake. Most  
12  
13 398 articles included in this scoping review used a quantitative study design, with limited articles  
14  
15 399 using a mixed methods or qualitative approach; thus highlighting a key focus for future research.  
16  
17  
18  
19

20 400 The majority of initiatives had an intervention or follow-up period of one year, but this  
21  
22 401 ranged from four months to three years. Based on the limited number initiatives with a follow-up  
23  
24 402 period of longer than one year (n=8), there is a need for more formal evaluations with longer  
25  
26 403 follow-up periods to measure the sustainability of initiatives over time. For example, Shelton and  
27  
28 404 colleagues' Integrated Sustainability Framework consists of five categories of factors associated  
29  
30 405 with the sustainability of interventions across different contexts and settings: outer context (e.g.  
31  
32 406 policies, leadership, funding), inner context (e.g. culture, mission, funding), intervention  
33  
34 407 characteristics (e.g. cost, adaptability, benefit), processes (e.g. partnership, training/support,  
35  
36 408 planning, capacity building) and implementer and population characteristics (e.g. implementation  
37  
38 409 skills/expertise, attitudes/motivation).<sup>108</sup> Shelton et al. recommended prospective, multi-level and  
39  
40 410 mixed methods study designs for studying the impact and sustainability of interventions. Overall,  
41  
42 411 the initiatives included in this scoping review had positive short-term impacts, but it is unclear if  
43  
44 412 these outcomes are maintained over time. This emphasizes the need to design and implement  
45  
46 413 interventions with sustainability in mind.  
47  
48  
49  
50  
51

52 414 The majority of categories of initiatives resulted in positive outcomes; however,  
53  
54 415 initiatives classified as practice change had the most mixed outcomes (positive, negative and no  
55  
56  
57  
58  
59  
60

1  
2  
3 416 change). Practice changes often require a greater number of resources and are more complex to  
4  
5 417 implement than static solutions (i.e. hosting daily rounds, developing a framework, etc.). A  
6  
7 418 recent systematic review (2018) conducted by Geerligs and colleagues identified implementation  
8  
9 419 barriers and facilitators of patient-focused, in-hospital interventions,<sup>109</sup> highlighting the complex  
10  
11 420 interplay of factors that can impact implementation. Three domains, with the potential to impact  
12  
13 421 the implementation process, were identified: system (environmental context, culture,  
14  
15 422 communication processes and external requirements), staff (commitment and attitudes,  
16  
17 423 understanding and awareness, role identity and skills, ability and confidence) and intervention  
18  
19 424 (ease of integration, face validity, safety and legality and supportive components). Thus, it is  
20  
21 425 important for interventions to be nimble and adaptable to support the changing need of patients,  
22  
23 426 caregivers, providers, organizations and policy contexts over time.

24  
25  
26  
27  
28  
29 427 It was also unclear if some initiatives moved problems from one sector to another. For  
30  
31 428 example, adding more intermediate care beds may alleviate pressures in acute care in the short-  
32  
33 429 term but eventually also be at full capacity if community resources are not available. The 7-day  
34  
35 430 hospital discharge initiative highlighted in this review, improved hospital throughput but had no  
36  
37 431 impact on re-admissions,<sup>70</sup> suggesting that thinking beyond one sector is required. It is  
38  
39 432 encouraging that most practice change initiatives resulted in improved outcomes, but more  
40  
41 433 clarity is needed to understand what the trade-offs were, as well as how to scale-up the  
42  
43 434 successful initiatives.

44  
45  
46  
47  
48 435 Health systems also need to consider their broader goals around delayed hospital  
49  
50 436 discharge - should it only be about reducing delays or should we place an equal focus on  
51  
52 437 optimizing patient and caregiver experiences and outcomes? The health system context,  
53  
54 438 including the funding environment, will ultimately shape what interventions get implemented

1  
2  
3 439 and how they are sustained over time. Some interventions may be considered low value in some  
4  
5 440 countries and contexts and high value in others. Additionally, certain initiatives may be more  
6  
7 441 effective in different environments, as variations in the number of hospital and long-term care  
8  
9 442 beds per capita, infrastructure financing and degree of integration across sectors may impact the  
10  
11 443 outcomes of an initiative. Future research needs to better understand why some strategies may  
12  
13 444 thrive in some environments and not others.  
14  
15

16  
17 445 Another key finding identified in the scoping review was the lack of information and  
18  
19 446 details on the implementation strategy (how strategies were implemented, over what time period,  
20  
21 447 how implementation challenges were dealt with), setting (where was it implemented) and  
22  
23 448 population characteristics (who was it implemented for). The implementation of initiatives can  
24  
25 449 be impacted by differences in healthcare system structure and funding. Further, this contextual  
26  
27 450 information is essential for both understanding outcomes, scaling-up and sustainability of  
28  
29 451 interventions because it is not only important to know if the intervention was effective, but also  
30  
31 452 for whom and in what context it was effective.<sup>110 111</sup>  
32  
33  
34  
35

36 453 Finally, this review highlighted a lack of consistency in how delayed discharge is  
37  
38 454 defined, both within and across countries. While there was one definition that was used more  
39  
40 455 frequently (a patient was identified as medically ready/fit for discharge, but remained in  
41  
42 456 hospital), there can be different interpretations of when a patient is considered “medically fit”  
43  
44 457 and who makes this decision. Inconsistent definitions can lead to variations in the reported rates  
45  
46 458 of delayed discharge, which can further impact the perceived applicability and effectiveness of  
47  
48 459 an intervention. Our finding was echoed in a narrative review conducted by Glasby and  
49  
50 460 colleagues (2004), who further explained the challenges differing definitions create when  
51  
52  
53  
54  
55  
56  
57  
58  
59  
60



1  
2  
3 461 attempting to compare findings.<sup>112</sup> In order to mitigate these challenges, it is critical to be more  
4  
5 462 consistent around how delayed discharges are defined.  
6  
7

## 8 463 **Future work**

10  
11 464 From this review, we have identified areas for future research. First, patient, family and  
12  
13 465 provider needs and experiences should be explored during the development and implementation  
14  
15 466 of initiatives aimed at improving delayed discharges. Patients and family engagement is both  
16  
17 467 important and recommended by healthcare and government organizations; however, they are  
18  
19 468 often excluded in the development and write-up of best practice guidelines.<sup>113</sup> Second, evaluation  
20  
21 469 studies that track outcomes over a longer period of time should be conducted to study the  
22  
23 470 sustainability of initiatives over time, how they are adapted (developmental evaluations), as well  
24  
25 471 as their impact on other sectors (e.g. primary and community care). Third, initiatives should be  
26  
27 472 implemented and integrated across sectors (hospital, primary care and home and community  
28  
29 473 care) to help get at the root of the problem and ensure the implementation of an initiative in one  
30  
31 474 setting does not simply shift the problem to another. Fourth, a review should be conducted to  
32  
33 475 assess the state of knowledge around initiatives that are more upstream in nature (e.g. hospital  
34  
35 476 admission avoidance, emergency department diversion and delivery models that proactively  
36  
37 477 address the health and social care needs of individuals in community settings). Finally, there is  
38  
39 478 an opportunity for future research to consider a realist review of the literature on delayed hospital  
40  
41 479 discharge to understand the context, mechanisms of impact, outcomes and theories of change,  
42  
43 480 given that addressing a delayed discharge is a complex problem. As a first step we sought to  
44  
45 481 include interventions that included hospitals, and this revealed a single sector and reactive  
46  
47 482 approach to addressing delayed discharge.  
48  
49  
50  
51  
52  
53  
54  
55  
56  
57  
58  
59  
60

## 483 **Limitations**

484           There are a few limitations of this review that should be noted. It is possible that some  
485 relevant articles were missed because the search was limited from January 1, 2004 and August  
486 16, 2019 and conducted in English. Our search strategy was comprehensive and we conducted an  
487 in-depth search of grey literature to minimize the potential of missed articles. While we did not  
488 limit the inclusion of articles to the English language, our search strategy was in English, so there  
489 is a possibility that articles published in different languages were not identified. Although it is  
490 not a requirement for scoping reviews,<sup>36</sup> the interventions in this review were not critically  
491 appraised and thus, we cannot make recommendations on which interventions should be scaled  
492 up. Health systems are complex, evolving environments, where various iterations of strategies  
493 are regularly implemented, but not necessarily formally reported or published. Future work by  
494 our team will include a process evaluation on how strategies are actually implemented in  
495 different health system contexts, as well as why they work or do not work.

## 496 **Conclusions**

497           This scoping review identified a variety of initiatives addressing delayed discharges  
498 across five categories: information sharing, tools and guidelines, practice change, infrastructure  
499 and finance and other. The majority of initiatives were focused on practice changes and many  
500 incorporated more than one category. Initiatives were often implemented in a single sector,  
501 rather than across sectors. It appears that many strategies implemented in hospitals including  
502 communication huddles, nurse-led discharges, home first programs and building more  
503 infrastructure had positive short-term impacts. Many initiatives that led to positive outcomes  
504 were implemented by a multidisciplinary team and included a number of components (e.g.

1  
2  
3 505 monthly reports and education). The success of these initiatives is based on a service-led  
4  
5 506 definition of success (effective use of hospital resources), rather than success from the patient  
6  
7 507 and family perspective. This highlights the need to shift to a more patient-centred approach that  
8  
9  
10 508 focuses on improving outcomes and experiences, rather than system and hospital outcomes (i.e.  
11  
12 509 length of stay and hospital occupancy) alone. Despite the number of unique initiatives aimed at  
13  
14 510 addressing delayed discharges, current strategies may not be getting at the root of the problem  
15  
16 511 (initiatives/ intervention prior to hospital admission) and there is a need for solutions to this  
17  
18  
19 512 problem that have a long-term and sustainable impact.  
20  
21

## 22 **Acknowledgments**

23  
24  
25 514 The authors would like to thank the University of Toronto librarian for their contribution  
26  
27 515 to the search strategy, as well as Juliane Koropeski (JK) and Maliha Asif (MA) for the help  
28  
29 516 screening articles. We would like to thank the involvement of our stakeholders who provided  
30  
31 517 feedback on our search terms and sent us grey literature. Lastly, we would like to thank our  
32  
33 518 Alternate Level of Care Advisory Council and Ida McLaughlin (chair of council) for their  
34  
35  
36 519 continual support and feedback on this program of work.  
37  
38  
39

## 40 **Funding**

41  
42  
43 521 This work was supported by the Canadian Institutes of Health Research- Transitions in  
44  
45 522 Care Strategic Funding Initiative on Best and Wise Practices (Grant #163064). Dr. Kerry  
46  
47 523 Kuluski holds the Dr. Mathias Gysler Research Chair in Patient and Family Centred Care. Dr.  
48  
49 524 Sara Guilcher is funded by the Canadian Institutes of Health Research Embedded Scientist  
50  
51 525 Salary Award on Transitions in Care working with Ontario Health (Quality); the award also  
52  
53  
54 526 supported staff to assist with screening.  
55  
56  
57  
58  
59  
60

## 527 **Competing interests**

528 The authors have no conflicts of interests to declare.

## 529 **Author contributions**

530 KK, SJTG, JMS, JG and TK were responsible for the conception and design of the study,  
531 as well as acquisition of funding for the study. LC, SJTG, KMK and KK led the screening of  
532 articles and the analysis and interpretation of data, but all authors contributed to the analysis and  
533 interpretation. Drafts of the manuscript were reviewed and revised by all authors. All of the  
534 authors read and approved the final manuscript.

535 **Word count: 5,390**

## 536 References

- 537 1. Bate A. Delayed transfers of care in the NHS, 2017:1-20.
- 538 2. Walker D. Caring For Our Aging Population and Addressing Alternate Level of Care: Report  
539 Submitted to the Minister of Health and Long-Term Care. Canada, 2011.
- 540 3. Rojas-García A, Turner S, Pizzo E, et al. Impact and experiences of delayed discharge: A  
541 mixed-studies systematic review. *Health Expect* 2018;21(1):41-56. doi:  
542 10.1111/hex.12619 [published Online First: 2017/09/12]
- 543 4. Barnable A, Welsh D, Lundrigan E, et al. Analysis of the Influencing Factors Associated With  
544 Being Designated Alternate Level of Care. *Home Health Care Management & Practice*  
545 2015;27(1):3-12. doi: 10.1177/1084822314539164
- 546 5. McCloskey R, Jarrett P, Stewart C, et al. Alternate level of care patients in hospitals: what  
547 does dementia have to do with this? *Canadian geriatrics journal : CGJ* 2014;17(3):88-  
548 94. doi: 10.5770/cgj.17.106
- 549 6. Walker H, Langton D, Thomson L. 'New to Forensic'; implementing a problem-based  
550 introductory educational programme for forensic practitioners in Scotland. *Journal of*  
551 *Psychiatric and Mental Health Nursing* 2011;18(10):934-42.
- 552 7. Jasinarachchi KH, Ibrahim IR, Keegan BC, et al. Delayed transfer of care from NHS  
553 secondary care to primary care in England: its determinants, effect on hospital bed days,  
554 prevalence of acute medical conditions and deaths during delay, in older adults aged 65  
555 years and over. *BMC Geriatr* 2009;9:4-4. doi: 10.1186/1471-2318-9-4
- 556 8. Rosman M, Rachminov O, Segal O, et al. Prolonged patients' In-Hospital Waiting Period after  
557 discharge eligibility is associated with increased risk of infection, morbidity and  
558 mortality: a retrospective cohort analysis. *BMC health services research* 2015;15:246-46.  
559 doi: 10.1186/s12913-015-0929-6
- 560 9. Overall AC, Guilcher SJT, Cadel L, et al. Patient and caregiver experience with delayed  
561 discharge from a hospital setting: A scoping review. *Health Expectations*  
562 2019;22(5):863-73. doi: 10.1111/hex.12916
- 563 10. Amy C, Zagorski B, Chan V, et al. Acute care alternate-level-of-care days due to delayed  
564 discharge for traumatic and non-traumatic brain injuries. *Healthcare policy = Politiques*  
565 *de sante* 2012;7(4):41-55.
- 566 11. Hwabejire JO, Kaafarani HA, Imam AM, et al. Excessively long hospital stays after trauma  
567 are not related to the severity of illness: Let's aim to the right target! *JAMA Surgery*  
568 2013;148(10):956-61. doi: 10.1001/jamasurg.2013.2148

- 1  
2  
3 569 12. Challis D, Hughes J, Xie C, et al. An examination of factors influencing delayed discharge of  
4 570 older people from hospital. *International Journal of Geriatric Psychiatry*  
5 571 2014;29(2):160-68. doi: 10.1002/gps.3983  
6  
7 572 13. Costa AP, Hirdes JP. Clinical Characteristics and Service Needs of Alternate-Level-of-Care  
8 573 Patients Waiting for Long-Term Care in Ontario Hospitals. *Healthcare policy =*  
9 574 *Politiques de sante* 2010;6(1):32-46.  
10  
11 575 14. Costa AP, Poss JW, Peirce T, et al. Acute care inpatients with long-term delayed-discharge:  
12 576 evidence from a Canadian health region. *BMC health services research* 2012;12(1):172.  
13  
14 577 15. Kozyrskiy A, De Coster C, St John P. Long stay patients in Winnipeg acute care hospitals.  
15 578 *Healthc Manage Forum* 2002;Suppl:15-20.  
16  
17 579 16. Di Lorenzo R, Formicola V, Carra E, et al. Risk factors for long-stay in an Italian acute  
18 580 psychiatric ward: a 7-year retrospective analysis. *Journal of Nursing Education and*  
19 581 *Practice* 2013;4(1):p68.  
20  
21 582 17. Rogers A, Clark EH, Rittenhouse K, et al. Breaking down the barriers! Factors contributing  
22 583 to barrier days in a mature trauma center. *Journal of Trauma and Acute Care Surgery*  
23 584 2014;76(1):191-95. doi: 10.1097/TA.0b013e3182aa3d5f  
24  
25 585 18. Mitchell F. Hospital Discharge: A Descriptive Study of the Patient Journey for Frail Older  
26 586 People with Complex Needs. *Journal of Integrated Care* 2010;18(3):30-36. doi:  
27 587 10.5042/jic.2010.0247  
28  
29 588 19. Tan WS, Chong WF, Chua KS, et al. Factors associated with delayed discharges after  
30 589 inpatient stroke rehabilitation in Singapore. *Annals of the Academy of Medicine,*  
31 590 *Singapore* 2010;39(6):435-41. [published Online First: 2010/07/14]  
32  
33 591 20. Landeiro F, Leal J, Gray AM. The impact of social isolation on delayed hospital discharges  
34 592 of older hip fracture patients and associated costs. *Osteoporos Int* 2016;27(2):737-45.  
35 593 doi: 10.1007/s00198-015-3293-9 [published Online First: 2015/09/05]  
36  
37 594 21. Poulos CJ, Magee C, Bashford G, et al. Determining level of care appropriateness in the  
38 595 patient journey from acute care to rehabilitation. *BMC health services research*  
39 596 2011;11:291-91. doi: 10.1186/1472-6963-11-291  
40  
41 597 22. Zeitz KM, Carter L, Robinson C. The ebbs and flows of changing acute bed capacity delays.  
42 598 *Aust Health Rev* 2013;37(1):66-9. doi: 10.1071/ah11077 [published Online First:  
43 599 2012/12/04]  
44  
45 600 23. Anderson ME, Glasheen JJ, Anoff D, et al. Understanding predictors of prolonged  
46 601 hospitalizations among general medicine patients: A guide and preliminary analysis. *J*  
47 602 *Hosp Med* 2015;10(9):623-6. doi: 10.1002/jhm.2414 [published Online First:  
48 603 2015/07/02]  
49  
50  
51  
52  
53  
54  
55  
56  
57  
58  
59  
60

- 1  
2  
3 604 24. Hendy P, Patel JH, Kordbacheh T, et al. In-depth analysis of delays to patient discharge: a  
4 605 metropolitan teaching hospital experience. *Clin Med (Lond)* 2012;12(4):320-3. doi:  
5 606 10.7861/clinmedicine.12-4-320 [published Online First: 2012/08/31]  
6  
7  
8 607 25. Salonga-Reyes A, Scott IA. Stranded: causes and effects of discharge delays involving non-  
9 608 acute in-patients requiring maintenance care in a tertiary hospital general medicine  
10 609 service. *Aust Health Rev* 2017;41(1):54-62. doi: 10.1071/ah15204 [published Online  
11 610 First: 2016/03/31]  
12  
13 611 26. Sutherland JM, Repin N, Crump RT, et al. Paying for Hospital Services: A Hard Look at the  
14 612 Options. Toronto, Canada: CD Howe Institute, 2013:1-32.  
15  
16 613 27. Sutherland J. Hospital payment policy in Canada: Options for the future: Canadian Health  
17 614 Services Research Foundation, 2011.  
18  
19 615 28. Ontario Ministry of Health and Long-Term Care. Quality-Based Procedures Indicators: An  
20 616 Implementation Guidance Document. Ontario, Canada, 2014:1-38.  
21  
22 617 29. David G, Polsky D. Home Health Services, Economics of. In: Culyer AJ, ed. Encyclopedia  
23 618 of Health Economics. San Diego: Elsevier 2014:477-83.  
24  
25 619 30. HM Treasury. Spring Budget 2017. United Kingdom, 2017.  
26  
27 620 31. Knowles G, Burke MR, Carr M, et al. Independent Expert Review of Delayed Discharges:  
28 621 Department of Health, 2018.  
29  
30 622 32. Fagan L. 'Bed blockers' costing Ottawa hospitals millions. Glut of patients awaiting more  
31 623 appropriate care a 'crisis,' health workers say. Ottawa: CBC News, 2019.  
32  
33 624 33. McCloskey R, Jarrett P, Stewart C. The Untold Story of Being Designated an Alternate Level  
34 625 of Care Patient. *Healthcare policy = Politiques de sante* 2015;11(1):76-89.  
35  
36 626 34. Munn Z, Peters MDJ, Stern C, et al. Systematic review or scoping review? Guidance for  
37 627 authors when choosing between a systematic or scoping review approach. *BMC Medical*  
38 628 *Research Methodology* 2018;18(1):143. doi: 10.1186/s12874-018-0611-x  
39  
40 629 35. Levac D, Colquhoun H, O'Brien KK. Scoping studies: advancing the methodology.  
41 630 *Implementation Science* 2010;5(1):69. doi: 10.1186/1748-5908-5-69  
42  
43 631 36. Tricco AC, Lillie E, Zarin W, et al. PRISMA Extension for Scoping Reviews (PRISMA-  
44 632 ScR): Checklist and ExplanationThe PRISMA-ScR Statement. *Annals of Internal*  
45 633 *Medicine* 2018;169(7):467-73. doi: 10.7326/M18-0850  
46  
47 634 37. Bramer WM, Giustini D, de Jonge GB, et al. De-duplication of database search results for  
48 635 systematic reviews in EndNote. *J Med Libr Assoc* 2016;104(3):240-43. doi:  
49 636 10.3163/1536-5050.104.3.014  
50  
51  
52  
53  
54  
55  
56  
57  
58  
59  
60

- 1  
2  
3 637 38. Babineau J. Product review: Covidence (systematic review software). *Journal of the*  
4 638 *Canadian Health Libraries Association/ Journal de l'Association des bibliothèques de la*  
5 639 *santé du Canada* 2014;35(2):68-71.
- 6  
7 640 39. Hosseus D, Pal LA. Anatomy of a Policy Area: The Case of Shipping. *Canadian Public*  
8 641 *Policy / Analyse de Politiques* 1997;23(4):399-415. doi: 10.2307/3552071
- 9  
10  
11 642 40. Adlington K, Brown J, Ralph L, et al. Better care: reducing length of stay and bed occupancy  
12 643 on an older adult psychiatric ward. *BMJ open quality* 2018;7(4):e000149. doi:  
13 644 <https://dx.doi.org/10.1136/bmj-oq-2017-000149>
- 14  
15 645 41. Boyd SS. Hospital Administrators' Strategies for Reducing Delayed Hospital Discharges and  
16 646 Improving Profitability. *Hospital Administrators' Strategies for Reducing Delayed*  
17 647 *Hospital Discharges & Improving Profitability* 2017:1-1.
- 18  
19  
20 648 42. Caminiti C, Meschi T, Braglia L, et al. Reducing unnecessary hospital days to improve  
21 649 quality of care through physician accountability: a cluster randomised trial. *BMC health*  
22 650 *services research* 2013;13(1):14-14. doi: 10.1186/1472-6963-13-14
- 23  
24 651 43. Patel H, Yirdaw E, Yu A, et al. Improving Early Discharge Using a Team-Based Structure  
25 652 for Discharge Multidisciplinary Rounds. *Professional Case Management* 2019;24(2):83-  
26 653 89. doi: <http://dx.doi.org/10.1097/NCM.0000000000000318>
- 27  
28  
29 654 44. Pirani SSA. Prevention of delay in the patient discharge process: an emphasis on nurses' role.  
30 655 *Journal for Nurses in Staff Development* 2010;26(4):E1-5. doi:  
31 656 10.1097/NND.0b013e3181b1ba74
- 32  
33 657 45. Sutherland JM, Crump RT. Alternative Level of Care: Canada's Hospital Beds, the Evidence  
34 658 and Options. *Healthcare Policy* 2013;9(1):26-34.
- 35  
36  
37 659 46. Anonymous. Patient flow initiatives decrease LOS, up capacity. *Hospital case management :*  
38 660 *the monthly update on hospital-based care planning and critical paths* 2010;18(8):117-  
39 661 24.
- 40  
41 662 47. Brankline AL, Coyle CM, Jencks KA, et al. Practical innovations: technology-assisted  
42 663 referrals. *Social Work in Health Care* 2009;48(8):768-76. doi:  
43 664 10.1080/00981380902958213
- 44  
45 665 48. Henwood M. Effective partnership working: A case study of hospital discharge. *Health and*  
46 666 *Social Care in the Community* 2006;14(5):400-07. doi: [http://dx.doi.org/10.1111/j.1365-](http://dx.doi.org/10.1111/j.1365-2524.2006.00651.x)  
47 667 [2524.2006.00651.x](http://dx.doi.org/10.1111/j.1365-2524.2006.00651.x)
- 48  
49  
50 668 49. Maloney CG, Wolfe D, Gesteland PH, et al. A tool for improving patient discharge process  
51 669 and hospital communication practices: the "Patient Tracker". *AMIA Annual Symposium*  
52 670 *proceedings / AMIA Symposium AMIA Symposium* 2007:493-97.
- 53  
54  
55  
56  
57  
58  
59  
60



- 1  
2  
3 671 50. Roberts K, Stiller K, Harling R, et al. Impacts and perceptions of a computer-based length of  
4 672 stay benchmarking program. *International Journal of Therapy & Rehabilitation*  
5 673 2013;20(5):237-45.
- 6  
7 674 51. Sobotka SA, Agrawal RK, Msall ME. Prolonged Hospital Discharge for Children with  
8 675 Technology Dependency: A Source of Health Care Disparities. *Pediatric Annals*  
9 676 2017;46(10):e365-e70. doi: 10.3928/19382359-20170919-01
- 10  
11  
12 677 52. Williams TA, Leslie GD, Brearley L, et al. Discharge delay, room for improvement?  
13 678 *Australian Critical Care* 2010;23(3):141-49. doi: 10.1016/j.aucc.2010.02.003
- 14  
15 679 53. Younis J, Salerno G, Fanto D, et al. Focused preoperative patient stoma education, prior to  
16 680 ileostomy formation after anterior resection, contributes to a reduction in delayed  
17 681 discharge within the enhanced recovery programme. *International journal of colorectal*  
18 682 *disease* 2011:1-5. doi: <http://dx.doi.org/10.1007/s00384-011-1252-2>
- 19  
20  
21 683 54. Chidwick P, Oliver J, Ball D, et al. Six Change Ideas that Significantly Minimize Alternate  
22 684 Level of Care (ALC) Days in Acute Care Hospitals. *Healthcare quarterly (Toronto, Ont)*  
23 685 2017;20(2):37-43.
- 24  
25 686 55. Baumann M, Evans S, Perkins M, et al. Organisation and features of hospital, intermediate  
26 687 care and social services in English sites with low rates of delayed discharge. *Health &*  
27 688 *Social Care in the Community* 2007;15(4):295-305.
- 28  
29  
30 689 56. Burr E, Dickau S. Leading Practices in Alternate Level of Care (ALC) Avoidance: A  
31 690 Standardized Approach. *Healthcare quarterly (Toronto, Ont)* 2017;20(2):44-47.
- 32  
33 691 57. Holland DE, Pacyna JE, Gillard KL, et al. Tracking Discharge Delays: Critical First Step  
34 692 Toward Mitigating Process Breakdowns and Inefficiencies. *Journal of Nursing Care*  
35 693 *Quality* 2016;31(1):17-23. doi: <http://dx.doi.org/10.1097/NCQ.0000000000000141>
- 36  
37  
38 694 58. Lian YC, Ying SHK, Peng CC, et al. Early discharge study for premature infants: singapore  
39 695 general hospital. *The Permanente journal* 2008;12(4):15-18.
- 40  
41 696 59. Mahant S, Peterson R, Campbell M, et al. Reducing inappropriate hospital use on a general  
42 697 pediatric inpatient unit. *Pediatrics* 2008;121(5):e1068-73.
- 43  
44 698 60. Moeller JJ, Ma M, Hernandez P, et al. Discharge delay in patients with community-acquired  
45 699 pneumonia managed on a critical pathway. *Canadian Journal of Infectious Diseases and*  
46 700 *Medical Microbiology* 2006;17(2):109-13. doi: <http://dx.doi.org/10.1155/2006/375645>
- 47  
48  
49 701 61. Mur-Veeman I, Govers M. Buffer management to solve bed-blocking in the Netherlands  
50 702 2000-2010. Cooperation from an integrated care chain perspective as a key success factor  
51 703 for managing patient flows. *International journal of integrated care* 2011;11(Spec 10th  
52 704 Anniversary Ed):e080.
- 53  
54  
55  
56  
57  
58  
59  
60

- 1  
2  
3 705 62. Niemeijer GC, Trip A, Ahaus KT, et al. Quality in trauma care: improving the discharge  
4 706 procedure of patients by means of Lean Six Sigma. *Journal of Trauma* 2010;69(3):614-  
5 707 19. doi: 10.1097/TA.0b013e3181e70f90
- 7 708 63. Ardagh M, Tonkin G, Possenniskie C. Improving acute patient flow and resolving  
8 709 emergency department overcrowding in New Zealand hospitals-the major challenges and  
9 710 the promising initiatives. *New Zealand Medical Journal* 2011;124(1344):64-73.
- 11 711 64. Brown I, Jellish WS, Kleinman B, et al. Use of postanesthesia discharge criteria to reduce  
12 712 discharge delays for inpatients in the postanesthesia care unit. *Journal of Clinical*  
13 713 *Anesthesia* 2008;20(3):175-79. doi: <http://dx.doi.org/10.1016/j.jclinane.2007.09.014>
- 15 714 65. Gutmanis I, Speziale J, Van Bussel L, et al. The South West Local Health Integration  
16 715 Network Behavioural Supports Ontario Experience. *Healthcare quarterly (Toronto, Ont)*  
17 716 2016;18:50-56.
- 19 717 66. Lees-Deutsch L, Jackson J, Balaji DA, et al. Developing a Process for Criteria-Led  
20 718 Discharge: Selection of Patients for Efficient and Effective Discharge (SPEED). *Journal*  
21 719 *of Nursing Care Quality* 2019 doi: <http://dx.doi.org/10.1097/NCQ.0000000000000423>
- 23 720 67. Toronto Central Community Care Access Centre. ALC Avoidance Leading Practices and  
24 721 Improvement Strategies for the Acute Care Sector. Ontario, Canada, 2015.
- 26 722 68. Arendts G, Fitzhardinge S, Pronk K, et al. Front-loading allied health intervention in the  
27 723 emergency department does not reduce length of stay for admitted older patients.  
28 724 *International Journal of Clinical Practice* 2013;67(8):807-10. doi: 10.1111/ijcp.12153
- 30 725 69. Béland F, Bergman H, Lebel P, et al. A system of integrated care for older persons with  
31 726 disabilities in Canada: results from a randomized controlled trial. *Journals of*  
32 727 *Gerontology Series A: Biological Sciences & Medical Sciences* 2006;61(4):367-73.
- 34 728 70. Blecker S, Goldfeld K, Park H, et al. Impact of an Intervention to Improve Weekend Hospital  
35 729 Care at an Academic Medical Center: An Observational Study. *JGIM: Journal of*  
36 730 *General Internal Medicine* 2015;30(11):1657-64. doi: 10.1007/s11606-015-3330-6
- 38 731 71. Boutette M, Hoffer A, Plant J, et al. Establishing an integrated model of subacute care for the  
39 732 frail elderly. *Healthcare Management Forum* 2018;31(4):133-36. doi:  
40 733 10.1177/0840470418774807
- 42 734 72. Bowen A, Kumar R, Howard J, et al. Nurse led discharge: improving efficiency, safely.  
43 735 *Clinical Governance: An International Journal* 2013;19(2):110-16. doi: 10.1108/CGIJ-  
44 736 03-2013-0007
- 46 737 73. El-Eid GR, Kaddoum R, Tamim H, et al. Improving hospital discharge time: a successful  
47 738 implementation of Six Sigma methodology. *Medicine* 2015;94(12):e633-e33. doi:  
48 739 10.1097/MD.0000000000000633

- 1  
2  
3 740 74. Graham L, Neal CP, Garcea G, et al. Evaluation of nurse-led discharge following  
4 741 laparoscopic surgery. *Journal of Evaluation in Clinical Practice* 2012;18(1):19-24. doi:  
5 742 10.1111/j.1365-2753.2010.01510.x  
6  
7  
8 743 75. Maessen JMC, Dejong CHC, Kessels AGH, et al. Length of stay: An inappropriate readout  
9 744 of the success of enhanced recovery programs. *World journal of surgery* 2008;32(6):971-  
10 745 75. doi: <http://dx.doi.org/10.1007/s00268-007-9404-9>  
11  
12 746 76. Mahto R, Venugopal H, Vibhuti VS, et al. The effectiveness of a hospital diabetes outreach  
13 747 service in supporting care for acutely admitted patients with diabetes. *QJM*  
14 748 2009;102(3):203-07. doi: <http://dx.doi.org/10.1093/qjmed/hcn174>  
15  
16 749 77. Meehan L, Banarsee R, Dunn-Toroosian V, et al. Improving outcomes for patients  
17 750 discharged early using a home assessment scheme. *London journal of primary care*  
18 751 2018;10(3):62-67. doi: <http://dx.doi.org/10.1080/17571472.2018.1489467>  
19  
20  
21 752 78. Panis LJ, Verheggen FW, Pop P, et al. The impact of hospital discharge on inappropriate  
22 753 hospital stay. *International journal of health care quality assurance incorporating*  
23 754 *Leadership in health services* 2004;17(4-5):189-93.  
24  
25 755 79. Sampson MJ, Crowle T, Dhatariya K, et al. Trends in bed occupancy for inpatients with  
26 756 diabetes before and after the introduction of a diabetes inpatient specialist nurse service.  
27 757 *Diabetic Medicine* 2006;23(9):1008-15.  
28  
29  
30 758 80. Starr-Hemburrow L, Parks JM, Bisailon S. Home First: reducing ALC and achieving better  
31 759 outcomes for seniors through inter-organizational collaboration. *Healthcare quarterly*  
32 760 *(Toronto, Ont)* 2011;14(1):70-76.  
33  
34 761 81. Taber DJ, Pilch NA, McGillicuddy JW, et al. Improved Patient Safety and Outcomes With a  
35 762 Comprehensive Interdisciplinary Improvement Initiative in Kidney Transplant  
36 763 Recipients. *American Journal of Medical Quality* 2013;28(2):103-12. doi:  
37 764 <http://dx.doi.org/10.1177/1062860612450309>  
38  
39  
40 765 82. Udayai K, Kumar P. Implementing six sigma to improve hospital discharge process.  
41 766 *International Journal of Pharmaceutical Sciences and Research* 2012;3(11):4528-32.  
42  
43 767 83. Calveley P. Doing, not talking: hospital admission avoidance. *Nursing & Residential Care*  
44 768 2007;9(5):230-32.  
45  
46 769 84. Central East LHIN ALC Task Group. Alternate Level of Care Systems Issues and  
47 770 Recommendations. Ontario, Canada, 2008.  
48  
49  
50 771 85. Joint Improvement Team. Home First - Ten Actions to Transform Discharge. United  
51 772 Kingdom, 2013.  
52  
53 773 86. Krystal A. Southlake at Home Webinar. Canada, 2019.  
54  
55  
56  
57  
58  
59  
60

- 1  
2  
3 774 87. LHIN Collaborative. Sharing Best Practices: Transition Management in Ontario - Home  
4 775 First: Implementation Guide and Toolkit. Ontario, Canada, 2011.  
5  
6 776 88. North West Community Care Access Centre. Wait at Home Fact Sheet Ontario, Canada 2011  
7 777 [
- 8  
9  
10 778 89. Shah N. A New Philosophy Towards Solving The ALC Crisis (Home First). Ontario,  
11 779 Canada, 2010.  
12
- 13 780 90. Shah N. A Call to Action on ER/ALC: Promoting Effective Care Across the Health  
14 781 Continuum. Ontario, Canada, 2011.  
15
- 16 782 91. Starr-Hemburrow L. Home First - Optimizing Patient Flow and Patient Centred Care Canada,  
17 783 2010.  
18
- 19 784 92. Province of New Brunswick. Health Annual Report 2016-2017. New Brunswick, Canada,  
20 785 2017.  
21  
22
- 23 786 93. Behan D. Delayed transfers of care -- an early review of progress. *Journal of Integrated Care*  
24 787 2005;13(1):43-47.  
25
- 26 788 94. Levin KA, Crighton E. Measuring the impact of step down intermediate care on delayed  
27 789 discharge: an interrupted time series analysis. *Journal of epidemiology and community*  
28 790 *health* 2019;73(7):674-79. doi: <http://dx.doi.org/10.1136/jech-2018-211628>  
29
- 30 791 95. Manville M, Klein MC, Bainbridge L. Improved outcomes for elderly patients who received  
31 792 care on a transitional care unit. *Canadian Family Physician* 2014;60(5):e263-71.  
32  
33
- 34 793 96. Rae B, Busby W, Millard PH. Fast-tracking acute hospital care - from bed crisis to bed crisis.  
35 794 *Australian Health Review* 2007;31(1):50-62.  
36
- 37 795 97. Shah A. The impact of the community care (delayed discharge) act 2003 on the length of stay  
38 796 and bed occupancy in old age psychiatry units in England. *International Journal of*  
39 797 *Geriatric Psychiatry* 2007;22(11):1164-65. doi: <http://dx.doi.org/10.1002/gps.1808>  
40
- 41 798 98. Adams S, Care & Repair England. Reducing Delayed Transfer of Care through housing  
42 799 interventions: Evidence of Impact. United Kingdom, 2017.  
43  
44
- 45 800 99. Anonymous. Expedited discharge fund helps uninsured patients. Plan frees up beds for  
46 801 patients who can pay. *Hospital case management : the monthly update on hospital-based*  
47 802 *care planning and critical paths* 2008;16(5):70-75.  
48
- 49 803 100. Manzano-Santaella A. Payment by Results and delayed discharges...including commentary  
50 804 by Allen P. *British Journal of Healthcare Management* 2009;15(9):440-43.  
51  
52
- 53 805 101. Gaughan J, Gravelle H, Siciliani L. Testing the bed-blocking hypothesis: Does nursing and  
54 806 care home supply reduce delayed hospital discharges? *Health Economics (United*  
55 807 *Kingdom)* 2015;24(S1):32-44. doi: <http://dx.doi.org/10.1002/hec.3150>  
56  
57  
58  
59  
60

- 1  
2  
3 808 102. Katsaliaki K, Brailsford S, Browning D, et al. Mapping care pathways for the elderly.  
4 809 *Journal of Health, Organisation and Management* 2005;19(1):57-72. doi:  
5 810 <http://dx.doi.org/10.1108/14777260510592130>  
6  
7  
8 811 103. Qin S, Thompson C, Bogomolov T, et al. Hospital occupancy and discharge strategies: a  
9 812 simulation-based study. *Internal medicine journal* 2017;47(8):894-99. doi:  
10 813 <http://dx.doi.org/10.1111/imj.13485>  
11  
12 814 104. NHS Improvement. Guide to Reducing Long Hospital Stays. United Kingdom, 2018.  
13  
14 815 105. Hamilton AB, Finley EP. Qualitative methods in implementation research: An introduction.  
15 816 *Psychiatry Research* 2019;280:112516. doi:  
16 817 <https://doi.org/10.1016/j.psychres.2019.112516>  
18  
19 818 106. Southam-Gerow MA, Dorsey S. Qualitative and mixed methods research in dissemination  
20 819 and implementation science: introduction to the special issue. *J Clin Child Adolesc*  
21 820 *Psychol* 2014;43(6):845-50. doi: 10.1080/15374416.2014.930690 [published Online  
22 821 First: 2014/10/29]  
23  
24 822 107. Qualitative Research in Implementation Science group. Qualitative Methods in  
25 823 Implementation Science. United States: National Cancer Institute: Division of Cancer  
26 824 Control and Population Sciences, 2019:1-31.  
27  
28  
29 825 108. Shelton RC, Cooper BR, Stirman SW. The Sustainability of Evidence-Based Interventions  
30 826 and Practices in Public Health and Health Care. *Annual Review of Public Health*  
31 827 2018;39(1):55-76. doi: 10.1146/annurev-publhealth-040617-014731  
32  
33 828 109. Geerligs L, Rankin NM, Shepherd HL, et al. Hospital-based interventions: a systematic  
34 829 review of staff-reported barriers and facilitators to implementation processes.  
35 830 *Implementation science : IS* 2018;13(1):36-36. doi: 10.1186/s13012-018-0726-9  
36  
37  
38 831 110. Green LW, Glasgow RE. Evaluating the relevance, generalization, and applicability of  
39 832 research: issues in external validation and translation methodology. *Evaluation & the*  
40 833 *health professions* 2006;29(1):126-53. doi: 10.1177/0163278705284445 [published  
41 834 Online First: 2006/03/03]  
42  
43 835 111. Balasubramanian BA, Cohen DJ, Davis MM, et al. Learning Evaluation: blending quality  
44 836 improvement and implementation research methods to study healthcare innovations.  
45 837 *Implementation Science* 2015;10(1):31. doi: 10.1186/s13012-015-0219-z  
46  
47  
48 838 112. Glasby J, Littlechild R, Pryce K. Show Me the Way to go Home: A Narrative Review of the  
49 839 Literature on Delayed Hospital Discharges and Older People. *The British Journal of*  
50 840 *Social Work* 2004;34(8):1189-97. doi: 10.1093/bjsw/bch136  
51  
52 841 113. Zhao G, Kennedy C, Mabaya G, et al. Patient engagement in the development of best  
53 842 practices for transitions from hospital to home: a scoping review. *BMJ Open*  
54 843 2019;9(8):e029693. doi: 10.1136/bmjopen-2019-029693  
55  
56  
57  
58  
59  
60

844 **Tables**845 **Table 1. Categories, descriptions and examples of initiative categorization**

| Category Name                                                                                   | Description                                                                                                                                                                                                                                                                                        | Examples                                                                                                                                                                                                                                                                                                                                         |
|-------------------------------------------------------------------------------------------------|----------------------------------------------------------------------------------------------------------------------------------------------------------------------------------------------------------------------------------------------------------------------------------------------------|--------------------------------------------------------------------------------------------------------------------------------------------------------------------------------------------------------------------------------------------------------------------------------------------------------------------------------------------------|
| <b>Information Sharing</b><br>A - Live Sharing<br>B - Recommended Initiatives – Calls to Action | <ul style="list-style-type: none"> <li>• A - Information sharing through in-person or technology-based communication (synchronous communication)</li> <li>• B - Information sharing through documents which share suggestions, recommendations or for information purposes (motivation)</li> </ul> | <ul style="list-style-type: none"> <li>• A - Rounding, team meetings, one-on-one communication</li> <li>• B - Examples: Suggested strategies (or “Calls to Action”) which ranged from recommending investments in new long-term care beds, increasing funding for behavioural supports, audits and reports, encouraging team building</li> </ul> |
| <b>Tools and Guidelines</b>                                                                     | <ul style="list-style-type: none"> <li>• Tangible/ concrete guides to inform practice</li> <li>• Implemented tool/ guidance document that is being used in the healthcare system</li> </ul>                                                                                                        | <ul style="list-style-type: none"> <li>• Toolkits, guidelines, tools, escalation processes, frameworks</li> </ul>                                                                                                                                                                                                                                |
| <b>Practice Change</b>                                                                          | <ul style="list-style-type: none"> <li>• A change in how care is delivered</li> </ul>                                                                                                                                                                                                              | <ul style="list-style-type: none"> <li>• Nurse led discharges, roles of providers and/or composition of team are organized differently</li> </ul>                                                                                                                                                                                                |
| <b>Infrastructure and Finances</b>                                                              | <ul style="list-style-type: none"> <li>• Tangible structural or financial changes</li> </ul>                                                                                                                                                                                                       | <ul style="list-style-type: none"> <li>• Financial penalties/ incentives, building more hospital, rehabilitation or long-term care beds</li> </ul>                                                                                                                                                                                               |
| <b>Other Initiatives</b>                                                                        | <ul style="list-style-type: none"> <li>• Different initiative that does not fit into any of the above categories</li> </ul>                                                                                                                                                                        | <ul style="list-style-type: none"> <li>• Statistical models (predictive modelling)</li> </ul>                                                                                                                                                                                                                                                    |

846

847 **Table 2. Characteristics of Included Articles**

| Author (Year)                         | Country        | Objective                                                                                                                                                        | Method       | Study Design                               | Participants                                                                                                                                                                                                                         | Sample Size |
|---------------------------------------|----------------|------------------------------------------------------------------------------------------------------------------------------------------------------------------|--------------|--------------------------------------------|--------------------------------------------------------------------------------------------------------------------------------------------------------------------------------------------------------------------------------------|-------------|
| <b>Database Searches</b>              |                |                                                                                                                                                                  |              |                                            |                                                                                                                                                                                                                                      |             |
| Adlington et al. (2018) <sup>40</sup> | United Kingdom | Reduce length of stay, bed occupancy and delays in discharge and promote care in the appropriate setting among functional older adults on a psychiatric ward     | Quantitative | Quality Improvement                        | Older adults (65+) on psychiatric ward                                                                                                                                                                                               | NR          |
| Ardagh et al. (2011) <sup>63</sup>    | New Zealand    | Identify 10 common challenges and promising initiatives relating to patient flow and emergency department overcrowding                                           | Qualitative  | NR                                         | NR                                                                                                                                                                                                                                   | NR          |
| Arendts et al. (2013) <sup>68</sup>   | Australia      | Determine if hospital length of stay for older patients is reduced when an allied health intervention is introduced in the emergency department (ED)             | Quantitative | Non-randomized prospective pragmatic study | ED patients (65+) diagnosed with one or more of six conditions (cerebrovascular insufficiency; fractured neck of femur; cardiac failure; myocardial ischaemia; exacerbation of chronic airways disease; respiratory tract infection) | 3,572       |
| Baumann et al. (2007) <sup>55</sup>   | United Kingdom | Identify the factors causing good discharge practice performance and organization of services                                                                    | Qualitative  | Descriptive                                | Health and social services staff who had managerial or operational involvement in discharge arrangements                                                                                                                             | 42          |
| Behan (2005) <sup>93</sup>            | United Kingdom | Explore the experience of service users across the United Kingdom during the first 6 months of the implementation of the Community Care (Delayed Discharges) Act | Qualitative  | Explorative                                | NR                                                                                                                                                                                                                                   | NR          |

| Author (Year)                        | Country        | Objective                                                                                                                                       | Method       | Study Design                                | Participants                                                                                                        | Sample Size |
|--------------------------------------|----------------|-------------------------------------------------------------------------------------------------------------------------------------------------|--------------|---------------------------------------------|---------------------------------------------------------------------------------------------------------------------|-------------|
| Béland et al. (2006) <sup>69</sup>   | Canada         | Assess the transformation of the organization and delivery of health and social services with additional interventions for frail elderly people | Quantitative | Randomized controlled trial                 | Frail elderly                                                                                                       | 1,309       |
| Blecker et al. (2015) <sup>70</sup>  | United States  | Evaluate the impact of a weekend hospital intervention on care processes, clinical outcomes and length of stay                                  | Quantitative | Interrupted time series observational study | Non-obstetric patients hospitalized                                                                                 | 57,163      |
| Boutette et al. (2018) <sup>71</sup> | Canada         | Serve frail elderly patients at risk of deconditioning and/or disability, caused by prolonged hospitalization                                   | NR           | Review/description of program               | Frail older patients who are at risk of deconditioning and/or disability                                            | NR          |
| Bowen et al. (2014) <sup>72</sup>    | United Kingdom | Demonstrate that nurse led discharges can improve efficiency on a short stay surgical ward, without impacting patients safety                   | Quantitative | Case study                                  | Adult ear, nose, throat patients having routine, elective, short stay surgery                                       | 265         |
| Boyd (2017) <sup>41</sup>            | United States  | Explore the leadership strategies used by hospital business administrators to reduce delayed discharges and improve profitability               | Qualitative  | Multiple case study                         | Hospital administrators                                                                                             | 3           |
| Brankline (2009) <sup>47</sup>       | United States  | Provide the appropriate level of care and patient choice when the patient is medically ready for transfer                                       | Quantitative | Pilot Study                                 | Medical floors with primarily elderly patients who require nursing home placement after dismissal from the hospital | 25          |
| Brown et al. (2008) <sup>64</sup>    | United States  | Determine if the length of patient stay is reduced in the post-anesthesia care unit when nurses use discharge criteria                          | Quantitative | Prospective clinical study                  | Adult, ASA physical status I, II, and III patients (18+) requiring general anesthesia                               | 1,198       |
| Burr et al. (2017) <sup>56</sup>     | Canada         | Develop a framework that would support ALC avoidance strategies across the Toronto Central Local Health Integration Network                     | Case Study   | Case study                                  | ALC patients                                                                                                        | 3 hospitals |



| Author (Year)                            | Country        | Objective                                                                                                                                   | Method        | Study Design                                                         | Participants                                                                  | Sample Size |
|------------------------------------------|----------------|---------------------------------------------------------------------------------------------------------------------------------------------|---------------|----------------------------------------------------------------------|-------------------------------------------------------------------------------|-------------|
| Caminiti et al. (2013) <sup>42</sup>     | Italy          | Evaluate the effectiveness of a strategy aimed to reduce delayed hospital discharge                                                         | Quantitative  | Cluster, parallel group, randomized trial<br><br>Quality improvement | Hospital units: geriatric, medicine, long-term care                           | 3,498       |
| Chidwick et al. (2017) <sup>54</sup>     | Canada         | Discuss concepts and ideas that led to lowest ALC days in the province                                                                      | Mixed methods | Quality improvement                                                  | ALC patients                                                                  | NR          |
| El-Eid et al. (2015) <sup>73</sup>       | Lebanon        | Assess the effectiveness of the Six Sigma method in improving discharge processes                                                           | Quantitative  | Pre and post-intervention study                                      | NR                                                                            | 17,054      |
| Gaughan et al. (2015) <sup>101</sup>     | England        | Investigate the reduction in hospital bed-blocking due to a greater supply of nursing home beds or reduced costs                            | Quantitative  | Statistical modelling - Empirical analysis                           | Patients waiting for hospital discharge                                       | NR          |
| Graham et al. (2012) <sup>74</sup>       | United Kingdom | Evaluate the effect of the laparoscopic nurse specialist on patient discharge                                                               | Quantitative  | Retrospective comparison                                             | Laparoscopic cholecystectomy and laparoscopic inguinal hernia repair patients | 128         |
| Gutmanis et al. (2016) <sup>65</sup>     | Canada         | Outline change strategies and their impact health system transformation and those living with responsive behaviors and their family members | Mixed methods | Quality improvement                                                  | Individuals with responsive behaviors                                         | NR          |
| Henwood (2006) <sup>48</sup>             | United Kingdom | Examine the partnership between health and social care by exploring issues with hospital discharges                                         | Case study    | Case study                                                           | Inpatients                                                                    | NR          |
| Holland et al. (2016) <sup>57</sup>      | United States  | Report the development and evaluation of a discharge delay tracking and reporting mechanism                                                 | Quantitative  | Practice improvement project                                         | Inpatients                                                                    | NR          |
| Katsaliaki et al. (2005) <sup>102</sup>  | United Kingdom | Describe a project investigating potential care pathways for elderly people after discharge from hospital                                   | Quantitative  | Discrete-event simulation, simulation model                          | Inpatients                                                                    | NR          |
| Lees-Deutsch et al. (2019) <sup>66</sup> | United Kingdom | Identify core characteristics of patient discharge criteria, recorded in clinical management plans or case notes                            | Quantitative  | Systematic observational                                             | Patients discharged from the acute                                            | 50          |

| Author (Year)                          | Country        | Objective                                                                                                                           | Method        | Study Design                                           | Participants                                      | Sample Size |
|----------------------------------------|----------------|-------------------------------------------------------------------------------------------------------------------------------------|---------------|--------------------------------------------------------|---------------------------------------------------|-------------|
|                                        |                |                                                                                                                                     |               | retrospective review                                   | medicine unit and short-stay units                |             |
| Levin et al. (2019) <sup>94</sup>      | Scotland       | Examine the impact of Intermediate Care and the 72-hour target on delayed hospital discharge                                        | Quantitative  | Controlled interrupted time series design              | Patients aged 75+                                 | 107,022     |
| Lian et al. (2008) <sup>58</sup>       | Singapore      | Develop methods to reduce the hospital length of stay for premature infants by 30%, within 6 months                                 | Quantitative  | Retrospective review                                   | Premature infants                                 | 78          |
| Maessen et al. (2008) <sup>75</sup>    | Netherlands    | Assess the effect of enhanced recovery after surgery program on discharge delays                                                    | Quantitative  | Retrospective/prospective study                        | Patients undergoing elective colorectal resection | 173         |
| Mahant et al. (2008) <sup>59</sup>     | Canada         | Determine if an audit-and-feedback intervention reduces delayed discharge in a general pediatric inpatient unit                     | Quantitative  | Prospective observational study                        | Pediatric inpatient                               | 3194        |
| Mahto et al. (2009) <sup>76</sup>      | United Kingdom | Determine the effect of a diabetes outreach service on delayed discharges and avoidable admissions                                  | Quantitative  | Cross-sectional audit                                  | Acutely admitted patients with diabetes           | 137         |
| Maloney et al. (2007) <sup>49</sup>    | United States  | Develop a web-based software application used to facilitate timely patient discharge                                                | Quantitative  | Quality improvement pilot project                      | Inpatients                                        | NR          |
| Manville et al. (2014) <sup>95</sup>   | Canada         | Determine if providing interdisciplinary care on a transitional care unit will result in improved clinical outcomes and lower costs | Quantitative  | Before-and-after structured retrospective chart audit  | Elderly ALC patients (70+)                        | 135         |
| Meehan et al. (2018) <sup>77</sup>     | United Kingdom | Explore patients' experiences of hospital discharge with the discharge to assess scheme                                             | Qualitative   | Descriptive                                            | Patients discharged through discharge to assess   | 30          |
| Moeller et al. (2006) <sup>60</sup>    | Canada         | Assess patient and physician-related barriers to discharging patients who have met objective criteria                               | Mixed methods | Retrospective assessment<br>Semi-structured interviews | Patients with community-acquired pneumonia        | 31          |
| Mur-Veeman et al. (2011) <sup>61</sup> | Netherlands    | Explain the theory of buffer management and discuss related previous assumptions                                                    | NR            | Review/theoretical paper                               | Bed blockers                                      | NR          |

| Author (Year)                         | Country       | Objective                                                                                                                       | Method        | Study Design                                                                                           | Participants                                                            | Sample Size                                                       |
|---------------------------------------|---------------|---------------------------------------------------------------------------------------------------------------------------------|---------------|--------------------------------------------------------------------------------------------------------|-------------------------------------------------------------------------|-------------------------------------------------------------------|
| Niemeijer et al. (2010) <sup>62</sup> | Netherlands   | Reduce the average length of stay to create more admission capacity and reduce costs                                            | Mixed methods | Efficiency improvement project<br><br>Retrospective and prospective data collection<br><br>Observation | Trauma patients                                                         | 2006:1114<br><br>2007:1124                                        |
| Panis et al. (2004) <sup>78</sup>     | Netherlands   | Reduce inappropriate hospital stay by adjusting patient logistics, increasing efficiency and providing comfortable surroundings | Quantitative  | Retrospective cohort study                                                                             | Mothers of newborn patients                                             | 2,889 days of hospital stay of gynecology and obstetrics patients |
| Patel et al. (2019) <sup>43</sup>     | United States | Evaluate the impact of team-based multidisciplinary rounds on discharge planning and care efficiency                            | Mixed methods | Quality improvement initiative                                                                         | Dissatisfied patients with delayed discharge                            | 1584                                                              |
| Pirani (2010) <sup>44</sup>           | Pakistan      | Emphasize the role of nurses to determine factors leading to a lack of discharge planning                                       | NR            | Review/summary                                                                                         | Those experiencing delayed discharge                                    | NR                                                                |
| Qin et al. (2017) <sup>103</sup>      | Australia     | Identify which barriers to discharge influence hospital occupancy when targeted by a hospital-wide policy                       | Quantitative  | Simulation modelling                                                                                   | NR                                                                      | NR                                                                |
| Rae et al. (2007) <sup>96</sup>       | New Zealand   | Illustrate how the Delayed Discharge Project solved a bed crisis and controlled expenditure                                     | Quantitative  | Continuous quality improvement project<br><br>Retrospective cohort data                                | Acute general medical                                                   | 20,034                                                            |
| Roberts et al. (2013) <sup>50</sup>   | Australia     | Undertake a preliminary trial of the Goal Length of Stay tool at a rehabilitation center                                        | Quantitative  | Prospective study                                                                                      | Inpatients in 2 units: stroke rehabilitation unit (SRU) or Brain Injury | 202                                                               |

| Author (Year)                               | Country        | Objective                                                                                                                                                             | Method       | Study Design                     | Participants                                                                  | Sample Size |
|---------------------------------------------|----------------|-----------------------------------------------------------------------------------------------------------------------------------------------------------------------|--------------|----------------------------------|-------------------------------------------------------------------------------|-------------|
|                                             |                |                                                                                                                                                                       |              |                                  | Rehabilitation Unit (BIRU)                                                    |             |
| Sampson et al. (2006) <sup>79</sup>         | United Kingdom | Describe bed occupancy data in people with diabetes before and after the introduction of a diabetes inpatient specialist nurse service                                | Quantitative | Retrospective study              | Diabetes inpatients                                                           | 152,080     |
| Shah (2007) <sup>97</sup>                   | England        | Examine the impact of the Community Care (Delayed Discharge) Act on bed occupancy and length of stay in Geriatric Medicine (GM) and Old Age Psychiatry (OAP) services | Quantitative | Retrospective                    | Inpatient - specialties of GM and OAP services                                | NR          |
| Sobotka et al. (2017) <sup>51</sup>         | United States  | Describe a hospital-to-home transitional care model                                                                                                                   | Case study   | Illustrative case design/ review | Pediatric inpatient                                                           | 1           |
| Starr-Hemburrow et al. (2011) <sup>80</sup> | Canada         | Minimize the number of post-acute patients transitioning from hospital to long-term care and develop an integrated plan for appropriate care and placement            | Quantitative | Quality improvement              | ALC patients                                                                  | NR          |
| Sutherland et al. (2013) <sup>45</sup>      | Canada         | Describe structural challenges to reduce the impact of ALC patients and to propose policy alternatives that could reduce occupancy                                    | NR           | Discussion and debate article    | ALC patients                                                                  | NR          |
| Taber et al. (2013) <sup>81</sup>           | United States  | Test a program to improve length of stay, delayed discharges and early readmissions for kidney transplant recipients                                                  | Quantitative | Observational study              | Adult kidney transplant recipients                                            | 476         |
| Udayai et al. (2012) <sup>82</sup>          | India          | Reduce patient discharge time through a Six Sigma project                                                                                                             | Quantitative | Time motion study                | Cash patients                                                                 | NR          |
| Williams et al. (2010) <sup>52</sup>        | Australia      | Examine the impact of a critical care outreach service on frequency of discharge delay from the intensive care unit                                                   | Quantitative | Prospective cohort study         | Patients discharged from the ICU                                              | 1,123       |
| Younis et al. (2011) <sup>53</sup>          | United Kingdom | Compare the effect of an enhanced recovery program with preoperative stoma education on the number of patients with prolonged hospital stay                           | Quantitative | Prospective study                | Patients undergoing anterior resection with the formation of a loop ileostomy | 120         |
| <b>Grey Literature</b>                      |                |                                                                                                                                                                       |              |                                  |                                                                               |             |
| Anonymous (2008) <sup>99</sup>              | United States  | Create an expedited discharge fund to pay for goods and services inhibiting a patient's discharge (medical equipment, medication and transportation)                  | N/A          | News Article                     | Uninsured patients                                                            | NR          |

| Author (Year)                                                     | Country        | Objective                                                                                                                                        | Method        | Study Design                                  | Participants                                     | Sample Size |
|-------------------------------------------------------------------|----------------|--------------------------------------------------------------------------------------------------------------------------------------------------|---------------|-----------------------------------------------|--------------------------------------------------|-------------|
| Anonymous (2010) <sup>46</sup>                                    | United States  | Improve patient flow through initiatives that decrease length of stay and increase capacity                                                      | N/A           | News Article                                  | NR                                               | NR          |
| Calveley (2007) <sup>83</sup>                                     | United Kingdom | Create a tier of support to reduce the unnecessary and costly occupation of hospital beds                                                        | N/A           | Review                                        | NR                                               | NR          |
| Manzano-Santaella (2009) <sup>100</sup>                           | United Kingdom | Analyse the relationship between Payment by Results and the Delayed Discharges Act                                                               | N/A           | Policy Analysis                               | NR                                               | NR          |
| Krystal (2019) <sup>86</sup>                                      | Canada         | NR                                                                                                                                               | Mixed methods | Continuous quality improvement and evaluation | Medically and socially complex and frail elderly | 100+        |
| Walker (2011) <sup>2</sup>                                        | Canada         | Develop recommendations of care for frail Canadians                                                                                              | N/A           | N/A                                           | NR                                               | NR          |
| North West Community Care Access Centre (2011) <sup>88</sup>      | Canada         | Create a fact sheet of the benefits of staying at home and using Wait at Home (enhanced home care services while people wait for long-term care) | N/A           | N/A                                           | Seniors waiting for LTC placement                | NR          |
| Toronto Central Community Care Access Centre (2015) <sup>67</sup> | Canada         | NR                                                                                                                                               | N/A           | N/A                                           | NR                                               | NR          |
| Province of New Brunswick (2017) <sup>92</sup>                    | Canada         | Identify priority strategic initiatives and implement community support orders across the province                                               | N/A           | Annual Report                                 | NR                                               | NR          |
| NHS Improvement (2018) <sup>104</sup>                             | United Kingdom | Create a how-to guide explaining implementation approaches to reduce length of stay                                                              | N/A           | Guide                                         | NR                                               | NR          |
| Starr-Hemburrow (2010) <sup>91</sup>                              | Canada         | Improve patient flow through the implementation of change management initiatives                                                                 | Quantitative  | Quality Improvement                           | NR                                               | NR          |

| Author (Year)                                         | Country        | Objective                                                                                                                                                                     | Method       | Study Design                                               | Participants                               | Sample Size |
|-------------------------------------------------------|----------------|-------------------------------------------------------------------------------------------------------------------------------------------------------------------------------|--------------|------------------------------------------------------------|--------------------------------------------|-------------|
| LHIN Collaborative (2011) <sup>87</sup>               | Canada         | Help support patients in their homes for as long as possible by providing them with community supports                                                                        | N/A          | Implementation Guide and Toolkit                           | Patients (specifically high needs seniors) | NR          |
| Shah (2011) <sup>90</sup>                             | Canada         | Ensure the appropriate community resources are in place to support the patient upon discharge                                                                                 | N/A          | Implementation Guide and Toolkit                           | High need seniors (75+)                    | NR          |
| Central East LHIN ALC Task Group (2008) <sup>84</sup> | Canada         | Understand the impact of delayed discharges in the Central East regions of Ontario (reviewing data, reading reports, initiating a pilot study, developing a patient flow map) | N/A          | Report                                                     | ALC patients                               | NR          |
| Adams, Care and Repair England (2017) <sup>98</sup>   | United Kingdom | Assist older patients in returning home from hospital quickly and safely                                                                                                      | Case Study   | Case Study                                                 | Older patients                             | 1           |
| Shah (2010) <sup>89</sup>                             | Canada         | Describe the Home First approach, a philosophy for reducing ALC                                                                                                               | Quantitative | Quality Improvement Initiative                             | Elderly patients                           | NR          |
| Joint Improvement Team (2013) <sup>85</sup>           | Scotland       | Identify 10 action items to transform discharge processes                                                                                                                     | N/A          | Quality Improvement/ Stakeholder Engagement (Expert Group) | N/A                                        | NR          |

848 Abbreviations: ALC = alternate level of care; ED = emergency department; SRU = stroke rehabilitation unit (SRU); BIRU = Brain Injury Rehabilitation Unit;  
 849 GM = geriatric medicine; OAP = Old Age Psychiatry

850 **Table 3. Initiative Characteristics**

| Author                                | Initiative Description/ Content                                                                                                                                                                                                                                                  | Target Population                                                         | Setting                                                      | Initiative Category <sup>1</sup>             | Results                                                                                                                   | Key conclusions                                                                                                                                                                                                              |
|---------------------------------------|----------------------------------------------------------------------------------------------------------------------------------------------------------------------------------------------------------------------------------------------------------------------------------|---------------------------------------------------------------------------|--------------------------------------------------------------|----------------------------------------------|---------------------------------------------------------------------------------------------------------------------------|------------------------------------------------------------------------------------------------------------------------------------------------------------------------------------------------------------------------------|
| <b>Database Searches</b>              |                                                                                                                                                                                                                                                                                  |                                                                           |                                                              |                                              |                                                                                                                           |                                                                                                                                                                                                                              |
| Adlington et al. (2018) <sup>40</sup> | Quality Improvement Program<br>• Weekly quality improvement meetings with driver diagrams to implement Plan Do Study Act cycles                                                                                                                                                  | Older adults (≥65) on psychiatric ward                                    | Hospital<br><br>Mile End Hospital (Leadenhall Ward), 26 beds | Information Sharing Live                     | • Length of stay was reduced from an average of 47 days to 30 days<br>• Bed occupancy was reduced from 77% to 54%         | • Daily rounds and management focusing on long-stay patients were effective in improving length of stay and bed occupancy<br>• Sustained improvements needed support from the quality improvement program and community team |
| Ardagh et al. (2011) <sup>63</sup>    | 10 Promising Initiatives<br>• Special beds, hospital operations planning, discharge planning, access to imaging, responsive acute secondary services, pathways for acute patients, acute demand mitigation, enhanced ED layout, enhanced ED senior staffing, engagement of staff | NR                                                                        | Hospitals                                                    | Tools and Guidelines<br><br>Practice Changes | • Identified top 10 challenges and 10 promising initiatives related to patient flow and emergency department overcrowding | • To improve patient flow and emergency department overcrowding the following are needed:<br>– a comprehensive, systematic approach<br>– changes to resource usage<br>– sharing of expertise and experience                  |
| Arendts et al. (2013) <sup>68</sup>   | Allied Health Assessment<br>• A comprehensive assessment of patients by an allied health team within hours of presentation to the hospital through the emergency department                                                                                                      | Patients (≥65) diagnosed with one or more of six predetermined conditions | Hospitals<br><br>Two Australian tertiary hospitals           | Practice Change                              | • No benefit in reducing hospital length of stay                                                                          | • Multidisciplinary allied health team assessment in the emergency department has no benefit in reducing hospital length of stay                                                                                             |

<sup>1</sup> Initiative category is based on Doern and Phidd's adapted framework 39. Hosseus D, Pal LA. Anatomy of a Policy Area: The Case of Shipping. *Canadian Public Policy / Analyse de Politiques* 1997;23(4):399-415. doi: 10.2307/3552071

| Author                              | Initiative Description/ Content                                                                                                                                                                                     | Target Population | Setting                                                          | Initiative Category <sup>1</sup>              | Results                                                                                                                                                                                                                                                                                                                                                                                                                                                                                                                                    | Key conclusions                                                                                                                                                                                                 |
|-------------------------------------|---------------------------------------------------------------------------------------------------------------------------------------------------------------------------------------------------------------------|-------------------|------------------------------------------------------------------|-----------------------------------------------|--------------------------------------------------------------------------------------------------------------------------------------------------------------------------------------------------------------------------------------------------------------------------------------------------------------------------------------------------------------------------------------------------------------------------------------------------------------------------------------------------------------------------------------------|-----------------------------------------------------------------------------------------------------------------------------------------------------------------------------------------------------------------|
| Baumann et al. (2007) <sup>55</sup> | N/A<br>• Qualitative study to identify factors associated with low rates of delayed discharges                                                                                                                      |                   | Hospitals (6 sites)<br><br>Four southern sites, 2 northern sites | Initiatives described touch on all categories | <ul style="list-style-type: none"> <li>• 6 high performing hospital sites identified issues impacting delayed discharges (capacity, internal hospital efficiencies and interagency efficiencies)</li> <li>• Resources and teams to prevent avoidable admissions</li> <li>• Discharge teams to support nurses' discharge planning,</li> <li>• Systems for monitoring and communicating patients' progress,</li> <li>• Patient choice protocols</li> <li>• Ensure availability of responsive transportation and discharge lounges</li> </ul> | <ul style="list-style-type: none"> <li>• Future research needs to explore the impact of the identified issues on patients, families and staff</li> </ul>                                                        |
| Behan (2005) <sup>93</sup>          | Community Care (Delayed Discharge) Act 2003<br>• Local authorities are financially responsible (payments) to acute hospital when patients remain in hospital because community care arrangements have not been made | NR                | 7 areas across the United Kingdom                                | Infrastructure and Money                      | <ul style="list-style-type: none"> <li>• National decrease in delayed discharges between 2003 and 2004</li> </ul>                                                                                                                                                                                                                                                                                                                                                                                                                          | <ul style="list-style-type: none"> <li>• Fines have resulted in a reduction of delayed discharges</li> <li>• The act has brought health and social care together</li> </ul>                                     |
| Béland et al. (2006) <sup>69</sup>  | Integrated Care<br>• Community-based multidisciplinary teams who provide integrated care and coordinate health and social service                                                                                   | Frail elderly     | Community service centres/ organizations                         | Practice Change                               | <ul style="list-style-type: none"> <li>• Significant (50%) reduction in the number of patients in the integrated care group that became ALC</li> <li>• No significant differences in utilization or costs between groups</li> </ul>                                                                                                                                                                                                                                                                                                        | <ul style="list-style-type: none"> <li>• Changing delivery of care for frail elderly persons is feasible</li> <li>• Integrated care can reduce hospital and nursing home use, without impacting cost</li> </ul> |



| Author                               | Initiative Description/ Content                                                                                                                                                                                                                  | Target Population                                                                             | Setting                                                                     | Initiative Category <sup>1</sup> | Results                                                                                                                                                                                                                      | Key conclusions                                                                                                                                                                                                                   |
|--------------------------------------|--------------------------------------------------------------------------------------------------------------------------------------------------------------------------------------------------------------------------------------------------|-----------------------------------------------------------------------------------------------|-----------------------------------------------------------------------------|----------------------------------|------------------------------------------------------------------------------------------------------------------------------------------------------------------------------------------------------------------------------|-----------------------------------------------------------------------------------------------------------------------------------------------------------------------------------------------------------------------------------|
|                                      |                                                                                                                                                                                                                                                  |                                                                                               |                                                                             |                                  | <ul style="list-style-type: none"> <li>Increased caregiver satisfaction</li> </ul>                                                                                                                                           |                                                                                                                                                                                                                                   |
| Blecker et al. (2015) <sup>70</sup>  | 7-Day Hospital Initiative <ul style="list-style-type: none"> <li>Increased hospital services on the weekend (e.g. diagnostic imaging, weekend discharges, physician and care management services)</li> </ul>                                     | Non-obstetric hospitalized patients                                                           | Hospital<br><br>Tisch Hospital, 705 beds                                    | Practice Change                  | <ul style="list-style-type: none"> <li>Decreased average length of stay by 13%</li> <li>Increased proportion of weekend discharges by 12%</li> <li>Decreased 30-day readmissions</li> <li>No changes in mortality</li> </ul> | <ul style="list-style-type: none"> <li>Increased care on weekends may contribute to improved hospital flow, without negatively impacting clinical outcomes (30-day readmissions and mortality)</li> </ul>                         |
| Boutette et al. (2018) <sup>71</sup> | Subacute Care Unit for Frail Elderly <ul style="list-style-type: none"> <li>Subacute care in a restorative environment (integrated care and restoration)</li> </ul>                                                                              | Frail older patients who are at risk of deconditioning associated with a long hospitalization | Hospitals<br><br>Ottawa Hospital; Perley and Rideau Veterans' Health Centre | Practice Change                  | <ul style="list-style-type: none"> <li>N/A</li> </ul>                                                                                                                                                                        | <ul style="list-style-type: none"> <li>Key features of the model: proactive, restorative, collaborative and integrated, client-centred and cost-effective</li> </ul>                                                              |
| Bowen et al. (2014) <sup>72</sup>    | Nurse led discharge <ul style="list-style-type: none"> <li>Allows nurses to facilitate discharge based on specific criteria that was developed to guide the discharge process (also allows for discharge in evenings and on weekends)</li> </ul> | Adult ear, nose, throat patients having routine, elective, short-stay surgery                 | Hospital<br><br>University Hospital of South Manchester                     | Practice Change                  | <ul style="list-style-type: none"> <li>Significant reduction in rate of delayed discharges in both audits</li> </ul>                                                                                                         | <ul style="list-style-type: none"> <li>Improved efficiency around discharge of elective short-stay ear, nose, throat patients</li> <li>95% of ear, nose, throat patients (for simple discharge) are discharged on time</li> </ul> |
| Boyd (2017) <sup>41</sup>            | Communication and Leadership <ul style="list-style-type: none"> <li>Efficient communication and leadership from hospital administrators</li> </ul>                                                                                               | NR                                                                                            | Hospitals (2)<br><br>Part of a hospital conglomerate in Chicago             | Information Sharing Live         | <ul style="list-style-type: none"> <li>Strategies for improving delayed discharges and reducing financial burden included efficient communication and effective leadership</li> </ul>                                        | <ul style="list-style-type: none"> <li>Effective leadership from hospital administrators contributes to positive outcomes for patients, staff and the economy</li> </ul>                                                          |
| Brankline (2009) <sup>47</sup>       | Technology-Assisted Referrals <ul style="list-style-type: none"> <li>The use of technology to improve information</li> </ul>                                                                                                                     | Elderly patients who require nursing home                                                     | Academic Medical Center                                                     | Information Sharing Live         | <ul style="list-style-type: none"> <li>Decreased length of stay and improved timely discharges of patients resulted in cost savings</li> </ul>                                                                               | <ul style="list-style-type: none"> <li>Improved information exchange between hospitals and nursing homes</li> </ul>                                                                                                               |

| Author                               | Initiative Description/ Content                                                                                                                                                                                 | Target Population                                                                                   | Setting                                                                                                       | Initiative Category <sup>1</sup>            | Results                                                                                                                                                                                                                                                                                                      | Key conclusions                                                                                                                                                                                                                              |
|--------------------------------------|-----------------------------------------------------------------------------------------------------------------------------------------------------------------------------------------------------------------|-----------------------------------------------------------------------------------------------------|---------------------------------------------------------------------------------------------------------------|---------------------------------------------|--------------------------------------------------------------------------------------------------------------------------------------------------------------------------------------------------------------------------------------------------------------------------------------------------------------|----------------------------------------------------------------------------------------------------------------------------------------------------------------------------------------------------------------------------------------------|
|                                      | exchange and processes, increase data accuracy and produce documents                                                                                                                                            | placement after hospital discharge                                                                  |                                                                                                               | Tools and Guidelines                        | <ul style="list-style-type: none"> <li>Increased communication within and between the hospital and nursing homes</li> </ul>                                                                                                                                                                                  |                                                                                                                                                                                                                                              |
| Brown et al. (2008) <sup>64</sup>    | Discharge Criteria <ul style="list-style-type: none"> <li>Nurse implementation of predetermined discharge criteria (activity, respirations, pulse, blood pressure, pain, etc.)</li> </ul>                       | Adult, ASA physical status I, II, and III patients, 18 years or older, requiring general anesthesia | Hospital<br><br>Postoperative recovery area of a large, tertiary-care, academic hospital                      | Tools and Guidelines<br><br>Practice Change | <ul style="list-style-type: none"> <li>Decreased length of stay in the post-anesthesia care unit by 24%</li> <li>Reduced discharge delays with nurse-led discharge</li> <li>No change in adverse events (airway obstruction, reintubation, arrest)</li> </ul>                                                | <ul style="list-style-type: none"> <li>Decreased post-anesthesia care unit length of stay and discharge delays while maintaining patient status</li> </ul>                                                                                   |
| Burr et al. (2017) <sup>56</sup>     | ALC Avoidance Framework <ul style="list-style-type: none"> <li>A framework of strategies to reduce ALC numbers and promote ALC avoidance</li> </ul>                                                             | ALC patients                                                                                        | Hospitals (3)<br><br>(1) Michael Garron Hospital<br>(2) Humber River Hospital<br>(3) Toronto General Hospital | Tools and Guidelines                        | <ul style="list-style-type: none"> <li>(1) MGH – exceeded ALC target by 20%, reduced number of ALC patients waiting for long-term care</li> <li>(2) HRH – culture shift after implementation of ALC framework recommendations</li> <li>(3) TGH – improved number of ALC admission avoidance cases</li> </ul> | <ul style="list-style-type: none"> <li>ALC avoidance reduces burden on patients, families and providers</li> <li>Long-term solutions to improve patient flow and avoid ALC should be sustainable and align with other initiatives</li> </ul> |
| Caminiti et al. (2013) <sup>42</sup> | Physician Accountability <ul style="list-style-type: none"> <li>Physician motivation and accountability through monthly reports and audits (can compare their length of stay results to other staff)</li> </ul> | Hospital Units: geriatric, medicine, long-term care                                                 | Hospital<br><br>University Hospital of Parma, 1267 beds                                                       | Information Sharing Live                    | <ul style="list-style-type: none"> <li>Reduction in unnecessary, avoidable hospital days</li> <li>No significant changes in 30-day readmission or mortality</li> </ul>                                                                                                                                       | <ul style="list-style-type: none"> <li>Physician direct accountability can reduce unnecessary and avoidable hospital days, especially when delays are within staff control</li> </ul>                                                        |
| Chidwick et al. (2017) <sup>54</sup> | Change Ideas <ul style="list-style-type: none"> <li>Identification of change concepts, followed by the development and implementation of change ideas to promote behaviour change</li> </ul>                    | ALC patients                                                                                        | Hospital<br><br>William Osler Health System                                                                   | Practice Change<br><br>Tools, guidelines    | <ul style="list-style-type: none"> <li>Lowest ALC days in Ontario</li> <li>Eliminated ethical errors, improved patient discharge experience and decreased patient confusion</li> </ul>                                                                                                                       | <ul style="list-style-type: none"> <li>Improved patient flow and reduced ALC days through the implementation of a multi-dimensional approach</li> </ul>                                                                                      |

| Author                               | Initiative Description/ Content                                                                                                                                                                                                  | Target Population                                                                       | Setting                                                                                                  | Initiative Category <sup>1</sup>         | Results                                                                                                                                                                                                                                                   | Key conclusions                                                                                                                                                                                                                                                         |
|--------------------------------------|----------------------------------------------------------------------------------------------------------------------------------------------------------------------------------------------------------------------------------|-----------------------------------------------------------------------------------------|----------------------------------------------------------------------------------------------------------|------------------------------------------|-----------------------------------------------------------------------------------------------------------------------------------------------------------------------------------------------------------------------------------------------------------|-------------------------------------------------------------------------------------------------------------------------------------------------------------------------------------------------------------------------------------------------------------------------|
|                                      |                                                                                                                                                                                                                                  |                                                                                         |                                                                                                          | Information sharing Live                 |                                                                                                                                                                                                                                                           |                                                                                                                                                                                                                                                                         |
| El-Eid et al. (2015) <sup>73</sup>   | Hospital Throughput Project using Six Sigma Methodology <ul style="list-style-type: none"> <li>The use of Six Sigma Methodology to implement electronic patient requests, a floor clerk and a billing officer</li> </ul>         | NR                                                                                      | Hospital (tertiary care teaching hospital)<br><br>American University of Beirut Medical Center, 386 beds | Practice Change                          | <ul style="list-style-type: none"> <li>Significant reduction in length of stay post-intervention</li> <li>Decreased discharge time (2.2 hours to 1.7 hours)</li> </ul>                                                                                    | <ul style="list-style-type: none"> <li>Six Sigma can have a positive and sustainable impact on patient flow and length of stay</li> <li>Discharge delays should be addressed through principles of Six Sigma, rather than institution-specific interventions</li> </ul> |
| Gaughan et al. (2015) <sup>101</sup> | Increasing supply of nursing home beds <ul style="list-style-type: none"> <li>The use of modeling to explore the effect of increased supply of nursing home beds or lower prices of nursing home beds on bed blocking</li> </ul> | Patients waiting for hospital discharge                                                 | Hospital                                                                                                 | Other Initiative                         | <ul style="list-style-type: none"> <li>Increasing home care beds by 10% would decrease social care delayed discharges by 6-9%</li> </ul>                                                                                                                  | <ul style="list-style-type: none"> <li>Improved coordination between health and long-term care is essential for addressing delayed discharges</li> </ul>                                                                                                                |
| Graham et al. (2012) <sup>74</sup>   | Nurse-led Discharge <ul style="list-style-type: none"> <li>Nurse led discharge following list of criteria (that each patient must meet)</li> </ul>                                                                               | Patients receiving laparoscopic cholecystectomy and laparoscopic inguinal hernia repair | Hospital<br><br>Leicester Royal Infirmary                                                                | Practice Change                          | <ul style="list-style-type: none"> <li>Nurse-led discharge group were significantly more likely to be discharged on the day of surgery</li> <li>No significant difference in readmission rates or patients seeking primary care post-discharge</li> </ul> | <ul style="list-style-type: none"> <li>Nurse-led discharge may increase discharge post-laparoscopic surgery without impacting patient care</li> </ul>                                                                                                                   |
| Gutmanis et al. (2016) <sup>65</sup> | Behavioural Supports Ontario <ul style="list-style-type: none"> <li>A quality improvement initiative for older adults with responsive behaviours through the identification of change strategies and</li> </ul>                  | Individuals with responsive behaviours                                                  | South West LHIN                                                                                          | Practice Change<br><br>Tools, guidelines | <ul style="list-style-type: none"> <li>Decreased ALC care cases among persons with behavioural needs</li> <li>Improved perceptions from families and clients around patient care</li> </ul>                                                               | <ul style="list-style-type: none"> <li>Improved coordination and communication across sectors</li> <li>Provided healthcare providers with learning opportunities</li> </ul>                                                                                             |

| Author                                   | Initiative Description/ Content                                                                                                                                                                                                                 | Target Population                                          | Setting                                                 | Initiative Category <sup>1</sup>                     | Results                                                                                                                                                                                                  | Key conclusions                                                                                                                                 |
|------------------------------------------|-------------------------------------------------------------------------------------------------------------------------------------------------------------------------------------------------------------------------------------------------|------------------------------------------------------------|---------------------------------------------------------|------------------------------------------------------|----------------------------------------------------------------------------------------------------------------------------------------------------------------------------------------------------------|-------------------------------------------------------------------------------------------------------------------------------------------------|
|                                          | knowledge translation best practices                                                                                                                                                                                                            |                                                            |                                                         |                                                      |                                                                                                                                                                                                          |                                                                                                                                                 |
| Henwood (2006) <sup>48</sup>             | Change Agent Team<br>• A team partnership between health and social care to explore the issues around delayed discharges                                                                                                                        | Inpatients                                                 |                                                         | Information sharing Live<br><br>Tools and guidelines | • The Change Agent Team helped support implementation of contingency arrangements at the local level                                                                                                     | • Addressing and improving delayed discharges requires partnerships between health and social care and a whole systems-based approach           |
| Holland et al. (2016) <sup>57</sup>      | Tracking and reporting system<br>• Development and evaluation of a discharge delay tracking and reporting mechanism                                                                                                                             | Inpatients                                                 | Hospital (academic medical center)                      | Tools and Guidelines                                 | • Individual patient discharges may be improved by tracking factors that cause delays<br>• Nurses took the time to provide comments regarding patient delays                                             | • Discharge delays can be reduced if system and process breakdowns are identified and addressed                                                 |
| Katsaliaki et al. (2005) <sup>102</sup>  | Intermediate Care Services<br>• Statistical simulations to investigate potential care pathways and associated costs                                                                                                                             | Inpatients                                                 | Hampshire Social Services                               | Other Initiative                                     | • 500 new places will help to balance the demand and capacity for Intermediate Care Services by avoiding a deterioration of delay times                                                                  | • Simulation is a suitable methodology for recording and evaluating the new post-acute packages                                                 |
| Lees-Deutsch et al. (2019) <sup>66</sup> | Criteria Led Discharge - Selection of Patients for Efficient and Effective Discharge (SPEED)<br>• Patient discharge is guided by a set of clinical criteria; once the patient meets the criteria, a member of the team can facilitate discharge | Patients discharged from the AMU and both short-stay wards | Hospital (acute medicine service with 4 clinical areas) | Tools and Guidelines<br><br>Practice Change          | • 27 patients were suitable for CLD, 23 were not<br>• Mean wait time for the 27 suitable patients prior to discharge was 4 hours and 51 minutes<br>• Discharge delays were often caused by system delays | • Criteria led discharge may be suitable for select patients in improving timeliness of discharge                                               |
| Levin et al. (2019) <sup>94</sup>        | Step-up Intermediate Care Units<br>• A bridging service between hospital and home for individuals ready for discharge from acute care;                                                                                                          | Aged 75+                                                   | Hospital                                                | Infrastructure and Money                             | • Reduced bed days delayed<br>• Rate of days delayed increased over time                                                                                                                                 | • Immediate impact on days delayed, but increasing rates days delayed over time suggests that Intermediate Care services may need to be adapted |

| Author                              | Initiative Description/ Content                                                                                                                                                                                                       | Target Population                                 | Setting                                      | Initiative Category <sup>1</sup> | Results                                                                                                                                                                                                                                                                                     | Key conclusions                                                                                                                                                                                      |
|-------------------------------------|---------------------------------------------------------------------------------------------------------------------------------------------------------------------------------------------------------------------------------------|---------------------------------------------------|----------------------------------------------|----------------------------------|---------------------------------------------------------------------------------------------------------------------------------------------------------------------------------------------------------------------------------------------------------------------------------------------|------------------------------------------------------------------------------------------------------------------------------------------------------------------------------------------------------|
|                                     | allows for recovery and regaining of independence                                                                                                                                                                                     |                                                   |                                              |                                  |                                                                                                                                                                                                                                                                                             |                                                                                                                                                                                                      |
| Lian et al. (2008) <sup>58</sup>    | New Discharge Guidelines for Premature Babies<br><ul style="list-style-type: none"> <li>• Development of new discharge guidelines for premature neonates</li> </ul>                                                                   | Premature infants                                 | Hospital<br><br>Singapore General Hospital   | Tools and Guidelines             | <ul style="list-style-type: none"> <li>• Reduced median duration of hospitalization from 58.2 days to 34.9 days</li> <li>• Cost savings of \$6174/ infant</li> </ul>                                                                                                                        | <ul style="list-style-type: none"> <li>• Discharge planning should begin upon hospital admission</li> <li>• Nurses should coach parents to prepare them to care for their infant at home</li> </ul>  |
| Maessen et al. (2008) <sup>75</sup> | Enhanced Recovery After Surgery (ERAS)<br><ul style="list-style-type: none"> <li>• Reduction in the postoperative recovery period to reduce overall hospital length of stay</li> </ul>                                                | Patients undergoing elective colorectal resection | Hospital                                     | Practice Change                  | <ul style="list-style-type: none"> <li>• No significant difference in proportion of patients with a discharge delay post-ERAS program</li> <li>• Approximately 90% of patients pre and post-ERAS were not discharged on the day discharge criteria/ functional recovery were met</li> </ul> | <ul style="list-style-type: none"> <li>• Additional recovery statistics should be added as outcomes of the ERAS program</li> </ul>                                                                   |
| Mahant et al. (2008) <sup>59</sup>  | Medical Care Appropriateness Protocol (MCAP) - Audit and Feedback<br><ul style="list-style-type: none"> <li>• A tool that provides information on hospital bed use (qualified and nonqualified hospital days)</li> </ul>              | Pediatric inpatients                              | Hospital<br><br>Hospital for Sick Children   | Tools and Guidelines             | <ul style="list-style-type: none"> <li>• Significantly lower risk of inappropriate hospital days</li> <li>• During the intervention, 33% of bed days were nonqualified, compared to 47% pre-intervention</li> <li>• No change in 48-hour readmission rate</li> </ul>                        | <ul style="list-style-type: none"> <li>• Reduced inappropriate hospital days, without impacting readmission rates</li> <li>• Identified processes that impact inappropriate hospital days</li> </ul> |
| Mahto et al. (2009) <sup>76</sup>   | Hospital Diabetes Outreach Service<br><ul style="list-style-type: none"> <li>• A service to prevent admission through a number of strategies (improved access to services, management of medical problems, early discharge</li> </ul> | Acutely admitted patients with diabetes           | Hospital<br><br>New Cross Hospital, 700 beds | Practice Change                  | <ul style="list-style-type: none"> <li>• Reduction in bed occupancy, inappropriate admissions, delayed discharges and effective discharge planning</li> </ul>                                                                                                                               | <ul style="list-style-type: none"> <li>• The restructured hospital diabetes outreach service improved outcomes for inpatients with diabetes</li> </ul>                                               |

| Author                               | Initiative Description/ Content                                                                                                                                                                                | Target Population                          | Setting                                                             | Initiative Category <sup>1</sup>                     | Results                                                                                                                                                                                                                                                                                                                                                       | Key conclusions                                                                                                                                                                                                                                                                                                                      |
|--------------------------------------|----------------------------------------------------------------------------------------------------------------------------------------------------------------------------------------------------------------|--------------------------------------------|---------------------------------------------------------------------|------------------------------------------------------|---------------------------------------------------------------------------------------------------------------------------------------------------------------------------------------------------------------------------------------------------------------------------------------------------------------------------------------------------------------|--------------------------------------------------------------------------------------------------------------------------------------------------------------------------------------------------------------------------------------------------------------------------------------------------------------------------------------|
|                                      | planning, organization of follow-up care)                                                                                                                                                                      |                                            |                                                                     |                                                      |                                                                                                                                                                                                                                                                                                                                                               |                                                                                                                                                                                                                                                                                                                                      |
| Maloney et al. (2007) <sup>49</sup>  | Patient Tracker <ul style="list-style-type: none"> <li>• A web-based application to facilitate the discharge process by enhancing communication between disciplines</li> </ul>                                 | Inpatients                                 | Hospital<br><br>Primary Children's Medical Center                   | Tools and Guidelines<br><br>Information Sharing Live | <ul style="list-style-type: none"> <li>• Decreased number of cancelled surgeries, median emergency department length of stay and average number of inpatient admissions</li> </ul>                                                                                                                                                                            | <ul style="list-style-type: none"> <li>• Healthcare information technology can facilitate bed management efficiencies</li> <li>• Improved coordination and overall inpatient flow</li> </ul>                                                                                                                                         |
| Manville et al. (2014) <sup>95</sup> | Transitional Care Unit <ul style="list-style-type: none"> <li>• A rehabilitation-style unit with enhanced nursing and rehabilitation services for elderly patients</li> </ul>                                  | Elderly ALC patients (70+)                 | Hospital<br><br>St Joseph's Hospital, 22-bed transitional care unit | Infrastructure and Money                             | <ul style="list-style-type: none"> <li>• Improved health outcomes and discharge disposition, decreased length of stay and costs per patient</li> </ul>                                                                                                                                                                                                        | <ul style="list-style-type: none"> <li>• Improved health functional outcomes, delivered at a lower cost</li> </ul>                                                                                                                                                                                                                   |
| Meehan et al. (2018) <sup>77</sup>   | Discharge to Assess (D2A) <ul style="list-style-type: none"> <li>• Patients who require care support are discharged home, or to the community, for a needs assessment in their personal environment</li> </ul> | Patients discharged through D2A            | Hospital                                                            | Practice Change                                      | <ul style="list-style-type: none"> <li>• Assists with early and effective hospital discharge</li> <li>• 60% of patients and caregivers reported a positive experience with D2A</li> <li>• Communication was noted as an issue</li> </ul>                                                                                                                      | <ul style="list-style-type: none"> <li>• Patients and caregivers reported positive and negative experiences with D2A, but it may be beneficial in improving outcomes for some patients</li> </ul>                                                                                                                                    |
| Moeller et al. (2006) <sup>60</sup>  | Critical Pathway <ul style="list-style-type: none"> <li>• Criteria for the management and discharge of patients admitted with community-acquired pneumonia</li> </ul>                                          | Patients with community-acquired pneumonia | Hospital<br><br>Queen Elizabeth II Health Sciences Centre, 637 beds | Tools and Guidelines                                 | <ul style="list-style-type: none"> <li>• 58% of patients with a prolonged length of stay felt they were ready to go home once reaching clinical stability, compared to 92% of patients without a prolonged length of stay</li> <li>• Hierarchical Assessment of Balance and Mobility score at clinical stability was significantly associated with</li> </ul> | <ul style="list-style-type: none"> <li>• Patients outcomes can be improved by standardizing care through a critical pathway</li> <li>• Patients with poor functional capacity (using the Hierarchical Assessment of Balance and Mobility) may need additional services to improve discharge time after clinical stability</li> </ul> |

| Author                                 | Initiative Description/ Content                                                                                                                                                                                                                                    | Target Population                            | Setting                                                         | Initiative Category <sup>1</sup> | Results                                                                                                                                                                                                                             | Key conclusions                                                                                                                                                                                                                           |
|----------------------------------------|--------------------------------------------------------------------------------------------------------------------------------------------------------------------------------------------------------------------------------------------------------------------|----------------------------------------------|-----------------------------------------------------------------|----------------------------------|-------------------------------------------------------------------------------------------------------------------------------------------------------------------------------------------------------------------------------------|-------------------------------------------------------------------------------------------------------------------------------------------------------------------------------------------------------------------------------------------|
|                                        |                                                                                                                                                                                                                                                                    |                                              |                                                                 |                                  | physicians' and families' assessment of the patients' discharge readiness                                                                                                                                                           |                                                                                                                                                                                                                                           |
| Mur-Veeman et al. (2011) <sup>61</sup> | <p>Buffer Management</p> <ul style="list-style-type: none"> <li>• A tool that aims to balance patient flow between hospital and nursing homes by maximizing patient throughput</li> </ul>                                                                          | Bed blockers                                 | Hospital to nursing home (intermediate care department)         | Tools and Guidelines             | <ul style="list-style-type: none"> <li>• The lack of cooperation is an inhibitor of buffer management</li> <li>• Efforts should focus on improving cooperation between providers</li> </ul>                                         | <ul style="list-style-type: none"> <li>• To practically apply buffer management, current routines, principles and beliefs should shift to focus on flow between organizations rather than within one organization</li> </ul>              |
| Niemeijer et al. (2010) <sup>62</sup>  | <p>Lean Six Sigma</p> <ul style="list-style-type: none"> <li>• An initiative based on Lean Six Sigma to reduce length of stay, improve discharge procedures, create admission capacity and reduce costs</li> </ul>                                                 | Trauma patients                              | Hospital<br>University Medical Center Groningen, 1339 beds      | Tools and Guidelines             | <ul style="list-style-type: none"> <li>• Average length of stay of all patients (surgical and trauma) decreased by 2.9 days post-intervention</li> <li>• Average length of stay of trauma patients decreased by 3.3 days</li> </ul> | <ul style="list-style-type: none"> <li>• Lean Six Sigma is effective in reducing length of stay and improving financial efficiency in trauma care</li> </ul>                                                                              |
| Panis et al. (2004) <sup>78</sup>      | <p>Dutch Evaluation Protocol</p> <ul style="list-style-type: none"> <li>• Altering discharge procedures to assess inappropriate hospital stay, efficiency and patient logistics</li> </ul>                                                                         | Mothers of newborn patients                  | Hospital<br>Maternity unit of 17 beds (715 total hospital beds) | Practice Change                  | <ul style="list-style-type: none"> <li>• Reduction in inappropriate patient stay by 6.1%</li> <li>• Decrease in length of stay by 0.7 days</li> </ul>                                                                               | <ul style="list-style-type: none"> <li>• Discharge criteria can reduce inappropriate patient stays related to discharge processes</li> <li>• Shifting maternity care to outpatient settings can reduce hospital length of stay</li> </ul> |
| Patel et al. (2019) <sup>43</sup>      | <p>Multidisciplinary Team-Based Structure for Discharge Rounds</p> <ul style="list-style-type: none"> <li>• Interventions based around multidisciplinary team-based discharge planning rounds (afternoon huddles, pilot teams for physician continuity)</li> </ul> | Dissatisfied patients with delayed discharge | Hospital<br>University of Colorado Hospital, 673 beds           | Information Sharing Live         | <ul style="list-style-type: none"> <li>• Higher proportion of patients discharged before noon, lower length of stay and 30-day readmission rate in pilot team compared to control</li> </ul>                                        | <ul style="list-style-type: none"> <li>• Multidisciplinary discharge rounds can improve discharge efficiency, length of stay and 30-day readmissions</li> </ul>                                                                           |

| Author                              | Initiative Description/ Content                                                                                                                                                                                                                  | Target Population                                                                                  | Setting                                               | Initiative Category <sup>1</sup>                 | Results                                                                                                                                                                                                                                                                               | Key conclusions                                                                                                                                                                                                                                                                                                            |
|-------------------------------------|--------------------------------------------------------------------------------------------------------------------------------------------------------------------------------------------------------------------------------------------------|----------------------------------------------------------------------------------------------------|-------------------------------------------------------|--------------------------------------------------|---------------------------------------------------------------------------------------------------------------------------------------------------------------------------------------------------------------------------------------------------------------------------------------|----------------------------------------------------------------------------------------------------------------------------------------------------------------------------------------------------------------------------------------------------------------------------------------------------------------------------|
| Pirani (2010) <sup>44</sup>         | Nurse Participation and Patient and Family Involvement <ul style="list-style-type: none"> <li>• Communication between the nurse and patient/ family to promote continuity of care and coordination of services</li> </ul>                        | Those experiencing delayed discharge                                                               | NR                                                    | Information Sharing Live                         | <ul style="list-style-type: none"> <li>• Enhancing nurse involvement in the discharge planning process can improve delayed discharges</li> </ul>                                                                                                                                      | <ul style="list-style-type: none"> <li>• Nurses play a key role in delivering patient-centred care and can improve discharge planning processes</li> <li>• Nurses must have the appropriate knowledge about discharge planning and have the ability to communicate, coordinate and educate patients</li> </ul>             |
| Qin et al. (2017) <sup>103</sup>    | Simulation Modelling <ul style="list-style-type: none"> <li>• Statistical simulations to explore patient flow and different discharge strategies that could reduce hospital occupancy</li> </ul>                                                 | Varies based on model                                                                              | Hospital<br>Flinders Medical Centre (FMC)             | Other initiative                                 | <ul style="list-style-type: none"> <li>• Hospital occupancy can be significantly reduced, with a reduction from 281.5 to 22.8 days in the best scenario (instantaneous discharge for 24 hours)</li> </ul>                                                                             | <ul style="list-style-type: none"> <li>• Hospital occupancy rates and overcrowding can be improved by improving discharge processes</li> </ul>                                                                                                                                                                             |
| Rae et al. (2007) <sup>96</sup>     | Delayed Discharge Project <ul style="list-style-type: none"> <li>• Local authorities are financially responsible (payments) to acute hospital when patients remain in hospital because community care arrangements have not been made</li> </ul> | Acute general medical patients                                                                     | Hospital<br>Dunedin hospital                          | Infrastructure and Money                         | <ul style="list-style-type: none"> <li>• Mean length of stay decreased by 2.6 days (from 6.5 to 3.9 days)</li> <li>• Decreased costs of service delivery by \$2.4 million</li> <li>• Bed numbers decreased by 24 (from 56 to 32)</li> <li>• No change in readmission rates</li> </ul> | <ul style="list-style-type: none"> <li>• The project altered staff behaviour around patient discharge resulting in a better use of resources</li> <li>• The system crashed 2 years post-implementation</li> <li>• There is too much focus on length of stay and bed allocations leading to poor decision making</li> </ul> |
| Roberts et al. (2013) <sup>50</sup> | Royal Rehabilitation Centre, Sydney, Goal Length of Stay tool <ul style="list-style-type: none"> <li>• A tool that reports the length of stay benchmark figures on an individual patient basis</li> </ul>                                        | Inpatients in 2 units: SRU (stroke rehabilitation unit) or BIRU (Brain Injury Rehabilitation Unit) | Hospital<br>Hampstead Rehabilitation Centre, 128 beds | Tools and Guidelines<br>Information Sharing Live | <ul style="list-style-type: none"> <li>• Total discharge delays from the 2 units totaled 6311 days</li> <li>• Length of stay was not decreased</li> <li>• Negative perceptions of the program from staff</li> </ul>                                                                   | <ul style="list-style-type: none"> <li>• The program did not reduce length of stay and was perceived negatively by staff</li> </ul>                                                                                                                                                                                        |



| Author                                      | Initiative Description/ Content                                                                                                                                                                                     | Target Population                                                                        | Setting                                                                     | Initiative Category <sup>1</sup>                | Results                                                                                                                                                                                                                                                                                                                                  | Key conclusions                                                                                                           |
|---------------------------------------------|---------------------------------------------------------------------------------------------------------------------------------------------------------------------------------------------------------------------|------------------------------------------------------------------------------------------|-----------------------------------------------------------------------------|-------------------------------------------------|------------------------------------------------------------------------------------------------------------------------------------------------------------------------------------------------------------------------------------------------------------------------------------------------------------------------------------------|---------------------------------------------------------------------------------------------------------------------------|
| Sampson et al. (2006) <sup>79</sup>         | Diabetes inpatient specialist nurse (DISN)<br>• Diabetes management, based on structured group education, for all diabetes inpatients                                                                               | Diabetes inpatients                                                                      | Hospital<br><br>Norfolk and Norwich University Hospital NHS Trust, 989 beds | Practice Change                                 | • Decreased mean excess bed days by 0.7 days (from 1.9 to 1.2)                                                                                                                                                                                                                                                                           | • Diabetes inpatient specialist nurse reduced excess bed occupancy                                                        |
| Shah (2007) <sup>97</sup>                   | Community Care (Delayed Discharge) Act 2003<br>• Local authorities are financially responsible (payments) to acute hospital when patients remain in hospital because community care arrangements have not been made | Inpatient - specialties of Geriatric Medicine (GM) and Old Age Psychiatry (OAP) services | Hospitals                                                                   | Infrastructure and Money                        | <u>GM:</u><br>• Decreased median and mean length of stay<br>• Increased number of finished episodes (inpatient discharges)<br>• No relationship with number of bed days<br><u>OAP:</u><br>• Increased median and mean length of stay<br>• Decreased number of finished episodes (inpatient discharges)<br>• Increased number of bed days | • More patients were admitted to GM services and had a shorter length of stay than OAP                                    |
| Sobotka et al. (2017) <sup>51</sup>         | The Hospital-to-Home Transitional Care Program at AHK (Almost Home Kids)<br>• A program to support and educate families on providing care for medically stable children at home                                     | Pediatric inpatient                                                                      | Transitional and Respite Centre<br><br>Almost Home Kids                     | Practice Change<br><br>Information Sharing Live | • 2 months following support at AHK, the patient transitioned home to be cared for by his mother and home care team                                                                                                                                                                                                                      | • Transitional care programs can improve care for vulnerable populations by reducing health and developmental differences |
| Starr-Hemburrow et al. (2011) <sup>80</sup> | Home First<br>• A program designed to help keep patients in their homes (with community supports) for as long as possible;                                                                                          | ALC patients                                                                             | Hospitals                                                                   | Practice Change                                 | • Rate of ALC patients decreased by at least 50% across the region of study                                                                                                                                                                                                                                                              | • Inter and intra-professional collaboration is important to standardize discharge processes, build trust and respect and |

| Author                                 | Initiative Description/ Content                                                                                                                                                                                                                                                                 | Target Population                  | Setting                                                           | Initiative Category <sup>1</sup>                | Results                                                                                                                                                                                               | Key conclusions                                                                                                                                                                                                                                        |
|----------------------------------------|-------------------------------------------------------------------------------------------------------------------------------------------------------------------------------------------------------------------------------------------------------------------------------------------------|------------------------------------|-------------------------------------------------------------------|-------------------------------------------------|-------------------------------------------------------------------------------------------------------------------------------------------------------------------------------------------------------|--------------------------------------------------------------------------------------------------------------------------------------------------------------------------------------------------------------------------------------------------------|
|                                        | focusing on providing access to needed services                                                                                                                                                                                                                                                 |                                    |                                                                   |                                                 |                                                                                                                                                                                                       | improve coordination of care                                                                                                                                                                                                                           |
| Sutherland et al. (2013) <sup>45</sup> | Build More; Integrated Care; and Financial Incentives<br><ul style="list-style-type: none"> <li>• Three strategies to improve ALC impact on hospitals (build more beds, integrated care, financial incentives for post-acute providers)</li> </ul>                                              | ALC patients                       | Hospitals                                                         | Information Sharing Recommendation Document     | • N/A                                                                                                                                                                                                 | <ul style="list-style-type: none"> <li>• A collaborative approach combining the three strategies should be considered to address ALC</li> </ul>                                                                                                        |
| Taber et al. (2013) <sup>81</sup>      | Comprehensive Interdisciplinary Improvement Initiative<br><ul style="list-style-type: none"> <li>• A program implemented by a multidisciplinary team to improve length of stay, delayed discharges and early readmissions through key initiatives</li> </ul>                                    | Adult kidney transplant recipients | Hospital<br><br>Medical University of South Carolina              | Practice Change                                 | <ul style="list-style-type: none"> <li>• Delayed discharges decreased by 14%</li> <li>• Readmission rate (7-day) decreased by 50%</li> <li>• Acute rejection and infection rates decreased</li> </ul> | <ul style="list-style-type: none"> <li>• Improving medication safety post kidney transplant can improve clinical outcomes (acute rejection and infection rates, readmission rates)</li> </ul>                                                          |
| Udayai et al. (2012) <sup>82</sup>     | Improvement in Discharge Process - Six Sigma<br><ul style="list-style-type: none"> <li>• The implementation of strategies using Six Sigma to improve discharge processes (billing hour, patient audits, office executive, priority for discharge, ward boys, discharge process flow)</li> </ul> | NR                                 | Hospital                                                          | Practice Change                                 | <ul style="list-style-type: none"> <li>• Discharge time was decreased by 21% (from 247 to 195 minutes)</li> <li>• Patients had improved satisfaction with the discharge process</li> </ul>            | <ul style="list-style-type: none"> <li>• Improving discharge time allowed for more patients to be managed, improving revenue</li> <li>• Leadership support and employee participation were essential for success</li> </ul>                            |
| Williams et al. (2010) <sup>52</sup>   | Critical Care Outreach Role<br><ul style="list-style-type: none"> <li>• The implementation of a critical care outreach role to facilitate communication between ICU and ward staff</li> </ul>                                                                                                   | Patients discharged from the ICU   | Hospital<br><br>Royal Perth Hospital, 22-bed ICU (570 total beds) | Practice Change<br><br>Information Sharing Live | <ul style="list-style-type: none"> <li>• Delayed discharges increased by 4% (from 27% to 31%)</li> </ul>                                                                                              | <ul style="list-style-type: none"> <li>• The critical care outreach role did not decrease delayed discharges</li> <li>• Reducing delays requires a collaborative approach focusing on hospital flow, rather than just the discharge process</li> </ul> |

1  
2  
3  
4  
5  
6  
7  
8  
9  
10  
11  
12  
13  
14  
15  
16  
17  
18  
19  
20  
21  
22  
23  
24  
25  
26  
27  
28  
29  
30  
31  
32  
33  
34  
35  
36  
37  
38  
39  
40  
41  
42  
43  
44  
45  
46  
47

| Author                             | Initiative Description/ Content                                                                                                                                                                           | Target Population                                                             | Setting                                                                       | Initiative Category <sup>1</sup>                | Results                                                                                                                                                                                                                                                                                                                                     | Key conclusions                                                                                                                                                            |
|------------------------------------|-----------------------------------------------------------------------------------------------------------------------------------------------------------------------------------------------------------|-------------------------------------------------------------------------------|-------------------------------------------------------------------------------|-------------------------------------------------|---------------------------------------------------------------------------------------------------------------------------------------------------------------------------------------------------------------------------------------------------------------------------------------------------------------------------------------------|----------------------------------------------------------------------------------------------------------------------------------------------------------------------------|
| Younis et al. (2011) <sup>53</sup> | Enhanced Recovery Program<br>• A program post-colorectal surgery to improve stoma management and expedite discharge time                                                                                  | Patients undergoing anterior resection with the formation of a loop ileostomy | Hospital<br><br>Single district general hospital                              | Practice Change<br><br>Information Sharing Live | <ul style="list-style-type: none"> <li>• Average length of stay decreased by 6 days</li> <li>• Significant decrease in percent of patients experiencing delayed discharge due to independent stoma management</li> </ul>                                                                                                                    | <ul style="list-style-type: none"> <li>• Pre-operatively integrating stoma management education into an enhanced recovery program can reduce delayed discharges</li> </ul> |
| <b>Grey Literature</b>             |                                                                                                                                                                                                           |                                                                               |                                                                               |                                                 |                                                                                                                                                                                                                                                                                                                                             |                                                                                                                                                                            |
| Anonymous (2008) <sup>99</sup>     | Expedited Discharge Fund<br>• A hospital fund to pay for services that are holding up a patient's discharge (medical equipment, pharmaceuticals, physical and occupational therapy, transportation, etc.) | Uninsured patients                                                            | Hospital<br><br>Iowa City, University of Iowa Hospital, 700 beds              | Infrastructure and Finance                      | <ul style="list-style-type: none"> <li>• A patient from a rural area was provided with \$40/week for medications and gas to travel to a hospital that provided specialized wound care</li> <li>• A social worker found a group home for people with a mental health diagnosis for a patient who had no social support or funding</li> </ul> | <ul style="list-style-type: none"> <li>• Patients can be safely discharged through support from the discharge fund</li> </ul>                                              |
| Anonymous (2010) <sup>46</sup>     | Meetings<br>• Daily and weekly meetings to discuss issues with patient throughput and strategies for eliminating barriers                                                                                 | NR                                                                            | Hospital<br><br>University of Cincinnati Health University Hospital, 693 beds | Information Sharing Live                        | <ul style="list-style-type: none"> <li>• Decreased average length of stay by 5.34 hours</li> <li>• Increased accuracy of predicting next day discharges from the medical/surgical units by 40%</li> </ul>                                                                                                                                   | <ul style="list-style-type: none"> <li>• NR</li> </ul>                                                                                                                     |
| Calveley (2007) <sup>83</sup>      | Tiered Community-Based Services<br>• Three tiers of services to allow for people to be cared for in their own homes or residential units, instead of in hospital                                          | NR                                                                            | Hospital<br><br>Four Seasons Health Care, 18000 beds                          | Practice Change                                 | <ul style="list-style-type: none"> <li>• NR</li> </ul>                                                                                                                                                                                                                                                                                      | <ul style="list-style-type: none"> <li>• Healthcare solutions should be developed in partnership with health and community service providers</li> </ul>                    |

| Author                                  | Initiative Description/ Content                                                                                                                                                                                                                                                                                                                   | Target Population                                | Setting                                          | Initiative Category <sup>1</sup>            | Results                                                                                                                                                                                | Key conclusions                                                                                                                                                                                                              |
|-----------------------------------------|---------------------------------------------------------------------------------------------------------------------------------------------------------------------------------------------------------------------------------------------------------------------------------------------------------------------------------------------------|--------------------------------------------------|--------------------------------------------------|---------------------------------------------|----------------------------------------------------------------------------------------------------------------------------------------------------------------------------------------|------------------------------------------------------------------------------------------------------------------------------------------------------------------------------------------------------------------------------|
| Manzano-Santaella (2009) <sup>100</sup> | Payment by Results and Delayed Discharges Act<br><ul style="list-style-type: none"> <li>• Payment by Results pays providers a fixed price for each individual case, while with the Delayed Discharges Act, local authorities are financially responsible when patients remain in hospital because community care has not been arranged</li> </ul> | NR                                               | NR                                               | Infrastructure and Finance                  | <ul style="list-style-type: none"> <li>• Payment by Results and the Delayed Discharges Act are related policies</li> </ul>                                                             | <ul style="list-style-type: none"> <li>• Quantitative measures (days delayed and costs) conflict with the social aspects of overall health and well-being</li> </ul>                                                         |
| Krystal (2019) <sup>86</sup>            | Southlake@Home<br><ul style="list-style-type: none"> <li>• A team designed to meet the patients care needs through partnerships with community and primary care (integrates primary care, hospital care and home and community care to develop a personalized care plan)</li> </ul>                                                               | Medically and socially complex and frail elderly | Hospital<br><br>Southlake Regional Health Centre | Practice Change                             | <ul style="list-style-type: none"> <li>• Reduction in ALC days (average of 10.6 days)</li> <li>• 1088 ALC days avoided</li> <li>• Positive patient and provider experiences</li> </ul> | <ul style="list-style-type: none"> <li>• Engaging partners early in the conception of the program was critical to its success</li> </ul>                                                                                     |
| Walker (2011) <sup>2</sup>              | Recommendations for Improving Care for the Aging Population<br><ul style="list-style-type: none"> <li>• Numerous recommendations to improve ALC in acute and community care ranging from proactively identifying patients at risk of decline in primary care to making hospitals more 'senior friendly.'</li> </ul>                               | NR                                               | NR                                               | Information Sharing Recommendation Document | <ul style="list-style-type: none"> <li>• NR</li> </ul>                                                                                                                                 | <ul style="list-style-type: none"> <li>• Community supports should be increased to keep people in their home as long as possible</li> <li>• Programs and services should be aimed at restoration and reactivation</li> </ul> |
| North West Community Care Access        | Wait at Home<br><ul style="list-style-type: none"> <li>• Allows seniors to get their healthcare needs from their</li> </ul>                                                                                                                                                                                                                       | Seniors waiting for                              | NR                                               | Practice Change                             | <ul style="list-style-type: none"> <li>• NR</li> </ul>                                                                                                                                 | <ul style="list-style-type: none"> <li>• Staying home provides benefits for seniors including fewer risks</li> </ul>                                                                                                         |

| Author                                                            | Initiative Description/ Content                                                                                                                                                                                                      | Target Population | Setting | Initiative Category <sup>1</sup>                                                  | Results                                                                                                             | Key conclusions                                                               |
|-------------------------------------------------------------------|--------------------------------------------------------------------------------------------------------------------------------------------------------------------------------------------------------------------------------------|-------------------|---------|-----------------------------------------------------------------------------------|---------------------------------------------------------------------------------------------------------------------|-------------------------------------------------------------------------------|
| Centre (2011) <sup>88</sup>                                       | home through a variety of services for a up to 90 days                                                                                                                                                                               | LTC placement     |         |                                                                                   |                                                                                                                     | (germs/ viruses) and a familiar setting compared to the hospital              |
| Toronto Central Community Care Access Centre (2015) <sup>67</sup> | ALC Avoidance Framework<br>• To create a standardized approach to avoid delayed discharges through 12 leadings practices and associated strategies (identifying a date of discharge, engaging with substitute decision makers, etc.) | NR                | NR      | Tools and Guidelines                                                              | • NR                                                                                                                | • This framework can help improve results around ALC avoidance and management |
| Province of New Brunswick (2017) <sup>92</sup>                    | ALC Collaborative Committee<br>• A committee developed to identify and implement priority strategic initiatives                                                                                                                      | NR                | NR      | Information Sharing Live<br><br>Practice Change<br><br>Infrastructure and Finance | • Reduction in percentage of acute hospital days used by patients waiting for discharge from 19.6% to 17.5%         | • NR                                                                          |
| NHS Improvement (2018) <sup>104</sup>                             | SAFER Patient Flow Bundle<br>• A tool to reduce delays for patients on inpatient wards                                                                                                                                               | NR                | NR      | Information Sharing Recommendation Document                                       | • Most effective when used with Red2Green days<br>• Supports decision making by allowing staff to visualize plans   | • Clinical leadership is essential for implementing these initiatives         |
| Starr-Hemburrow (2010) <sup>91</sup>                              | Red2Green Days<br>• A tool to reduce unnecessary waiting by patients                                                                                                                                                                 | NR                | NR      |                                                                                   | • A board (electronic or white) should act as a focal point for rounds                                              |                                                                               |
| LHIN Collaborative (2011) <sup>87</sup>                           | Long-stay Patient Reviews<br>• Weekly reviews of long-stay patients (>20 days), to help address obstacles that are delaying discharge                                                                                                | NR                | NR      |                                                                                   | • Weekly long-stay patient reviews can reduce the number of inpatients with a length of stay > 20 days by up to 50% |                                                                               |
| Shah (2011) <sup>90</sup>                                         |                                                                                                                                                                                                                                      |                   |         |                                                                                   |                                                                                                                     |                                                                               |

| Author                                                | Initiative Description/ Content                                                                                                                                            | Target Population                          | Setting                                                                      | Initiative Category <sup>1</sup> | Results                                                                                                               | Key conclusions                                                                                                                                                                         |
|-------------------------------------------------------|----------------------------------------------------------------------------------------------------------------------------------------------------------------------------|--------------------------------------------|------------------------------------------------------------------------------|----------------------------------|-----------------------------------------------------------------------------------------------------------------------|-----------------------------------------------------------------------------------------------------------------------------------------------------------------------------------------|
|                                                       | Multiagency Discharge Event (MADE)<br>• Review of individual patient journeys by bringing together senior staff from health and social care                                | NR                                         | NR                                                                           |                                  | • Greatest impact on patients with a length of stay > 6 days                                                          |                                                                                                                                                                                         |
| Central East LHIN ALC Task Group (2008) <sup>84</sup> | Home First<br>• A program designed to help keep patients in their homes (with community supports) for as long as possible by connecting patients to their needed resources | NR                                         | Hospital<br><br>Halton Health Services, 459 beds                             | Practice Change                  | • Percent of ALC (acute) reduced from 22-28% to 4-6%                                                                  | • Culture change requires support and attention to be sustained over time                                                                                                               |
| Adams, Care and Repair England (2017) <sup>98</sup>   | Home First<br>• A program designed to help keep high needs seniors in their homes (with community supports) for as long as possible and involve the family in care         | Patients (specifically high needs seniors) | NR                                                                           | Practice Change                  | • NR                                                                                                                  | • Home First should be implemented as a system-wide approach                                                                                                                            |
| Shah (2010) <sup>89</sup>                             | Home First<br>• A program designed to help keep patients in their homes (with enhanced home care supports) as they wait for long-term care                                 | High need seniors (75+)                    | Trillium Health Partners, various community and long-term care organizations | Practice Change                  | • 2-fold reduction in monthly average of ALC patients<br>• 30.5% reduction in number of ALC to LTC hospital referrals | • Key success factors included: eliminating long discharge processes, having engaged leadership, having measurable targets, monitoring performance and educating patients and providers |
| Joint Improvement Team (2013) <sup>85</sup>           | • NR                                                                                                                                                                       | ALC patients                               | Nine community hospital corporations, 14 hospital sites and a mental health  | Practice Change                  | • Expected to reduced ALC days by 30% over the next three years                                                       | • ALC is a complex issue and requires coordination across sectors<br>• Implementation of the recommendations will help to reduce ALC days and improve patient flow                      |

| Author                                              | Initiative Description/ Content                                                                                                                                                              | Target Population | Setting                                                                    | Initiative Category <sup>1</sup> | Results                                                                                                                                                                                                                                                                                                                | Key conclusions                                                                                                                           |
|-----------------------------------------------------|----------------------------------------------------------------------------------------------------------------------------------------------------------------------------------------------|-------------------|----------------------------------------------------------------------------|----------------------------------|------------------------------------------------------------------------------------------------------------------------------------------------------------------------------------------------------------------------------------------------------------------------------------------------------------------------|-------------------------------------------------------------------------------------------------------------------------------------------|
|                                                     |                                                                                                                                                                                              |                   | centre in one Ontario region<br>Total of 1642 beds across the facilities   |                                  |                                                                                                                                                                                                                                                                                                                        |                                                                                                                                           |
| Adams, Care and Repair England (2017) <sup>98</sup> | West of England Care and Repair<br>• Enables older patients to return home from hospital quickly and safely by organizing and repairing home (cleaning, clearing clutter, small adaptations) | Older patients    | West of England Care and Repair                                            | Infrastructure and Finance       | • Substantial cost savings in hospital bed days, housing interventions and hospital staff time                                                                                                                                                                                                                         | • Large savings for the health system can be generated with the implementation of this intervention                                       |
| Shah (2010) <sup>89</sup>                           | Home First<br>• A program designed to help keep patients in their homes (with community supports)                                                                                            | Elderly patients  | Hospital/ community in Mississauga Halton Local Health Integration Network | Practice Change                  | • The equivalent of 35 acute care beds have been saved over 2 years<br>• 250 people have been diverted from LTC placement                                                                                                                                                                                              | • Allows patients the opportunity to regain independence and return home<br>• ALC solutions need a collaborative, cross-sectoral approach |
| Joint Improvement Team (2013) <sup>85</sup>         | Home First – 10 Actions to Transform Discharge<br>• Actions to improve the pathway from hospital to home focusing on achieving safe, timely and person-centred care                          | NR                | NR                                                                         | Practice Change                  | • Factors in reducing delays include: identifying estimated date of discharge, using a framework for admissions, transfers and discharges, appointing a provider for coordinating the patients discharge plan, screening for frailty, using transitional and intermediate care services, adopting a home first culture | • There are a number of factors to successfully reduce delays                                                                             |

851 Abbreviations: ALC = alternate level of care; ERAS = Enhanced Recovery After Surgery; GM = geriatric medicine; OAP = Old Age Psychiatry; AHK = almost  
852 home kids

## Figures

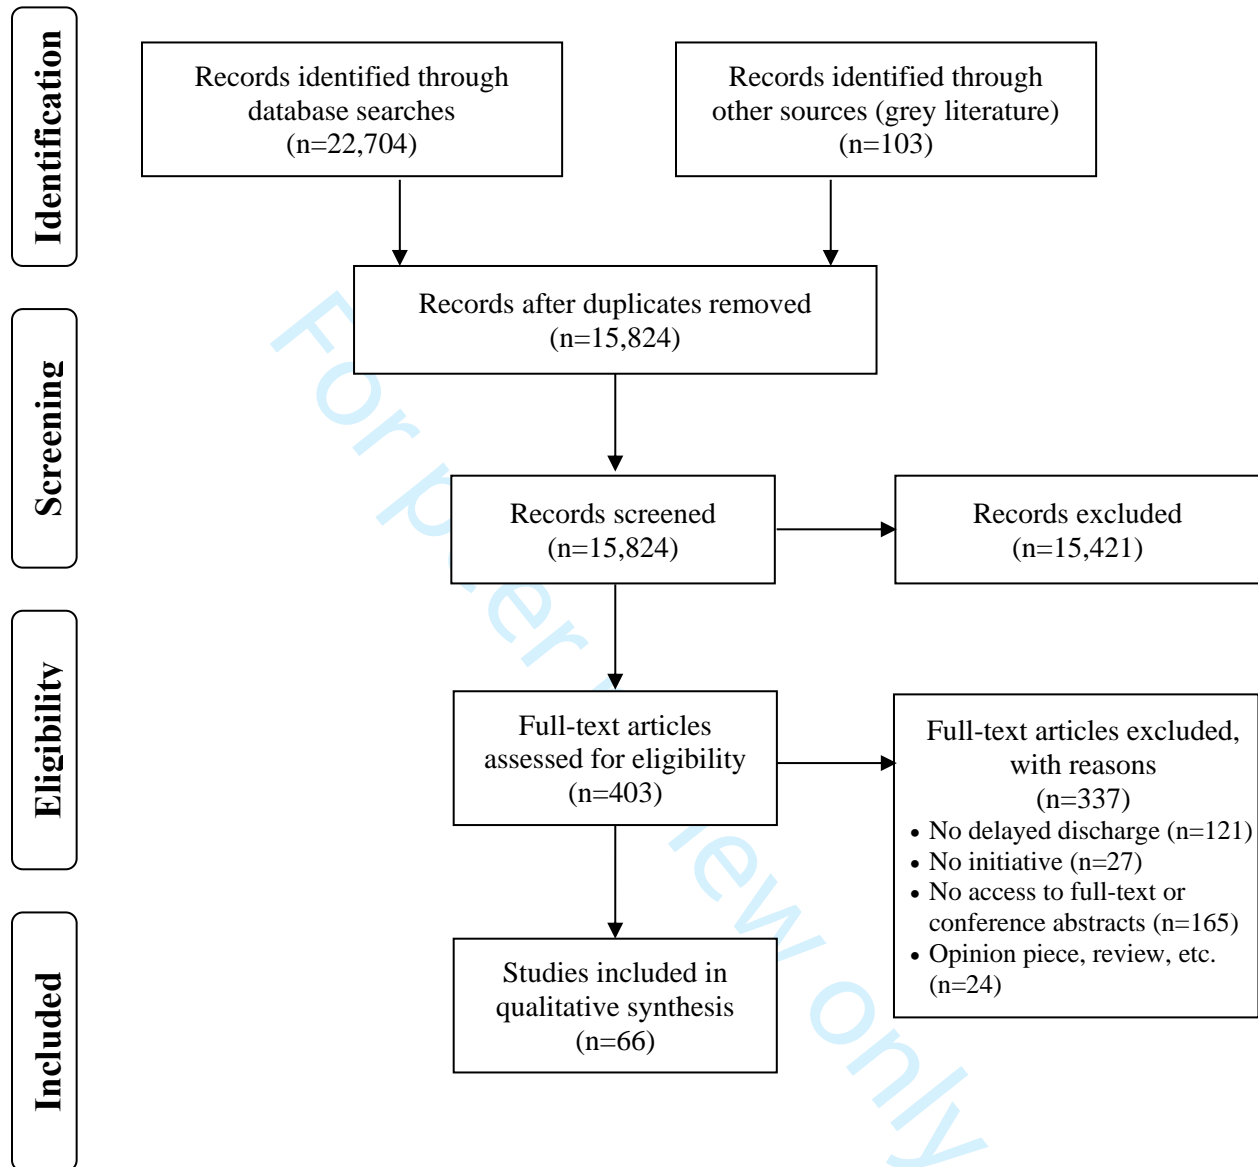

Figure 1. PRISMA flow diagram of included articles



## Supplementary material

Supplementary Table 1. Preferred Reporting Items for Systematic reviews and Meta-Analyses extension for Scoping Reviews (PRISMA-ScR) Checklist

| SECTION                           | ITEM | PRISMA-ScR CHECKLIST ITEM                                                                                                                                                                                                                                                                                  | REPORTED ON PAGE #    |
|-----------------------------------|------|------------------------------------------------------------------------------------------------------------------------------------------------------------------------------------------------------------------------------------------------------------------------------------------------------------|-----------------------|
| <b>TITLE</b>                      |      |                                                                                                                                                                                                                                                                                                            |                       |
| Title                             | 1    | Identify the report as a scoping review.                                                                                                                                                                                                                                                                   | Page 1                |
| <b>ABSTRACT</b>                   |      |                                                                                                                                                                                                                                                                                                            |                       |
| Structured summary                | 2    | Provide a structured summary that includes (as applicable): background, objectives, eligibility criteria, sources of evidence, charting methods, results, and conclusions that relate to the review questions and objectives.                                                                              | Pages 2-3             |
| <b>INTRODUCTION</b>               |      |                                                                                                                                                                                                                                                                                                            |                       |
| Rationale                         | 3    | Describe the rationale for the review in the context of what is already known. Explain why the review questions/objectives lend themselves to a scoping review approach.                                                                                                                                   | Pages 4-6             |
| Objectives                        | 4    | Provide an explicit statement of the questions and objectives being addressed with reference to their key elements (e.g., population or participants, concepts, and context) or other relevant key elements used to conceptualize the review questions and/or objectives.                                  | Page 6                |
| <b>METHODS</b>                    |      |                                                                                                                                                                                                                                                                                                            |                       |
| Protocol and registration         | 5    | Indicate whether a review protocol exists; state if and where it can be accessed (e.g., a Web address); and if available, provide registration information, including the registration number.                                                                                                             | Page 6                |
| Eligibility criteria              | 6    | Specify characteristics of the sources of evidence used as eligibility criteria (e.g., years considered, language, and publication status), and provide a rationale.                                                                                                                                       | Page 7                |
| Information sources*              | 7    | Describe all information sources in the search (e.g., databases with dates of coverage and contact with authors to identify additional sources), as well as the date the most recent search was executed.                                                                                                  | Page 7                |
| Search                            | 8    | Present the full electronic search strategy for at least 1 database, including any limits used, such that it could be repeated.                                                                                                                                                                            | Supplementary Table 2 |
| Selection of sources of evidence† | 9    | State the process for selecting sources of evidence (i.e., screening and eligibility) included in the scoping review.                                                                                                                                                                                      | Pages 7-8             |
| Data charting process‡            | 10   | Describe the methods of charting data from the included sources of evidence (e.g., calibrated forms or forms that have been tested by the team before their use, and whether data charting was done independently or in duplicate) and any processes for obtaining and confirming data from investigators. | Pages 8-9             |
| Data items                        | 11   | List and define all variables for which data were sought and any assumptions and simplifications made.                                                                                                                                                                                                     | Page 9                |

| SECTION                                                           | ITEM | PRISMA-ScR CHECKLIST ITEM                                                                                                                                                                             | REPORTED ON PAGE #              |
|-------------------------------------------------------------------|------|-------------------------------------------------------------------------------------------------------------------------------------------------------------------------------------------------------|---------------------------------|
| Critical appraisal of individual sources of evidence <sup>§</sup> | 12   | If done, provide a rationale for conducting a critical appraisal of included sources of evidence; describe the methods used and how this information was used in any data synthesis (if appropriate). | Not applicable                  |
| Synthesis of results                                              | 13   | Describe the methods of handling and summarizing the data that were charted.                                                                                                                          | Pages 9-10                      |
| <b>RESULTS</b>                                                    |      |                                                                                                                                                                                                       |                                 |
| Selection of sources of evidence                                  | 14   | Give numbers of sources of evidence screened, assessed for eligibility, and included in the review, with reasons for exclusions at each stage, ideally using a flow diagram.                          | Page 11, Flow diagram in figure |
| Characteristics of sources of evidence                            | 15   | For each source of evidence, present characteristics for which data were charted and provide the citations.                                                                                           | Pages 10-11                     |
| Critical appraisal within sources of evidence                     | 16   | If done, present data on critical appraisal of included sources of evidence (see item 12).                                                                                                            | Not applicable                  |
| Results of individual sources of evidence                         | 17   | For each included source of evidence, present the relevant data that were charted that relate to the review questions and objectives.                                                                 | Pages 35-59 (tables)            |
| Synthesis of results                                              | 18   | Summarize and/or present the charting results as they relate to the review questions and objectives.                                                                                                  | Pages 11-17                     |
| <b>DISCUSSION</b>                                                 |      |                                                                                                                                                                                                       |                                 |
| Summary of evidence                                               | 19   | Summarize the main results (including an overview of concepts, themes, and types of evidence available), link to the review questions and objectives, and consider the relevance to key groups.       | Pages 17-21                     |
| Limitations                                                       | 20   | Discuss the limitations of the scoping review process.                                                                                                                                                | Page 22                         |
| Conclusions                                                       | 21   | Provide a general interpretation of the results with respect to the review questions and objectives, as well as potential implications and/or next steps.                                             | Page 23                         |
| <b>FUNDING</b>                                                    |      |                                                                                                                                                                                                       |                                 |
| Funding                                                           | 22   | Describe sources of funding for the included sources of evidence, as well as sources of funding for the scoping review. Describe the role of the funders of the scoping review.                       | Page 24                         |

JB1 = Joanna Briggs Institute; PRISMA-ScR = Preferred Reporting Items for Systematic reviews and Meta-Analyses extension for Scoping Reviews.

\* Where *sources of evidence* (see second footnote) are compiled from, such as bibliographic databases, social media platforms, and Web sites.

† A more inclusive/heterogeneous term used to account for the different types of evidence or data sources (e.g., quantitative and/or qualitative research, expert opinion, and policy documents) that may be eligible in a scoping review as opposed to only studies. This is not to be confused with *information sources* (see first footnote).

‡ The frameworks by Arksey and O'Malley (6) and Levac and colleagues (7) and the JBI guidance (4, 5) refer to the process of data extraction in a scoping review as data charting.

§ The process of systematically examining research evidence to assess its validity, results, and relevance before using it to inform a decision. This term is used for items 12 and 19 instead of "risk of bias" (which is more applicable to systematic reviews of interventions) to include and acknowledge the various sources of evidence that may be used in a scoping review (e.g., quantitative and/or qualitative research, expert opinion, and policy document).

From: Tricco AC, Lillie E, Zarin W, O'Brien KK, Colquhoun H, Levac D, et al. PRISMA Extension for Scoping Reviews (PRISMA-ScR): Checklist and Explanation. *Ann Intern Med.* 2018;169:467–473. doi: [10.7326/M18-0850](https://doi.org/10.7326/M18-0850).

Supplementary Table 2. Medline Search Strategy

| #  | Search Term                                                                                                                                                                                               | Results (# of articles) |
|----|-----------------------------------------------------------------------------------------------------------------------------------------------------------------------------------------------------------|-------------------------|
| 1  | (alternat* level* adj2 care).tw,kf                                                                                                                                                                        | 74                      |
| 2  | (bed adj2 (block* or occup* or delay* or capacit* or over?crowd*)).tw,kf                                                                                                                                  | 1756                    |
| 3  | Bed Occupancy/                                                                                                                                                                                            | 2468                    |
| 4  | ((delay* or late* or defer* or post?pon*) adj2 (discharg* or transfer* or handoff* or handover* or releas*)).tw,kf                                                                                        | 10642                   |
| 5  | (delay* or late* or defer* or post?pon*).tw,kf                                                                                                                                                            | 1759017                 |
| 6  | Patient Discharge/                                                                                                                                                                                        | 27462                   |
| 7  | 5 and 6                                                                                                                                                                                                   | 1847                    |
| 8  | (stranded patient).tw,kf                                                                                                                                                                                  | 2                       |
| 9  | 1 or 2 or 3 or 4 or 7 or 8                                                                                                                                                                                | <b>15908</b>            |
| 10 | Health Plan Implementation/ or delivery of health care/ or health care reform/ or patient care management/ or critical pathways/ or guideline/ or practice guideline/ or health policy/                   | 215111                  |
| 11 | (strateg* or intervention* or program* or service* or model* or initiative* or polic* or plan* or re?design* or design* or tool* or system* or guideline* or practice guideline* or best practice*).tw,kf | 9434922                 |
| 12 | ("health plan implementation" or "health?care delivery" or "health?care reform*" or "patient care management" or "critical pathway*").tw,kf                                                               | 8472                    |
| 13 | 10 or 11 or 12                                                                                                                                                                                            | <b>9526394</b>          |
| 14 | 9 and 13                                                                                                                                                                                                  | 8141                    |
| 15 | <b>Limit 14 to (case reports or comment or editorial or letter)</b>                                                                                                                                       | <b>238</b>              |
| 16 | <b>14 not 15</b>                                                                                                                                                                                          | <b>7903</b>             |
| 17 | <b>limit 16 to yr="2004-Current"</b>                                                                                                                                                                      | <b>5519</b>             |

Supplementary Table 3. Definitions and Characteristics of Delayed Discharges from Database Searches

| Author                       | Definition of ALC/ Delayed Discharge                                                                                                        | Reason for Hospitalization                                                                                                                                      | Reason for Delayed Discharge                                                                                                    | Length of Delayed Discharge |
|------------------------------|---------------------------------------------------------------------------------------------------------------------------------------------|-----------------------------------------------------------------------------------------------------------------------------------------------------------------|---------------------------------------------------------------------------------------------------------------------------------|-----------------------------|
| Adlington et al. (2018) [40] | •NR                                                                                                                                         | Psychiatric condition                                                                                                                                           | NR                                                                                                                              | NR                          |
| Ardagh et al. (2011) [41]    | •NR                                                                                                                                         | NR                                                                                                                                                              | Limited access to aged care beds                                                                                                | NR                          |
| Arendts et al. (2013) [42]   | •NR                                                                                                                                         | Cerebrovascular insufficiency, fractured neck of femur, cardiac failure, myocardial ischaemia, respiratory tract infection, chronic airway disease exacerbation | NR                                                                                                                              | NR                          |
| Baumann et al. (2007) [43]   | •Waiting longer in hospital than necessary.                                                                                                 | NR                                                                                                                                                              | NR                                                                                                                              | NR                          |
| Behan (2005) [44]            | •Staying in hospital because community care arrangements have not been made                                                                 | NR                                                                                                                                                              | No arrangements for community care                                                                                              | NR                          |
| Béland et al. (2006) [45]    | •Waiting in hospital for a nursing home placement<br>•Referred to as bed-blockers                                                           | NR                                                                                                                                                              | NR                                                                                                                              | NR                          |
| Blecker et al. (2015) [46]   | •NR                                                                                                                                         | Medical, surgical or other services                                                                                                                             | Delays in care on the weekend                                                                                                   | NR                          |
| Boutette et al. (2018) [47]  | •Patients who are medically stable or stabilizing and are no longer acutely ill                                                             | NR                                                                                                                                                              | NR                                                                                                                              | NR                          |
| Bowen et al. (2014) [48]     | •Remaining in hospital after the patient was considered ready for discharge                                                                 | NR                                                                                                                                                              | Not completing take home prescriptions on time                                                                                  | NR                          |
| Boyd (2017) [49]             | •Increasing length of stay because hospital staff does not discharge patient when once they are identified as medically ready for discharge | NR                                                                                                                                                              | Lack of coordination and communication between physicians and other staff                                                       | NR                          |
| Brankline (2009) [50]        | •NR                                                                                                                                         | NR                                                                                                                                                              | Social workers were without access to the patients' chart, nurses were not available, fax was not received by the care facility | NR                          |

| Author                      | Definition of ALC/ Delayed Discharge                                                                                                                                                                          | Reason for Hospitalization                                          | Reason for Delayed Discharge                                                                                                                                                             | Length of Delayed Discharge                                                                                        |
|-----------------------------|---------------------------------------------------------------------------------------------------------------------------------------------------------------------------------------------------------------|---------------------------------------------------------------------|------------------------------------------------------------------------------------------------------------------------------------------------------------------------------------------|--------------------------------------------------------------------------------------------------------------------|
| Brown et al. (2008) [51]    | •NR                                                                                                                                                                                                           | NR                                                                  | Doctor's order delay, nurse unavailable, bed unavailable, transportation unavailable, waiting for radiography, medical, inadequate pain management, uncontrolled nausea/ vomiting, other | NR                                                                                                                 |
| Burr et al. (2017) [52]     | •Occupying an acute hospital bed, but not requiring the level of resources or services provided in the acute setting                                                                                          | NR                                                                  | NR                                                                                                                                                                                       | NR                                                                                                                 |
| Caminiti et al. (2013) [53] | •Patients who had an unnecessary hospital stay (so signs, symptoms or diagnoses)                                                                                                                              | NR                                                                  | Waiting for tests, lab results, consultations, surgery, transfer to another unit, IV antibiotic treatment not completed, home care services not arranged, lack of transportation, other  | NR                                                                                                                 |
| Chidwick et al. (2017) [54] | •Occupying a hospital bed when acute care treatment has completed or the patient no longer requires the intensity of hospital resources                                                                       | NR                                                                  | NR                                                                                                                                                                                       | NR                                                                                                                 |
| El-Eid et al. (2015) [55]   | •NR                                                                                                                                                                                                           | NR                                                                  | NR                                                                                                                                                                                       | NR                                                                                                                 |
| Gaughan et al. (2015) [56]  | •Occurring when a patient is medically ready for hospital discharge to be cared for in an alternative setting                                                                                                 | NR                                                                  | Unclear                                                                                                                                                                                  | Days of delay over 5 years (monthly average) = 784.9<br><br>Delayed patients over 5 years (monthly average) = 28.4 |
| Graham et al. (2012) [57]   | <ul style="list-style-type: none"> <li>•Patients with morning operations who were not discharged the same day</li> <li>•Patients with afternoon operations who were not discharged within 24 hours</li> </ul> | Laparoscopic cholecystectomy or laparoscopic inguinal hernia repair | Post-operative nausea and vomiting, pain, difficulty voiding, urinary retention, wound haematoma, post-operative hypotension and social reasons                                          | NR                                                                                                                 |

| Author                          | Definition of ALC/ Delayed Discharge                                                                                                                                                                                  | Reason for Hospitalization    | Reason for Delayed Discharge                                                                                                          | Length of Delayed Discharge                                                                              |
|---------------------------------|-----------------------------------------------------------------------------------------------------------------------------------------------------------------------------------------------------------------------|-------------------------------|---------------------------------------------------------------------------------------------------------------------------------------|----------------------------------------------------------------------------------------------------------|
| Gutmanis et al. (2016) [58]     | •NR                                                                                                                                                                                                                   | NR                            | Responsive behaviours                                                                                                                 | NR                                                                                                       |
| Henwood (2006) [59]             | •Delayed discharges (still often referred to by the pejorative term ‘bed blocking’)                                                                                                                                   | NR                            | NR                                                                                                                                    | NR                                                                                                       |
| Holland et al. (2016) [60]      | •Discharge occurring beyond the time determined by the provider and patient                                                                                                                                           | NR                            | Incomplete dismissal summary, unavailability of discharge prescriptions and miscommunication among team members about discharge plans | Delay time = 23.6 days                                                                                   |
| Katsaliaki et al. (2005) [61]   | •NR                                                                                                                                                                                                                   | NR                            | NR                                                                                                                                    | NR                                                                                                       |
| Lees-Deutsch et al. (2019) [62] | •NR                                                                                                                                                                                                                   | NR                            | Delays in medications being prescribed, outstanding investigations, transportation delays, general practitioner note                  | Mean = 4 hours 51 minutes<br>Range = 50 minutes to 10 hours 22 minutes                                   |
| Levin et al. (2019) [63]        | •Remaining in hospital after the patient was considered medically ready for discharge                                                                                                                                 | NR                            | Lack of appropriate community care or support                                                                                         | Intervention:<br>2013 = 8262 days; 2016 = 3499 days<br><br>Control:<br>2013 = 1354 days; 2016 = 993 days |
| Lian et al. (2008) [64]         | •Delaying discharge for a reason that is not related to the infant’s illness following discharge clearance from the medical team                                                                                      | Premature infant              | Minimum weight not achieved, delayed planning or delivery of discharge plan to parents, lack of ownership over discharge planning     | 257 discharge delay days, mean = 7 days/ infant                                                          |
| Maessen et al. (2008) [65]      | •Meeting all discharge criteria (tolerance to food, good pain control, defecation and independence in activities of daily living to preoperative level), but not being discharged at the moment the patient was ready | Elective colorectal resection | Additional wound care, symptoms of an anastomotic leakage                                                                             | Pre: Median = 2, range = 0–17 days<br>Post: median = 1, range = 0–9 days                                 |

| Author                      | Definition of ALC/ Delayed Discharge                                                                                                                                                                                                                                                                     | Reason for Hospitalization                                                                                                                               | Reason for Delayed Discharge                                                                                                                                                                                                                                                                               | Length of Delayed Discharge                                                                                                                  |
|-----------------------------|----------------------------------------------------------------------------------------------------------------------------------------------------------------------------------------------------------------------------------------------------------------------------------------------------------|----------------------------------------------------------------------------------------------------------------------------------------------------------|------------------------------------------------------------------------------------------------------------------------------------------------------------------------------------------------------------------------------------------------------------------------------------------------------------|----------------------------------------------------------------------------------------------------------------------------------------------|
| Mahant et al. (2008) [66]   | <ul style="list-style-type: none"> <li>Non-qualified hospital days occur when the Medical Care Appropriateness Protocol tool is applied to a patient and the criteria has not been met</li> </ul>                                                                                                        | NR - general pediatric inpatient unit                                                                                                                    | Waiting for tests, IV antibiotics not completed, receiving nutrition, still under observation/ investigation, waiting for rehabilitation/ long-term care bed, treatment tapering not complete, needs education, psychosocial/ economic, administrative delays/ documents not complete, waiting for consult | Non-qualified days:<br>Preintervention – 3859 of 8228 days<br>Intervention – 2413 of 7246 days                                               |
| Mahto et al. (2009) [67]    | <ul style="list-style-type: none"> <li>Involving the diabetes team late, resulting in a prolonged length of stay</li> </ul>                                                                                                                                                                              | Diabetes or other general medicine admission                                                                                                             | NR                                                                                                                                                                                                                                                                                                         | NR                                                                                                                                           |
| Maloney et al. (2007) [68]  | <ul style="list-style-type: none"> <li>NR</li> </ul>                                                                                                                                                                                                                                                     | NR                                                                                                                                                       | NR                                                                                                                                                                                                                                                                                                         | NR                                                                                                                                           |
| Manville et al. (2014) [69] | <ul style="list-style-type: none"> <li>Needing more supports before discharge or delayed recovery of elderly hospitalized patients</li> </ul>                                                                                                                                                            | Dementia, delirium, confusion, fall, fracture, injury, frailty or failure to thrive, infection, cardiac condition, psychiatric or neurological condition | Dementia, immobility, falls or fractures post-rehabilitation, fragility, caregiver burden, cancer                                                                                                                                                                                                          | NR                                                                                                                                           |
| Meehan et al. (2018) [70]   | <ul style="list-style-type: none"> <li>Requiring additional supports for care needs after patients are identified as ‘clinically optimized’</li> </ul>                                                                                                                                                   | NR                                                                                                                                                       | NR                                                                                                                                                                                                                                                                                                         | NR                                                                                                                                           |
| Moeller et al. (2006) [71]  | <ul style="list-style-type: none"> <li>Discharge that occurs after a patient has been identified as ready for discharge (normalized vital signs, baseline status of lung function and oxygenation, negative blood culture, appropriate blood cell count, stabilization of comorbid illnesses)</li> </ul> | Community acquired pneumonia                                                                                                                             | Additional tests required, patients felt unready for discharge, delay in acquiring home support, nausea, concerns with treatment compliance                                                                                                                                                                | Discharged at time of stability:<br>mean LoS = 6.7 days<br>median LoS = 5.5<br><br>Increased LoS:<br>mean LoS = 7.9 days<br>median LoS = 7.5 |

| Author                        | Definition of ALC/ Delayed Discharge                                                                                                                                    | Reason for Hospitalization  | Reason for Delayed Discharge                                                                                                                                                                                                                  | Length of Delayed Discharge                                                            |
|-------------------------------|-------------------------------------------------------------------------------------------------------------------------------------------------------------------------|-----------------------------|-----------------------------------------------------------------------------------------------------------------------------------------------------------------------------------------------------------------------------------------------|----------------------------------------------------------------------------------------|
| Mur-Veeman et al. (2011) [72] | <ul style="list-style-type: none"> <li>Waiting to be admitted to next care setting (nursing home or home care) after completing treatment in current setting</li> </ul> | NR                          | NR                                                                                                                                                                                                                                            | NR                                                                                     |
| Niemeijer et al. (2010) [73]  | <ul style="list-style-type: none"> <li>NR</li> </ul>                                                                                                                    | Trauma, surgery, other      | Waiting for rehabilitation facility or nursing home, delays in discharge planning, waiting for an operation or diagnostic result, other factors                                                                                               | NR                                                                                     |
| Panis et al. (2004) [74]      | <ul style="list-style-type: none"> <li>Occurring from inappropriate hospital stays (when there is no medical indication for a hospital stay to continue)</li> </ul>     | Childbirth                  | Insurance companies not covering maternity care at home                                                                                                                                                                                       | Inappropriate days of stay:<br>2000: 72 (13.3%)<br>2001: 64 (14.7%)<br>2002: 30 (7.2%) |
| Patel et al. (2019) [75]      | <ul style="list-style-type: none"> <li>Discharging patients when it is medically safe to do so</li> </ul>                                                               | NR                          | Lack of communication between the multidisciplinary team members, incomplete discharge plans                                                                                                                                                  | NR                                                                                     |
| Pirani (2010) [76]            | <ul style="list-style-type: none"> <li>Waiting for discharge process after identified as medically and physically ready for discharge</li> </ul>                        | NR                          | Individual factors (personal choice, age, emotional disposition, support from family/ friends), medical factors (new medical problems), organizational factors (lack of home support, unavailability of nursing or rehabilitation facilities) | NR                                                                                     |
| Qin et al. (2017) [77]        | <ul style="list-style-type: none"> <li>Occupying a hospital bed for non-medical reasons after being identified as medically stable</li> </ul>                           | NR                          | NR                                                                                                                                                                                                                                            | NR                                                                                     |
| Rae et al. (2007) [78]        | <ul style="list-style-type: none"> <li>NR</li> </ul>                                                                                                                    | NR – acute general medicine | Lack of early family consultation, family refusal to take patient home, inadequate discharge planning, no discharge on Fridays or the weekend, staff                                                                                          | NR                                                                                     |



| Author                             | Definition of ALC/ Delayed Discharge                                                                | Reason for Hospitalization                                                                                            | Reason for Delayed Discharge                                                                                                                                                                                                                                                              | Length of Delayed Discharge                                                                                                |
|------------------------------------|-----------------------------------------------------------------------------------------------------|-----------------------------------------------------------------------------------------------------------------------|-------------------------------------------------------------------------------------------------------------------------------------------------------------------------------------------------------------------------------------------------------------------------------------------|----------------------------------------------------------------------------------------------------------------------------|
|                                    |                                                                                                     |                                                                                                                       | too busy to discharge all patients, adverse events, miscommunication across disciplines, too many patients on staffs' care, not all conditions dealt with, IV medications not transferred to oral, lack of diagnosis, waiting for rehabilitation services/ consultations, waiting for bed |                                                                                                                            |
| Roberts et al. (2013) [79]         | •NR                                                                                                 | Stroke, brain dysfunction, major multiple trauma, spinal cord dysfunction, other neurological condition or impairment | Cognitive/ psychological issues, waiting for home modifications, waiting for community services, lack of accommodation, waiting for nursing home placement, waiting for additional medication or surgical procedure                                                                       | Stroke Unit: Total additional days = 1821, range = 1-330<br>Brain Injury Unit: Total additional days = 4490, range = 1-673 |
| Sampson et al. (2006) [80]         | •NR                                                                                                 | NR                                                                                                                    | NR                                                                                                                                                                                                                                                                                        | NR                                                                                                                         |
| Shah (2007) [81]                   | •NR                                                                                                 | NR                                                                                                                    | Community services not arranged, patient's needs not assessed                                                                                                                                                                                                                             | NR                                                                                                                         |
| Sobotka et al. (2017) [82]         | •Remaining in hospital after reaching medical stability because of social or resource complications | Ventilator and tracheostomy management                                                                                | NR                                                                                                                                                                                                                                                                                        | NR                                                                                                                         |
| Starr-Hemburrow et al. (2011) [83] | •Waiting in a care setting for the appropriate level of care                                        | NR                                                                                                                    | NR                                                                                                                                                                                                                                                                                        | NR                                                                                                                         |
| Sutherland et al. (2013) [84]      | •Waiting for the appropriate post-acute care setting after being identified as ready for discharge  | NR                                                                                                                    | NR                                                                                                                                                                                                                                                                                        | NR                                                                                                                         |
| Taber et al. (2013) [85]           | •NR                                                                                                 | Kidney transplant                                                                                                     | Lack of medication education                                                                                                                                                                                                                                                              | NR                                                                                                                         |

| Author                      | Definition of ALC/ Delayed Discharge                                                          | Reason for Hospitalization                                          | Reason for Delayed Discharge                                                                                             | Length of Delayed Discharge                                                                         |
|-----------------------------|-----------------------------------------------------------------------------------------------|---------------------------------------------------------------------|--------------------------------------------------------------------------------------------------------------------------|-----------------------------------------------------------------------------------------------------|
| Udayai et al. (2012) [86]   | •NR                                                                                           | NR                                                                  | Lack of nurses or housekeepers, delayed manual delivery of papers, communication barriers, unavailability of wheelchairs | NR                                                                                                  |
| Williams et al. (2010) [87] | •Relocating the patient after 8 hours of being identified as ready for discharge from the ICU | Cardiac surgery, trauma, sepsis, other medical condition or surgery | No available bed, medical concern, lack of suitable accommodation, staff shortage, poor skill mix                        | 2001: median delay time = 29 hours (max=26 days)<br>2008: median delay time = 25 hours (max=8 days) |
| Younis et al. (2011) [88]   | •Remaining in hospital for longer than 5 days                                                 | Stoma formation following colorectal surgery                        | Delayed independent management of ileostomy                                                                              | Greater than 5 days                                                                                 |

Preferred Reporting Items for Systematic reviews and Meta-Analyses extension for Scoping Reviews (PRISMA-ScR) Checklist

| SECTION                           | ITEM | PRISMA-ScR CHECKLIST ITEM                                                                                                                                                                                                                                                                                  | REPORTED ON PAGE #    |
|-----------------------------------|------|------------------------------------------------------------------------------------------------------------------------------------------------------------------------------------------------------------------------------------------------------------------------------------------------------------|-----------------------|
| <b>TITLE</b>                      |      |                                                                                                                                                                                                                                                                                                            |                       |
| Title                             | 1    | Identify the report as a scoping review.                                                                                                                                                                                                                                                                   | Page 1                |
| <b>ABSTRACT</b>                   |      |                                                                                                                                                                                                                                                                                                            |                       |
| Structured summary                | 2    | Provide a structured summary that includes (as applicable): background, objectives, eligibility criteria, sources of evidence, charting methods, results, and conclusions that relate to the review questions and objectives.                                                                              | Pages 2-3             |
| <b>INTRODUCTION</b>               |      |                                                                                                                                                                                                                                                                                                            |                       |
| Rationale                         | 3    | Describe the rationale for the review in the context of what is already known. Explain why the review questions/objectives lend themselves to a scoping review approach.                                                                                                                                   | Pages 4-6             |
| Objectives                        | 4    | Provide an explicit statement of the questions and objectives being addressed with reference to their key elements (e.g., population or participants, concepts, and context) or other relevant key elements used to conceptualize the review questions and/or objectives.                                  | Page 6                |
| <b>METHODS</b>                    |      |                                                                                                                                                                                                                                                                                                            |                       |
| Protocol and registration         | 5    | Indicate whether a review protocol exists; state if and where it can be accessed (e.g., a Web address); and if available, provide registration information, including the registration number.                                                                                                             | Page 6                |
| Eligibility criteria              | 6    | Specify characteristics of the sources of evidence used as eligibility criteria (e.g., years considered, language, and publication status), and provide a rationale.                                                                                                                                       | Page 7                |
| Information sources*              | 7    | Describe all information sources in the search (e.g., databases with dates of coverage and contact with authors to identify additional sources), as well as the date the most recent search was executed.                                                                                                  | Page 7                |
| Search                            | 8    | Present the full electronic search strategy for at least 1 database, including any limits used, such that it could be repeated.                                                                                                                                                                            | Supplementary Table 2 |
| Selection of sources of evidence† | 9    | State the process for selecting sources of evidence (i.e., screening and eligibility) included in the scoping review.                                                                                                                                                                                      | Pages 7-8             |
| Data charting process‡            | 10   | Describe the methods of charting data from the included sources of evidence (e.g., calibrated forms or forms that have been tested by the team before their use, and whether data charting was done independently or in duplicate) and any processes for obtaining and confirming data from investigators. | Pages 8-9             |
| Data items                        | 11   | List and define all variables for which data were sought and any assumptions and simplifications made.                                                                                                                                                                                                     | Page 9                |
| Critical appraisal of individual  | 12   | If done, provide a rationale for conducting a critical appraisal of included sources of evidence; describe                                                                                                                                                                                                 | Not applicable        |

| SECTION                                       | ITEM | PRISMA-ScR CHECKLIST ITEM                                                                                                                                                                       | REPORTED ON PAGE #              |
|-----------------------------------------------|------|-------------------------------------------------------------------------------------------------------------------------------------------------------------------------------------------------|---------------------------------|
| sources of evidence§                          |      | the methods used and how this information was used in any data synthesis (if appropriate).                                                                                                      |                                 |
| Synthesis of results                          | 13   | Describe the methods of handling and summarizing the data that were charted.                                                                                                                    | Pages 9-10                      |
| <b>RESULTS</b>                                |      |                                                                                                                                                                                                 |                                 |
| Selection of sources of evidence              | 14   | Give numbers of sources of evidence screened, assessed for eligibility, and included in the review, with reasons for exclusions at each stage, ideally using a flow diagram.                    | Page 11, Flow diagram in figure |
| Characteristics of sources of evidence        | 15   | For each source of evidence, present characteristics for which data were charted and provide the citations.                                                                                     | Pages 10-11                     |
| Critical appraisal within sources of evidence | 16   | If done, present data on critical appraisal of included sources of evidence (see item 12).                                                                                                      | Not applicable                  |
| Results of individual sources of evidence     | 17   | For each included source of evidence, present the relevant data that were charted that relate to the review questions and objectives.                                                           | Pages 35-59 (tables)            |
| Synthesis of results                          | 18   | Summarize and/or present the charting results as they relate to the review questions and objectives.                                                                                            | Pages 11-17                     |
| <b>DISCUSSION</b>                             |      |                                                                                                                                                                                                 |                                 |
| Summary of evidence                           | 19   | Summarize the main results (including an overview of concepts, themes, and types of evidence available), link to the review questions and objectives, and consider the relevance to key groups. | Pages 17-21                     |
| Limitations                                   | 20   | Discuss the limitations of the scoping review process.                                                                                                                                          | Page 22                         |
| Conclusions                                   | 21   | Provide a general interpretation of the results with respect to the review questions and objectives, as well as potential implications and/or next steps.                                       | Page 23                         |
| <b>FUNDING</b>                                |      |                                                                                                                                                                                                 |                                 |
| Funding                                       | 22   | Describe sources of funding for the included sources of evidence, as well as sources of funding for the scoping review. Describe the role of the funders of the scoping review.                 | Page 24                         |

JBI = Joanna Briggs Institute; PRISMA-ScR = Preferred Reporting Items for Systematic reviews and Meta-Analyses extension for Scoping Reviews.

\* Where *sources of evidence* (see second footnote) are compiled from, such as bibliographic databases, social media platforms, and Web sites.

† A more inclusive/heterogeneous term used to account for the different types of evidence or data sources (e.g., quantitative and/or qualitative research, expert opinion, and policy documents) that may be eligible in a scoping review as opposed to only studies. This is not to be confused with *information sources* (see first footnote).

‡ The frameworks by Arksey and O'Malley (6) and Levac and colleagues (7) and the JBI guidance (4, 5) refer to the process of data extraction in a scoping review as data charting.

§ The process of systematically examining research evidence to assess its validity, results, and relevance before using it to inform a decision. This term is used for items 12 and 19 instead of "risk of bias" (which is more applicable to systematic reviews of interventions) to include and acknowledge the various sources of evidence that may be used in a scoping review (e.g., quantitative and/or qualitative research, expert opinion, and policy document).

From: Tricco AC, Lillie E, Zarin W, O'Brien KK, Colquhoun H, Levac D, et al. PRISMA Extension for Scoping Reviews (PRISMA-ScR): Checklist and Explanation. *Ann Intern Med.* 2018;169:467–473. doi: [10.7326/M18-0850](https://doi.org/10.7326/M18-0850).

# BMJ Open

## Initiatives for improving delayed discharge from a hospital setting: A scoping review

|                                 |                                                                                                                                                                                                                                                                                                                                                                                                                                                                                                 |
|---------------------------------|-------------------------------------------------------------------------------------------------------------------------------------------------------------------------------------------------------------------------------------------------------------------------------------------------------------------------------------------------------------------------------------------------------------------------------------------------------------------------------------------------|
| Journal:                        | <i>BMJ Open</i>                                                                                                                                                                                                                                                                                                                                                                                                                                                                                 |
| Manuscript ID                   | bmjopen-2020-044291.R1                                                                                                                                                                                                                                                                                                                                                                                                                                                                          |
| Article Type:                   | Original research                                                                                                                                                                                                                                                                                                                                                                                                                                                                               |
| Date Submitted by the Author:   | 18-Jan-2021                                                                                                                                                                                                                                                                                                                                                                                                                                                                                     |
| Complete List of Authors:       | Cadel, Lauren; Trillium Health Partners, Institute for Better Health; University of Toronto, Leslie Dan Faculty of Pharmacy<br>Guilcher, Sara; University of Toronto, Leslie Dan Faculty of Pharmacy<br>Kokorelias, Kristina; University of Toronto, Rehabilitation Sciences Institute<br>Sutherland, Jason; University of British Columbia<br>Glasby, Jon; University of Birmingham<br>Kiran, Tara; University of Toronto Department of Medicine,<br>Kuluski, Kerry; Trillium Health Partners, |
| <b>Primary Subject Heading</b>: | Health services research                                                                                                                                                                                                                                                                                                                                                                                                                                                                        |
| Secondary Subject Heading:      | Health policy, Communication                                                                                                                                                                                                                                                                                                                                                                                                                                                                    |
| Keywords:                       | Health & safety < HEALTH SERVICES ADMINISTRATION & MANAGEMENT, Health policy < HEALTH SERVICES ADMINISTRATION & MANAGEMENT, International health services < HEALTH SERVICES ADMINISTRATION & MANAGEMENT, Protocols & guidelines < HEALTH SERVICES ADMINISTRATION & MANAGEMENT, PRIMARY CARE                                                                                                                                                                                                     |
|                                 |                                                                                                                                                                                                                                                                                                                                                                                                                                                                                                 |

SCHOLARONE™  
Manuscripts

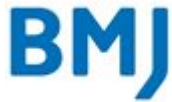

I, the Submitting Author has the right to grant and does grant on behalf of all authors of the Work (as defined in the below author licence), an exclusive licence and/or a non-exclusive licence for contributions from authors who are: i) UK Crown employees; ii) where BMJ has agreed a CC-BY licence shall apply, and/or iii) in accordance with the terms applicable for US Federal Government officers or employees acting as part of their official duties; on a worldwide, perpetual, irrevocable, royalty-free basis to BMJ Publishing Group Ltd ("BMJ") its licensees and where the relevant Journal is co-owned by BMJ to the co-owners of the Journal, to publish the Work in this journal and any other BMJ products and to exploit all rights, as set out in our [licence](#).

The Submitting Author accepts and understands that any supply made under these terms is made by BMJ to the Submitting Author unless you are acting as an employee on behalf of your employer or a postgraduate student of an affiliated institution which is paying any applicable article publishing charge ("APC") for Open Access articles. Where the Submitting Author wishes to make the Work available on an Open Access basis (and intends to pay the relevant APC), the terms of reuse of such Open Access shall be governed by a Creative Commons licence – details of these licences and which [Creative Commons](#) licence will apply to this Work are set out in our licence referred to above.

Other than as permitted in any relevant BMJ Author's Self Archiving Policies, I confirm this Work has not been accepted for publication elsewhere, is not being considered for publication elsewhere and does not duplicate material already published. I confirm all authors consent to publication of this Work and authorise the granting of this licence.

1 **Title:** Initiatives for improving delayed discharge from a hospital setting: A scoping review  
2  
3  
4  
5  
6

7 **Authors:**

8 Cadel, L<sup>1,2\*</sup>

9 Guilcher, SJT<sup>2,3</sup>

10 Kokorelias, KM<sup>4</sup>

11 Sutherland, JM<sup>5</sup>

12 Glasby, J<sup>6</sup>

13 Kiran, T<sup>3,7,8,9</sup>

14 Kuluski, K<sup>1,3</sup>

15 **Affiliations:**

16 <sup>1</sup> Institute for Better Health, Trillium Health Partners, Mississauga, Ontario, Canada

17 <sup>2</sup> Leslie Dan Faculty of Pharmacy, University of Toronto, Toronto, Ontario, Canada

18 <sup>3</sup> Institute of Health Policy, Management and Evaluation, Dalla Lana School of Public Health,  
19 University of Toronto, Toronto, Ontario, Canada

20 <sup>4</sup> Rehabilitation Sciences Institute, Faculty of Medicine, University of Toronto, Toronto,  
21 Ontario, Canada

22 <sup>5</sup> Centre for Health Services and Policy Research, School of Population and Public Health,  
23 University of British Columbia, Vancouver, British Columbia, Canada

24 <sup>6</sup> School of Social Policy, University of Birmingham, Edgbaston, Birmingham, United  
25 Kingdom

26 <sup>7</sup> Department of Family and Community Medicine, St. Michael's Hospital, University of  
27 Toronto, Toronto, Ontario, Canada

28 <sup>8</sup> MAP Centre for Urban Health Solutions, St. Michael's Hospital, Toronto, Ontario, Canada

29 <sup>9</sup> Ontario Health (Quality Division), Toronto, Ontario, Canada

30  
31 **\*Corresponding Author:**

32 Lauren Cadel

33 lauren.cadel@thp.ca

## 34 **Abstract**

35 **Objective:** The overarching objective of the scoping review was to examine peer-reviewed and  
36 grey literature for best practices that have been developed and/or evaluated for delayed discharge  
37 involving a hospital setting. Two specific objectives were to review what delayed discharge  
38 initiatives entailed and identify gaps in the literature in order to inform future work.

39 **Design:** Scoping review

40 **Methods:** Electronic databases and websites of government and healthcare organizations were  
41 searched for eligible articles. Articles were required to include an initiative that focused on  
42 delayed discharge, involve a hospital setting and be published between January 1, 2004 and  
43 August 16, 2019. Data were extracted using Microsoft Excel. Following extraction, a policy  
44 framework by Doern and Phidd was adapted to organize the included initiatives into categories:  
45 (1) Information Sharing; (2) Tools and Guidelines; (3) Practice Change; (4) Infrastructure and  
46 Finance; and (5) Other.

47 **Results:** Sixty-six articles were included in this review. The majority of initiatives were  
48 categorized as practice change (n=36), followed by information sharing (n=19) and tools and  
49 guidelines (n=19). Numerous initiatives incorporated multiple categories. The majority of  
50 initiatives were implemented by multidisciplinary teams and resulted in improved outcomes such  
51 as reduced length of stay and discharge delays. However, outcomes lacked experience measures,  
52 especially among patients and families. Included initiatives also lacked important contextual  
53 information, which is essential for replicating best practices and scaling up.

54 **Conclusions:** This scoping review identified a number of initiatives that have been implemented  
55 to target delayed discharges. While the majority of initiatives resulted in positive outcomes,



1  
2  
3 56 delayed discharges remain an international problem. There are significant gaps and limitations in  
4  
5 57 evidence and thus, future work is warranted to develop solutions that have a sustainable impact.  
6  
7

8 58 **Protocol Registration:** Open Science Framework (<https://osf.io/rfzgu>)  
9  
10

## 11 59 **Keywords**

12  
13

- 14 60 • Delayed discharge, alternate level of care, delayed transfer, best practices, scoping  
15  
16 61 review, hospitals, patient discharge, patient transfer, practice guidelines, literature review  
17  
18  
19

## 20 62 **Article summary: Strengths and limitations of this study**

21  
22

- 23 63 • To our knowledge, this is the first scoping review to identify best practices for delayed  
24  
25 64 discharges involving a hospital setting  
26  
27 65 • The Preferred Reporting Items for Systematic reviews and Meta-Analyses extension for  
28  
29 66 Scoping Reviews (PRISMA-ScR) Checklist was followed  
30  
31 67 • A comprehensive search of peer reviewed and grey literature was conducted  
32  
33  
34 68 • A critical appraisal of the interventions was not performed  
35  
36  
37  
38  
39  
40  
41  
42  
43  
44  
45  
46  
47  
48  
49  
50  
51  
52  
53  
54  
55  
56  
57  
58  
59  
60

## 69 Introduction

70 A delayed hospital discharge (known as alternate level of care (ALC) in Canada and  
71 delayed transfer of care in the United Kingdom) occurs when a patient is medically approved to  
72 be discharged, but remains in hospital for nonmedical reasons (e.g. waiting for a long-term care  
73 bed to become available or to transfer home with services).<sup>1</sup> While waiting for their next  
74 destination, patients' level of care and activation often decrease or stop entirely. Delayed  
75 discharge can result in hospital patient flow issues (e.g. emergency service backlogs, cancelled  
76 surgeries, delays in medically necessary care),<sup>2</sup> increased healthcare costs,<sup>3</sup> an increased risk of  
77 functional decline,<sup>4,5</sup> falls,<sup>6</sup> hospital related adverse events (e.g. medication error, exposure to  
78 infectious disease),<sup>6,7</sup> mortality,<sup>8</sup> as well as poor patient and family experiences.<sup>9</sup>

79 Patients who experience a delayed discharge in previous studies exhibited the following  
80 characteristics: female,<sup>10</sup> older,<sup>10,11</sup> physically or cognitively impaired,<sup>4,12-15</sup> aggressive  
81 behaviours,<sup>16</sup> use assistive devices,<sup>17</sup> psychiatric conditions,<sup>10</sup> neurologic disorders<sup>15</sup> and/or  
82 multimorbidity.<sup>17</sup> In addition to these patient-level factors, there are a number of system-level  
83 factors that contribute to delayed discharges, including long wait lists for long-term care  
84 facilities,<sup>5,17-19</sup> rehabilitation or other post-acute care (e.g. home care),<sup>11,12,20-23</sup> the lack of  
85 culturally and religiously diverse long-term care facilities,<sup>15</sup> limited or absent hospital services  
86 on weekends<sup>24</sup> and organizational delays (e.g. administrative delays, delayed assessments).<sup>24,25</sup>  
87 There are also different pressures and priorities across sectors, with little incentive to work  
88 together as a system. For example, while hospitals may be focused on efficiency and throughput,  
89 community-based organizations may be focused on empowerment, longer term quality of life  
90 outcomes and working at a pace that works for patients and families. The funding structure of  
91 hospitals and healthcare systems can also have an impact on overall patient flow, including

1  
2  
3 92 discharge delays. Although there is wide variation in funding structures within and across  
4  
5 93 countries, there is potential for funding to either incentivize or dis-incentivize timely hospital  
6  
7 94 discharges.<sup>26-30</sup>  
8  
9

10 95 The combination of patient and system-level factors contributing to delayed discharges  
11  
12 96 can also have a large financial impact on patients, families, healthcare providers and the  
13  
14 97 healthcare system.<sup>3</sup> A recent systematic review reported that delayed discharges cost  
15  
16 98 approximately £200-565 (320-900 CAD) per patient, per day.<sup>3</sup> Further, it was estimated that the  
17  
18 99 National Health Service (England) spends £820 million (1.3 billion CAD) every year on patients  
19  
20 100 who have a discharge delay.<sup>31</sup> Similarly, a recent report from Canada stated that three hospitals  
21  
22 101 located in Ottawa, Ontario, spend approximately 250,000 CAD per day (combined) on patients  
23  
24 102 occupying beds at a level of care they no longer require.<sup>32</sup> In addition to large costs for hospitals  
25  
26 103 and healthcare systems, delayed hospital discharges can result in out-of-pocket costs for patients  
27  
28 104 and families.<sup>33</sup> Increased out-of-pocket costs, in addition to the others uncertainties associated  
29  
30 105 with a delay, can heighten stress for patients and families, contribute to poor experiences and  
31  
32 106 compromise quality of life.<sup>9</sup>  
33  
34  
35  
36  
37

38 107 Overall, delayed hospital discharges are problematic internationally, highlighting a need  
39  
40 108 to identify best practices and current initiatives that are concentrating on solutions to this  
41  
42 109 complex problem. To date, the majority of published literature on delayed discharge has focused  
43  
44 110 on risk factors and characteristics of patients who experience delayed discharge. There has been  
45  
46 111 a limited focus on initiatives that address the delayed discharge problem. Therefore, the purpose  
47  
48 112 of this scoping review was to examine peer-reviewed and grey literature (literature published  
49  
50 113 through non-traditional means) for initiatives that have been developed and/or evaluated for  
51  
52 114 delayed discharge from a hospital setting, with the goal of identifying best practices for reducing  
53  
54  
55  
56  
57  
58  
59  
60

1  
2  
3 115 delayed discharge. A scoping review methodology was appropriate for addressing this goal, in  
4  
5 116 order to identify the types of available evidence on this topic, examine key characteristics  
6  
7  
8 117 relating to initiatives for delayed discharge and to identify knowledge gaps.<sup>34</sup>  
9

## 10 11 118 **Methods**

12  
13  
14 119 This review followed the scoping review methodology outlined by Levac and  
15  
16 120 colleagues,<sup>35</sup> as well as the recently developed PRISMA-ScR reporting guidelines for scoping  
17  
18 121 reviews (see Supplementary Table 1).<sup>36</sup> A protocol for this scoping review was developed in  
19  
20 122 consultation with a librarian at the University of Toronto, with continuous input from members  
21  
22  
23 123 of the research team. The registered protocol can be found on Open Science Framework  
24  
25 124 (<https://osf.io/rfzgu>).  
26  
27

### 28 29 125 **Stage 1: Identifying the research question**

30  
31 126 The research question developed to lead this scoping review was: *what is known in the*  
32  
33 127 *literature about initiatives (e.g. strategies, programs, interventions) that have been developed,*  
34  
35 128 *implemented, and/or evaluated for delayed discharge involving a hospital setting?* The two main  
36  
37 129 aims were: (1) to review what delayed discharge initiatives entail (e.g. characteristics, outcomes)  
38  
39 130 and (2) to identify gaps in the literature in order to inform future studies.  
40  
41  
42

### 43 44 131 **Stage 2: Identifying relevant articles**

45  
46 132 The search strategy was developed with a librarian at the University of Toronto and  
47  
48 133 through consultations with an advisory group and collaborators who have experience in clinical  
49  
50 134 practice or administration (see Supplementary Table 2 for Medline search strategy). Each search  
51  
52 135 strategy was adapted for the specific database using appropriate command line syntax and  
53  
54  
55 136 indexing. The following are examples of keywords searched using Boolean operators, proximity  
56  
57  
58  
59  
60

1  
2  
3 137 operators, wild cards and truncations: *alternate level of care, delayed discharge, delayed*  
4  
5 138 *transfer, bed blocking, strategy, model, intervention, program, policy.*  
6  
7

8 139 Electronic databases were searched for relevant articles. The following electronic  
9  
10 140 databases were searched on August 16, 2019: MEDLINE (Ovid Interface), EMBASE (Ovid  
11  
12 141 Interface), AMED (Ovid Interface), Cumulative Index to Nursing and Allied Health Literature  
13  
14 142 (EBSCO Interface) and Cochrane Library. Grey literature was searched on the following  
15  
16 143 databases and repositories: OpenGrey, Health Services Research Projects in Progress,  
17  
18 144 UpToDate, Community Research and Development Information Services and TSpace, as well as  
19  
20 145 on numerous national and international healthcare and government websites. We also reached  
21  
22 146 out to key stakeholders, including members of our advisory group, to send us relevant reports  
23  
24 147 and presentations.  
25  
26  
27  
28

### 29 148 **Stage 3: Study selection**

30  
31  
32 149 For inclusion, articles (peer-reviewed and grey literature) were required to meet the  
33  
34 150 following criteria: (1) focused on delayed discharge, (2) included an initiative to address delayed  
35  
36 151 discharge, (3) involved a hospital setting, (4) published between January 1, 2004 and August 16,  
37  
38 152 2019, and (5) peer-reviewed or grey literature. We focused our inclusion on initiatives involving  
39  
40 153 a hospital setting because this is where the problem of delayed discharges surfaces. Articles were  
41  
42 154 excluded if they met any one of the following criteria: (1) focused on changing the  
43  
44 155 threshold/timing of discharge (early discharge), (2) books, book chapters, opinion pieces or  
45  
46 156 editorials, (3) grey literature that did not sufficiently describe the initiative implemented (e.g.  
47  
48 157 implementation process, location, population, impact); (4) protocols, trial papers or chart  
49  
50 158 reviews, or (5) conference abstracts or articles without an accessible full-text. Articles were  
51  
52 159 excluded for criteria one (changing the threshold/timing of discharge) because the rationale for  
53  
54  
55  
56  
57  
58  
59  
60

1  
2  
3 160 having an earlier discharge was often focused on other factors such as cost-savings by reducing  
4  
5 161 length of stay, rather than specifically addressing a delayed discharge. Articles were excluded if  
6  
7 162 they met criteria two (books, book chapters, opinion pieces or editorial) to eliminate articles with  
8  
9 163 potential personal biases and summaries of peer-reviewed literature. Grey literature that did not  
10  
11 164 provide sufficient details on the initiative (such as lacking a description of the components of the  
12  
13 165 initiative) were excluded. Articles published more than 15 years ago, before January 1, 2004,  
14  
15 166 were excluded to ensure the initiatives included in this scoping review were relevant to more  
16  
17 167 current health service practices.  
18  
19  
20  
21

22 168 Articles identified from the database searches were imported into EndNote X9, a  
23  
24 169 reference management software, where they were de-duplicated following Bramer's method.<sup>37</sup>  
25  
26 170 The initial database searches identified 22,704 articles, which were reduced to 15,824 following  
27  
28 171 de-duplication (Figure 1). The titles and abstracts of the articles were reviewed on Covidence, a  
29  
30 172 software platform for systematic and scoping reviews.<sup>38</sup> The research team (LC, JL, KK, SJTG,  
31  
32 173 KMK, JK) independently screened the titles and abstracts of 40 articles to test their agreement.  
33  
34 174 The reviewers had a good percent agreement (85%), so the remaining articles were divided  
35  
36 175 amongst the team and screened by single reviewers (LC, KMK, JK). All disagreements were  
37  
38 176 discussed in-person by the reviewers until a consensus was reached; minor revisions were made  
39  
40 177 to the eligibility criteria to ensure clarity and consistency. Following title and abstract screening,  
41  
42 178 articles were reviewed at the full-text level. Thirty full-text articles were independently screened  
43  
44 179 by the research team (LC, KK, SJTG, KMK, JK, MA) to test their interrater agreement. The  
45  
46 180 remaining full-text articles (peer reviewed and grey literature) were double screened by four  
47  
48 181 reviewers (LC, KMK, JK, MA).  
49  
50  
51  
52  
53

54  
55 182 **Figure 1. PRISMA flow diagram of included articles [insert near here]**  
56  
57  
58  
59  
60

## 183 **Stage 4: Charting the data**

184 The data were charted by two reviewers (LC, KMK) using a data extraction form in  
185 Microsoft Excel. The form was developed and tested by the research team in a series of team  
186 meetings prior to the extraction of all data. We conducted spot checking of extracted data from  
187 15 percent of the included articles to ensure completeness and accuracy of the extracted data.  
188 Any questions that arose during the charting process were discussed by the team. Charted data  
189 contained the following information: general information, study characteristics, population  
190 characteristics, initiative characteristics, characteristics of delayed discharge, study outcomes and  
191 conclusions.

## 192 **Stage 5: Collating, summarizing and reporting results**

193 Microsoft Excel was used to conduct a descriptive quantitative analysis of the included  
194 articles, as well as facilitate qualitative thematic analysis. The thematic analysis of the charted  
195 data was an inductive and iterative process, in which the team (LC, SJTG, KMK, KK) met in-  
196 person to discuss high level concepts and identified common themes across the included articles.  
197 When reviewing the extracted data, we found that the strategies appeared to cluster into core  
198 categories, which aligned with a conceptual framework developed by Doern and Phidd.<sup>39</sup> This  
199 framework classifies policy instruments/tools along a continuum (from those that are least  
200 coercive like information sharing to those that are more coercive like public ownership or, in our  
201 case, new infrastructure). We deductively applied Doern and Phidd's categories to classify our  
202 findings, with some minor adaptations. The five adapted categories were not mutually exclusive  
203 and included: (1) information sharing (recommended initiatives and live information sharing);  
204 (2) tools and guidelines; (3) practice change; (4) infrastructure and finances and (5) other (see

205 Table 1 for category descriptions and examples). The categories assisted with the organization  
206 and presentation of the data.

## 207 **Stage 6: Consultation**

208 The research team presented findings of the scoping review to key stakeholders (e.g.  
209 hospital staff, patient and caregiver partners) through the planning process and analysis of  
210 results. These meetings were used to inform search terms, gather relevant documents,, obtain  
211 their feedback on the categorization/ organization of initiatives, as well as the identify knowledge  
212 gaps in order to develop targeted and actionable recommendations for future practice, policy and  
213 research.

## 214 **Patient and public involvement**

215 An Advisory Council (patient and caregiver partners), along with providers, managers  
216 and organizational leaders identified the lack of understanding about the state of evidence around  
217 best practices for delayed discharges, which informed the research question for this scoping  
218 review. The Advisory Council was involved with planning meetings where they provided  
219 feedback on the search terms and analysis. Results will be disseminated to the Advisory Council  
220 through presentations and a lay summary.

## 221 **Results**

### 222 **Study characteristics**

223 The database search identified 15,824 unique articles that were screened for eligibility;  
224 following title/ abstract and full-text review, 66 articles were included in this scoping review, 49



1  
2  
3 225 articles from the database searches and 17 articles from the grey literature searches (Figure 1).  
4  
5 226 The majority of included articles were quantitative studies (n=34), with a few qualitative (n=5),  
6  
7 227 mixed methods (n=6) or other designs (policy analyses, reviews, case studies and presentations;  
8  
9 228 n=21). There was a large variety of study designs, with few randomized trials and prospective  
10  
11 229 studies. Most initiatives were evaluated (n=42), with different types of evaluations such as  
12  
13 230 process evaluations and outcome evaluations. The United Kingdom (n=21), United States (n=18)  
14  
15 231 and Canada (n=17) were the most common countries where studies were conducted. Based on  
16  
17 232 the year of publication, there was a fairly even distribution of peer-reviewed articles across the  
18  
19 233 years of inclusion (from 2004 to 2019); however, the majority of grey literature was published in  
20  
21 234 the last 10 years. Table 2 describes the characteristics of included articles.  
22  
23  
24  
25  
26

27 235 The initiatives most commonly targeted adults and older adults; however, there were  
28  
29 236 some initiatives targeting the pediatric population. Specific characteristics of the study  
30  
31 237 population (i.e. age, sex, gender, ethnicity/race, income level, education, marital status,  
32  
33 238 household composition, employment status, comorbidities) were not reported in the majority of  
34  
35 239 articles. Most peer-reviewed articles (n=31) defined a delayed discharge; however, there was a  
36  
37 240 wide variety of definitions for these terms (see Supplementary Table 3). The most common  
38  
39 241 definition for delayed discharge was when a patient was identified as medically ready for  
40  
41 242 discharge, but remained in hospital. Table 3 describes the initiative characteristics.  
42  
43  
44  
45

46 243 Based on Doern and Phidd's adapted framework,<sup>39</sup> we categorized the included initiatives  
47  
48 244 as: information sharing (n=19); tools and guidelines (n=19); practice change (n=36);  
49  
50 245 infrastructure and finances (n=10); or other (n=3), which are described in detail below (see  
51  
52 246 Figure 2). Numerous articles used a combination of categories in their initiatives (e.g.  
53  
54 247 information sharing and practice change).  
55  
56  
57  
58  
59  
60

1  
2  
3 248 **Figure 2. Categories of initiatives for improving delayed hospital discharges [insert near**  
4  
5 249 **here]**

## 9 250 **Information sharing**

11 251 The information sharing category included initiatives that promoted communication,  
12  
13  
14 252 leadership from senior staff and information exchange within or across organizations.<sup>2,40-55</sup> The  
15  
16 253 majority of information sharing initiatives included team meetings and huddles to facilitate  
17  
18 254 communication through in-person interactions (between staff or staff and  
19  
20 255 patients/families).<sup>40,41,43,44,46</sup> Information sharing was promoted between multidisciplinary teams  
21  
22  
23 256 and patients to improve length of stay and continuity of care. For example, Adlington and  
24  
25 257 colleagues (2018) implemented Plan Do Study Act cycles during weekly quality improvement  
26  
27 258 meetings, in which driver diagrams (visual displays) were used to share information with the  
28  
29 259 multidisciplinary project team on issues affecting length of stay and hospital bed occupancy.<sup>40</sup>  
30  
31 260 This information was used to guide practice changes aimed at improving communication during  
32  
33 261 the discharge process (daily rounds, focusing on long-stay patients), bed management (nursing  
34  
35 262 support to prevent deterioration) and community services (email updates and involvement of care  
36  
37 263 coordinators). The majority of initiatives shared information though in-person communication;  
38  
39 264 however, some used technology. Caminiti and colleagues (2013) used technology-assisted  
40  
41 265 communication to develop reports and audits to motivate and hold physicians accountable,<sup>42</sup> as  
42  
43 266 in some health systems, physicians play a key role in designating patients as having a delayed  
44  
45 267 discharge. Profiles for each physician were created monthly using hospital administrative data  
46  
47 268 (containing length of stay, number of patient discharged that month). All information sharing  
48  
49 269 initiatives resulted in positive outcomes (e.g. reduced length of stay and a decrease in delayed  
50  
51 270 discharges).

## 271 **Tools and guidelines**

272 The tools and guidelines category included initiatives with actionable, concrete steps or  
273 processes in the form of tools, guidelines and models to inform practice.<sup>47-50,54-67</sup> Physicians and  
274 multidisciplinary teams (e.g. nurses, social workers, discharge planners) frequently implemented  
275 tool and guideline initiatives. A promising initiative within this category included the ALC  
276 Avoidance Framework, developed by Burr and colleagues (2017), with the goal of preventing  
277 ALC designations and reducing ALC rates.<sup>56,67</sup> This framework contains 12 leading practices,  
278 with specific strategies for organizational assessment. Some of the leading practices include:  
279 providing patients and substitute decision makers with an estimated date of discharge,  
280 identifying high-risk patients of becoming ALC and implementing escalation processes for the  
281 management of ALC challenges. Additional initiatives focused on improving patient flow  
282 through criteria-led discharges (discharging patients once a pre-determined set of criteria had  
283 been met) and critical pathways/ discharge guidelines.

284 The majority of initiatives categorized as tools and guidelines had positive results,<sup>47-49,54-  
285 60,62,64-66</sup> which included a reduction in hospital days and length of stay. However, one initiative,  
286 the Goal Length of Stay Tool, did not have positive outcomes on length of stay.<sup>50</sup> This initiative  
287 incorporated information sharing into a computer-based program to identify patients whose  
288 length of stay exceeded their benchmark figure. It had no change on length of stay and was  
289 perceived negatively by staff because they did not believe the benchmark figure was an accurate  
290 representation of a patient's current functional status and readiness for discharge.

## 291 **Practice changes**

292 This category included initiatives that altered how usual care was delivered.<sup>51-55,63-66,68-92</sup>  
293 Common practice change initiatives included hospital-based, nurse-led discharges and cross-  
294 sectoral transitional programs (e.g. Home First, Discharge to Assess, Hospital to Home). Most  
295 were implemented by nurses and multidisciplinary teams. Nurse and criteria-led discharges often  
296 involved a pre-determined list of criteria (clinical parameters) that a patient was required to meet  
297 in order to be discharged from hospital by a member of the discharge team. For example,  
298 Graham and colleagues (2012) conducted a retrospective study (N=128) to compare nurse-led  
299 and doctor-led discharge (standard discharge pathway) post laparoscopic surgery.<sup>74</sup> For nurse-led  
300 discharge, the patient had to meet 13 pre-established criteria (stable vital signs and comparable to  
301 baseline on admission; achieved optimal mobility; minimal nausea, vomiting and dizziness;  
302 adequate pain control; received written and verbal instructions about post-operative care, etc.).  
303 When compared to the doctor-led discharge group (n=64), patients in the nurse-led group (n=64)  
304 were significantly more likely to be discharged on the day of surgery and had a significantly  
305 smaller number of patients with no medical or social reason for delayed discharge.

306 Another unique example of a practice change initiative was the 7-Day Hospital Initiative  
307 implemented by Blecker and colleagues.<sup>70</sup> The purpose of this observational study was to  
308 evaluate the impact of increasing weekend staff (hospitalists, care managers, social workers) and  
309 services on length of stay, percent of patients discharged on weekends, 30-day readmission rate  
310 and in-hospital mortality rate. This multifaceted intervention resulted in a decreased average  
311 length of stay, an increased proportion of weekend discharges and no impact on readmission  
312 rates or mortality.

1  
2  
3 313 The majority of initiatives categorized as a practice change resulted in positive outcomes  
4  
5 314 on length of stay and rate of discharge delays. However, there were several initiatives that were  
6  
7 315 perceived negatively by patients,<sup>77</sup> or had no change<sup>68,75</sup> or a negative impact<sup>52</sup> on study  
8  
9 316 outcomes (increase in delayed discharges). Meehan and colleagues (2018) explored patient  
10  
11 317 experiences with a program (Discharge to Assess) that discharged patients who were clinically  
12  
13 318 ready but still required support, in order for their needs to be assessed in their own environment  
14  
15 319 (i.e. at home).<sup>77</sup> Negative experiences were described by participants (patients and caregivers)  
16  
17 320 who indicated feeling ignored, had poor communication with their healthcare providers and were  
18  
19 321 not involved in the decision-making process. Negative outcomes were also identified in Williams  
20  
21 322 and colleagues (2010) prospective cohort study.<sup>52</sup> This study evaluated the impact of a critical  
22  
23 323 care outreach role on delays in discharge and identified that discharge delays from the intensive  
24  
25 324 care unit increased over the study period with the implementation of this role. The authors  
26  
27 325 emphasized the importance of a multifaceted and collaborative approach (involving multiple  
28  
29 326 stakeholders/ team members), focusing on patient flow throughout the hospital in order to  
30  
31 327 address the numerous factors impacting delays.  
32  
33  
34  
35  
36  
37  
38

## 39 **Infrastructure and finances**

40  
41 329 The infrastructure and finance category included initiatives that involved tangible  
42  
43 330 structural or financial changes (e.g. building more long-term care beds to facilitate the transition  
44  
45 331 of patients out of hospital, financial penalties for remaining in hospital after being medically  
46  
47 332 ready for discharge).<sup>55,92-100</sup> The Community Care (Delayed Discharges) Act in the United  
48  
49 333 Kingdom was an initiative identified in multiple articles.<sup>93,96,97,100</sup> This initiative required local  
50  
51 334 authorities to make payments to acute hospitals when patients could not be discharged because  
52  
53 335 appropriate community care arrangements had not been made. Although this measure was not  
54  
55  
56  
57  
58  
59  
60

1  
2  
3 336 necessarily enforced, it created incentive for the hospital and community to work together more  
4  
5 337 collaboratively. Additionally, transitional care units<sup>94,95</sup> and discharge funds<sup>98,99</sup> were common  
6  
7 338 initiatives implemented to address delayed discharges among elderly patients. Transitional care  
8  
9  
10 339 units focused on rehabilitation to promote recovery and the regaining of independence, while  
11  
12 340 discharge funds paid for services that were preventing the patient from being discharged or  
13  
14 341 returning home (e.g. medical equipment, medications, transportation, home repairs). All  
15  
16 342 initiatives categorized as infrastructure and finances had positive results on study outcomes,  
17  
18  
19 343 including reductions in discharge delays, length of stay and cost.<sup>93-98</sup>  
20  
21

## 22 344 **Other initiatives**

23  
24  
25 345 The other initiatives category included statistical and predictive modeling of initiatives to  
26  
27 346 improve delayed discharges.<sup>101-103</sup> These models explored the impact of increasing the supply of  
28  
29 347 nursing home beds,<sup>101</sup> potential care pathways for the elderly and reimbursement costs<sup>102</sup> and  
30  
31 348 discharge strategies to reduce hospital occupancy.<sup>103</sup> Gaughan and colleagues' (2012) modelling  
32  
33 349 and empirical analysis identified that increasing the supply of long-term care beds can decrease  
34  
35 350 delayed discharges caused by a lack of social care.<sup>101</sup> Their models further emphasized the  
36  
37 351 importance of communication between hospitals and the long-term care sector to reduce social  
38  
39 352 care delayed discharges. Similarly, Katasaliaki et al. (2005) used discrete-event simulations to  
40  
41 353 determine care pathways and associated costs, in which they identified that adding new beds in  
42  
43 354 hospital or Intermediate Care could reduce delay times.<sup>102</sup>  
44  
45  
46  
47  
48

## 49 355 **Recommended initiatives – Calls to action**

50  
51  
52 356 Several articles were not evaluations but reports or reviews consisting of recommended  
53  
54 357 initiatives to address delayed hospital discharges, which often combined a number of the  
55  
56  
57  
58  
59  
60

1  
2  
3 358 categories illustrated above.<sup>2,45,92,104</sup> Sutherland and Crump (2013) outlined three key solutions  
4  
5 359 for improving delayed discharges in Canada: building more acute and post-acute care beds,  
6  
7 360 increasing integrated care and creating financial incentives to improve the quality, quantity and  
8  
9 361 effectiveness of healthcare.<sup>45</sup> The authors discussed challenges and limitations to implementing  
10  
11 362 each of these options and emphasized that a potential solution to addressing delayed discharges  
12  
13 363 was to combine the three strategies. Another Canadian report developed recommendations for  
14  
15 364 providing care to the aging population and those experiencing a delayed discharge.<sup>2</sup> Walker  
16  
17 365 (2011) outlined recommendations for improving primary care, the care continuum and senior  
18  
19 366 friendly acute care, responding to special needs populations (e.g. persons with mental health  
20  
21 367 concerns, addiction and neurological conditions, on dialysis or ventilators), and implementing an  
22  
23 368 “Assess and Restore” model (a program to help patients maintain or regain functional  
24  
25 369 independence, transition to home, and remain in the community for as long as possible).

30  
31 370 The NHS Improvement (United Kingdom) also released a guide in 2019 on reducing long  
32  
33 371 hospital stays.<sup>104</sup> This guide contained several recommendations for tackling delayed discharges  
34  
35 372 including: a patient flow bundle (a tool to reduce delays for patients on inpatient wards),  
36  
37 373 Red2Green Days (a visual tool to reduce unnecessary waiting by patients by supporting the  
38  
39 374 rounding process), long-stay patient reviews (weekly reviews of long-stay patients (>20 days), to  
40  
41 375 help tackle obstacles that are delaying discharge) and multiagency discharge events (review of  
42  
43 376 individual patient journeys by bringing together senior staff from the local health and social care  
44  
45 377 system).

## 378 **Discussion**

379           The purpose of this scoping review was to identify best practices for reducing delayed  
380 discharges, examine the characteristics of identified initiatives and develop recommendations for  
381 future work. Based on the 66 included articles, our findings showed that: (1) initiatives are  
382 focused on quantitative outcomes, with limited assessment of the impact on patient, caregiver  
383 and provider experiences; (2) the sustainability of initiatives overtime is not measured and (3)  
384 there is a lack of important contextual information reported (e.g. population characteristics,  
385 setting, implementation processes); and (4) there are inconsistencies in how delayed discharges  
386 are defined.

387           This review highlighted where the majority of efforts around addressing delayed  
388 discharges have been placed. Practice change was the most common categorization of initiatives  
389 (n=36), followed by information sharing (n=19) and infrastructure and finance (n=19). All  
390 initiatives categorized as information sharing and infrastructure and finance reported positive  
391 outcomes. Despite reporting positive outcomes, many information sharing initiatives promoted  
392 communication between staff, with a limited number targeting communication with patients and  
393 families. Additionally, there were more initiatives implemented in a single sector (e.g. in  
394 hospital) in comparison to cross-sectoral initiatives (e.g. hospital and home care).

395           Length of stay was the most common outcome measured in this scoping review, with a  
396 limited number of articles exploring patient, caregiver and provider experiences. For example,  
397 could it be considered a success if an initiative does not result in a reduced length of stay, but  
398 allows patients to obtain broader goals related to their care (i.e. being able to return home) or  
399 enhance their care experience? Qualitative methods, including the capturing of patient, caregiver  
400 and provider experiences, would allow for a deeper exploration and understanding of success



1  
2  
3 401 from the perspectives of different stakeholders involved in the initiative.<sup>105-107</sup> Experiential  
4  
5 402 evidence on whether an intervention is working is required. As noted in our review, a tool  
6  
7 403 developed to better understand delayed discharge was deemed irrelevant by care providers who  
8  
9 404 felt that the tool captured the wrong information.<sup>50</sup> Therefore, capturing providers' experiences  
10  
11 405 and perspectives are essential in understanding effectiveness of strategies as well as uptake. Most  
12  
13 406 articles included in this scoping review used a quantitative study design, with limited articles  
14  
15 407 using a mixed methods or qualitative approach; thus highlighting a key focus for future research.  
16  
17  
18  
19

20 408       The majority of initiatives had an intervention or follow-up period of one year, but this  
21  
22 409 ranged from four months to three years. Based on the limited number initiatives with a follow-up  
23  
24 410 period of longer than one year (n=8), there is a need for more formal evaluations with longer  
25  
26 411 follow-up periods to measure the sustainability of initiatives over time. For example, Shelton and  
27  
28 412 colleagues' Integrated Sustainability Framework consists of five categories of factors associated  
29  
30 413 with the sustainability of interventions across different contexts and settings: outer context (e.g.  
31  
32 414 policies, leadership, funding), inner context (e.g. culture, mission, funding), intervention  
33  
34 415 characteristics (e.g. cost, adaptability, benefit), processes (e.g. partnership, training/support,  
35  
36 416 planning, capacity building) and implementer and population characteristics (e.g. implementation  
37  
38 417 skills/expertise, attitudes/motivation).<sup>108</sup> Shelton et al. recommended prospective, multi-level and  
39  
40 418 mixed methods study designs for studying the impact and sustainability of interventions. Overall,  
41  
42 419 the initiatives included in this scoping review had positive short-term impacts, but it is unclear if  
43  
44 420 these outcomes are maintained over time. This emphasizes the need to design and implement  
45  
46 421 interventions with sustainability in mind.  
47  
48  
49  
50  
51

52 422       The majority of categories of initiatives resulted in positive outcomes; however,  
53  
54 423 initiatives classified as practice change had the most mixed outcomes (positive, negative and no  
55  
56  
57  
58  
59  
60

1  
2  
3 424 change). Practice changes often require a greater number of resources and are more complex to  
4  
5 425 implement than static solutions (i.e. hosting daily rounds, developing a framework, etc.). A  
6  
7  
8 426 recent systematic review (2018) conducted by Geerligs and colleagues identified implementation  
9  
10 427 barriers and facilitators of patient-focused, in-hospital interventions,<sup>109</sup> highlighting the complex  
11  
12 428 interplay of factors that can impact implementation. Three domains, with the potential to impact  
13  
14 429 the implementation process, were identified: system (environmental context, culture,  
15  
16 430 communication processes and external requirements), staff (commitment and attitudes,  
17  
18 431 understanding and awareness, role identity and skills, ability and confidence) and intervention  
19  
20 432 (ease of integration, face validity, safety and legality and supportive components). Thus, it is  
21  
22 433 important for interventions to be nimble and adaptable to support the changing need of patients,  
23  
24 434 caregivers, providers, organizations and policy contexts over time.  
25  
26  
27  
28

29 435 It was also unclear if some initiatives moved problems from one sector to another. For  
30  
31 436 example, adding more intermediate care beds may alleviate pressures in acute care in the short-  
32  
33 437 term but eventually also be at full capacity if community resources are not available. The 7-day  
34  
35 438 hospital discharge initiative highlighted in this review, improved hospital throughput but had no  
36  
37 439 impact on re-admissions,<sup>70</sup> suggesting that thinking beyond one sector is required. It is  
38  
39 440 encouraging that most practice change initiatives resulted in improved outcomes, but more  
40  
41 441 clarity is needed to understand what the trade-offs were, as well as how to scale-up the  
42  
43 442 successful initiatives.  
44  
45  
46  
47

48 443 Health systems also need to consider their broader goals around delayed hospital  
49  
50 444 discharge - should it only be about reducing delays or should we place an equal focus on  
51  
52 445 optimizing patient and caregiver experiences and outcomes? The health system context,  
53  
54 446 including the funding environment, will ultimately shape what interventions get implemented  
55  
56  
57  
58  
59  
60

1  
2  
3 447 and how they are sustained over time. Some interventions may be considered low value in some  
4  
5 448 countries and contexts and high value in others. Additionally, certain initiatives may be more  
6  
7 449 effective in different environments, as variations in the number of hospital and long-term care  
8  
9 450 beds per capita, infrastructure financing and degree of integration across sectors may impact the  
10  
11 451 outcomes of an initiative. Future research needs to better understand why some strategies may  
12  
13 452 thrive in some environments and not others.  
14  
15

16  
17 453 Another key finding identified in the scoping review was the lack of information and  
18  
19 454 details on the implementation strategy (how strategies were implemented, over what time period,  
20  
21 455 how implementation challenges were dealt with), setting (where was it implemented) and  
22  
23 456 population characteristics (who was it implemented for). The implementation of initiatives can  
24  
25 457 be impacted by differences in healthcare system structure and funding. Further, this contextual  
26  
27 458 information is essential for both understanding outcomes, scaling-up and sustainability of  
28  
29 459 interventions because it is not only important to know if the intervention was effective, but also  
30  
31 460 for whom and in what context it was effective.<sup>110,111</sup>  
32  
33  
34  
35

36 461 Finally, this review highlighted a lack of consistency in how delayed discharge is  
37  
38 462 defined, both within and across countries. While there was one definition that was used more  
39  
40 463 frequently (a patient was identified as medically ready/fit for discharge, but remained in  
41  
42 464 hospital), there can be different interpretations of when a patient is considered “medically fit”  
43  
44 465 and who makes this decision. Inconsistent definitions can lead to variations in the reported rates  
45  
46 466 of delayed discharge, which can further impact the perceived applicability and effectiveness of  
47  
48 467 an intervention. Our finding was echoed in a narrative review conducted by Glasby and  
49  
50 468 colleagues (2004), who further explained the challenges differing definitions create when  
51  
52  
53  
54  
55  
56  
57  
58  
59  
60

1  
2  
3 469 attempting to compare findings.<sup>112</sup> In order to mitigate these challenges, it is critical to be more  
4  
5 470 consistent around how delayed discharges are defined.  
6  
7

## 8 471 **Future work**

10  
11 472 From this review, we have identified areas for future research. First, patient, family and  
12  
13 473 provider needs and experiences should be explored during the development and implementation  
14  
15 474 of initiatives aimed at improving delayed discharges. Patients and family engagement is both  
16  
17 475 important and recommended by healthcare and government organizations; however, they are  
18  
19 476 often excluded in the development and write-up of best practice guidelines.<sup>113</sup> Second, evaluation  
20  
21 477 studies that track outcomes over a longer period of time should be conducted to study the  
22  
23 478 sustainability of initiatives over time, how they are adapted (developmental evaluations), as well  
24  
25 479 as their impact on other sectors (e.g. primary and community care). Third, initiatives should be  
26  
27 480 implemented and integrated across sectors (hospital, primary care and home and community  
28  
29 481 care) to help get at the root of the problem and ensure the implementation of an initiative in one  
30  
31 482 setting does not simply shift the problem to another. Fourth, a review should be conducted to  
32  
33 483 assess the state of knowledge around initiatives that are more upstream in nature (e.g. hospital  
34  
35 484 admission avoidance, emergency department diversion and delivery models that proactively  
36  
37 485 address the health and social care needs of individuals in community settings). Finally, there is  
38  
39 486 an opportunity for future research to consider a realist review of the literature on delayed hospital  
40  
41 487 discharge to understand the context, mechanisms of impact, outcomes and theories of change,  
42  
43 488 given that addressing a delayed discharge is a complex problem. As a first step we sought to  
44  
45 489 include interventions that included hospitals, and this revealed a single sector and reactive  
46  
47 490 approach to addressing delayed discharge.  
48  
49  
50  
51  
52  
53  
54  
55  
56  
57  
58  
59  
60

## 491 **Limitations**

492           There are a few limitations of this review that should be noted. It is possible that some  
493 relevant articles were missed because the search was limited from January 1, 2004 and August  
494 16, 2019 and conducted in English. Our search strategy was comprehensive and we conducted an  
495 in-depth search of grey literature to minimize the potential of missed articles. While we did not  
496 limit the inclusion of articles to the English language, our search strategy was in English, so there  
497 is a possibility that articles published in different languages were not identified. We excluded  
498 studies that changed the threshold/timing of discharge (early discharge), as they often focused on  
499 cost-savings. We acknowledge that some of these initiatives may have transferable lessons to  
500 address discharge delays, and thus, note their exclusion as a potential limitation of this review.  
501 Although it is not a requirement for scoping reviews,<sup>36</sup> the interventions in this review were not  
502 critically appraised and thus, we cannot make recommendations on which interventions should  
503 be scaled up. Given concerns with regression toward the mean, especially for quality  
504 improvement projects, any positive results need to be interpreted with caution. Health systems  
505 are complex, evolving environments, where various iterations of strategies are regularly  
506 implemented, but not necessarily formally reported or published. Future work by our team will  
507 include a process evaluation on how strategies are actually implemented in different health  
508 system contexts, as well as why they work or do not work.

## 509 **Ethical Considerations**

510           There are a few ethical concerns associated with scoping reviews to be noted. These  
511 concern include authorship, transparency and plagiarism. All authors met the International  
512 Committee of Medical Journal Editors' recommended criteria for authorship and author order

1  
2  
3 513 was based on overall contribution to the review. We clearly outlined our methods at each stage  
4  
5 514 of the scoping review to ensure transparency and replicability. We also acknowledged  
6  
7 515 individuals who contributed to the review, but who did not warrant authorship. Lastly, when  
8  
9  
10 516 reporting the results of individual studies, we wrote them in our own words and cited  
11  
12 517 appropriately to avoid plagiarism.  
13  
14

## 15 16 518 **Conclusions**

17  
18  
19 519 This scoping review identified a variety of initiatives addressing delayed discharges  
20  
21 520 across five categories: information sharing, tools and guidelines, practice change, infrastructure  
22  
23 521 and finance and other. The majority of initiatives were focused on practice changes and many  
24  
25 522 incorporated more than one category. Initiatives were often implemented in a single sector,  
26  
27 523 rather than across sectors. It appears that many strategies implemented in hospitals including  
28  
29  
30 524 communication huddles, nurse-led discharges, home first programs and building more  
31  
32 525 infrastructure had positive short-term impacts. Many initiatives that led to positive outcomes  
33  
34 526 were implemented by a multidisciplinary team and included a number of components (e.g.  
35  
36 527 monthly reports and education). The success of these initiatives is based on a service-led  
37  
38 528 definition of success (effective use of hospital resources), rather than success from the patient  
39  
40 529 and family perspective. This highlights the need to shift to a more patient-centred approach that  
41  
42 530 focuses on improving outcomes and experiences, rather than system and hospital outcomes (i.e.  
43  
44 531 length of stay and hospital occupancy) alone. Despite the number of unique initiatives aimed at  
45  
46 532 addressing delayed discharges, current strategies may not be getting at the root of the problem  
47  
48 533 (initiatives/ intervention prior to hospital admission) and there is a need for solutions to this  
49  
50  
51 534 problem that have a long-term and sustainable impact.  
52  
53  
54  
55  
56  
57  
58  
59  
60

## 535 **Acknowledgments**

536 The authors would like to thank the University of Toronto librarian for their contribution  
537 to the search strategy, as well as Juliane Koropeski (JK) and Maliha Asif (MA) for the help  
538 screening articles. We would like to thank the involvement of our stakeholders who provided  
539 feedback on our search terms and sent us grey literature. Lastly, we would like to thank our  
540 Alternate Level of Care Advisory Council and Ida McLaughlin (chair of council) for their  
541 continual support and feedback on this program of work.

## 542 **Funding**

543 This work was supported by the Canadian Institutes of Health Research- Transitions in  
544 Care Strategic Funding Initiative on Best and Wise Practices (Grant #163064). Dr. Kerry  
545 Kuluski holds the Dr. Mathias Gysler Research Chair in Patient and Family Centred Care. Dr.  
546 Sara Guilcher is funded by the Canadian Institutes of Health Research Embedded Scientist  
547 Salary Award on Transitions in Care working with Ontario Health (Quality); the award also  
548 supported staff to assist with screening.

## 549 **Competing interests**

550 The authors have no conflicts of interests to declare.

## 551 **Author contributions**

552 KK, SJTG, JMS, JG and TK were responsible for the conception and design of the study,  
553 as well as acquisition of funding for the study. LC, SJTG, KMK and KK led the screening of  
554 articles and the analysis and interpretation of data, but all authors contributed to the analysis and

1  
2  
3 555 interpretation. Drafts of the manuscript were reviewed and revised by all authors. All of the  
4  
5 556 authors read and approved the final manuscript.  
6  
7

## 8 9 557 **Data Availability**

10  
11  
12 558 All data relevant to the study are included in the article or uploaded as supplementary  
13  
14 559 information.  
15  
16

17 560 **Word count:** 5,650  
18  
19  
20  
21  
22  
23  
24  
25  
26  
27  
28  
29  
30  
31  
32  
33  
34  
35  
36  
37  
38  
39  
40  
41  
42  
43  
44  
45  
46  
47  
48  
49  
50  
51  
52  
53  
54  
55  
56  
57  
58  
59  
60



## 561 References

- 562 1. Bate A. Delayed transfers of care in the NHS, 2017:1-20.
- 563 2. Walker D. Caring For Our Aging Population and Addressing Alternate Level of Care: Report  
564 Submitted to the Minister of Health and Long-Term Care. Canada, 2011.
- 565 3. Rojas-García A, Turner S, Pizzo E, et al. Impact and experiences of delayed discharge: A  
566 mixed-studies systematic review. *Health Expect* 2018;21(1):41-56. doi:  
567 10.1111/hex.12619 [published Online First: 2017/09/12]
- 568 4. Barnable A, Welsh D, Lundrigan E, et al. Analysis of the Influencing Factors Associated With  
569 Being Designated Alternate Level of Care. *Home Health Care Manag Pract*  
570 2015;27(1):3-12. doi: 10.1177/1084822314539164
- 571 5. McCloskey R, Jarrett P, Stewart C, et al. Alternate level of care patients in hospitals: what  
572 does dementia have to do with this? *Canadian geriatrics journal : CGJ* 2014;17(3):88-  
573 94. doi: 10.5770/cgj.17.106
- 574 6. Walker H, Langton D, Thomson L. 'New to Forensic'; implementing a problem-based  
575 introductory educational programme for forensic practitioners in Scotland. *J Psychiatr*  
576 *Ment Health Nurs* 2011;18(10):934-42. doi: 10.1111/j.1365-2850.2011.01778.x
- 577 7. Jasinarachchi KH, Ibrahim IR, Keegan BC, et al. Delayed transfer of care from NHS  
578 secondary care to primary care in England: its determinants, effect on hospital bed days,  
579 prevalence of acute medical conditions and deaths during delay, in older adults aged 65  
580 years and over. *BMC Geriatr* 2009;9:4-4. doi: 10.1186/1471-2318-9-4
- 581 8. Rosman M, Rachminov O, Segal O, et al. Prolonged patients' In-Hospital Waiting Period after  
582 discharge eligibility is associated with increased risk of infection, morbidity and  
583 mortality: a retrospective cohort analysis. *BMC Health Serv Res* 2015;15:246-46. doi:  
584 10.1186/s12913-015-0929-6
- 585 9. Overall AC, Guilcher S, Cadel L, et al. Patient and caregiver experience with delayed  
586 discharge from a hospital setting: A scoping review. *Health Expect* 2019;22(5):863-73.  
587 doi: 10.1111/hex.12916
- 588 10. Amy C, Zagorski B, Chan V, et al. Acute care alternate-level-of-care days due to delayed  
589 discharge for traumatic and non-traumatic brain injuries. *Healthcare policy = Politiques*  
590 *de sante* 2012;7(4):41-55.
- 591 11. Hwabejire JO, Kaafarani HA, Imam AM, et al. Excessively long hospital stays after trauma  
592 are not related to the severity of illness: Let's aim to the right target! *JAMA Surgery*  
593 2013;148(10):956-61. doi: 10.1001/jamasurg.2013.2148

- 1  
2  
3 594 12. Challis D, Hughes J, Xie C, et al. An examination of factors influencing delayed discharge of  
4 595 older people from hospital. *Int J Geriatr Psychiatry* 2014;29(2):160-68. doi:  
5 596 10.1002/gps.3983  
6  
7  
8 597 13. Costa AP, Hirdes JP. Clinical Characteristics and Service Needs of Alternate-Level-of-Care  
9 598 Patients Waiting for Long-Term Care in Ontario Hospitals. *Healthcare policy =*  
10 599 *Politiques de sante* 2010;6(1):32-46.  
11  
12 600 14. Costa AP, Poss JW, Peirce T, et al. Acute care inpatients with long-term delayed-discharge:  
13 601 evidence from a Canadian health region. *BMC Health Serv Res* 2012;12(1):172. doi:  
14 602 10.1186/1472-6963-12-172  
15  
16 603 15. Kozyrskyi A, De Coster C, St John P. Long stay patients in Winnipeg acute care hospitals.  
17 604 *Healthc Manage Forum* 2002;Suppl:15-20.  
18  
19  
20 605 16. Di Lorenzo R, Formicola V, Carra E, et al. Risk factors for long-stay in an Italian acute  
21 606 psychiatric ward: a 7-year retrospective analysis. *J Nurs Educ* 2013;4(1):p68. doi:  
22 607 <https://doi.org/10.5430/jnep.v4n1p68>  
23  
24 608 17. Rogers A, Clark EH, Rittenhouse K, et al. Breaking down the barriers! Factors contributing  
25 609 to barrier days in a mature trauma center. *J Trauma Acute Care Surg* 2014;76(1):191-95.  
26 610 doi: 10.1097/TA.0b013e3182aa3d5f  
27  
28  
29 611 18. Mitchell F. Hospital Discharge: A Descriptive Study of the Patient Journey for Frail Older  
30 612 People with Complex Needs. *J Integr Care* 2010;18(3):30-36. doi: 10.5042/jic.2010.0247  
31  
32 613 19. Tan WS, Chong WF, Chua KS, et al. Factors associated with delayed discharges after  
33 614 inpatient stroke rehabilitation in Singapore. *Annals of the Academy of Medicine,*  
34 615 *Singapore* 2010;39(6):435-41. [published Online First: 2010/07/14]  
35  
36 616 20. Landeiro F, Leal J, Gray AM. The impact of social isolation on delayed hospital discharges  
37 617 of older hip fracture patients and associated costs. *Osteoporos Int* 2016;27(2):737-45.  
38 618 doi: 10.1007/s00198-015-3293-9 [published Online First: 2015/09/05]  
39  
40  
41 619 21. Poulos CJ, Magee C, Bashford G, et al. Determining level of care appropriateness in the  
42 620 patient journey from acute care to rehabilitation. *BMC Health Serv Res* 2011;11:291-91.  
43 621 doi: 10.1186/1472-6963-11-291  
44  
45 622 22. Zeitz KM, Carter L, Robinson C. The ebbs and flows of changing acute bed capacity delays.  
46 623 *Aust Health Rev* 2013;37(1):66-9. doi: 10.1071/ah11077 [published Online First:  
47 624 2012/12/04]  
48  
49  
50 625 23. Anderson ME, Glasheen JJ, Anoff D, et al. Understanding predictors of prolonged  
51 626 hospitalizations among general medicine patients: A guide and preliminary analysis. *J*  
52 627 *Hosp Med* 2015;10(9):623-6. doi: 10.1002/jhm.2414 [published Online First:  
53 628 2015/07/02]  
54  
55  
56  
57  
58  
59

- 1  
2  
3 629 24. Hendy P, Patel JH, Kordbacheh T, et al. In-depth analysis of delays to patient discharge: a  
4 630 metropolitan teaching hospital experience. *Clin Med (Lond)* 2012;12(4):320-3. doi:  
5 631 10.7861/clinmedicine.12-4-320 [published Online First: 2012/08/31]  
6  
7  
8 632 25. Salonga-Reyes A, Scott IA. Stranded: causes and effects of discharge delays involving non-  
9 633 acute in-patients requiring maintenance care in a tertiary hospital general medicine  
10 634 service. *Aust Health Rev* 2017;41(1):54-62. doi: 10.1071/ah15204 [published Online  
11 635 First: 2016/03/31]  
12  
13 636 26. Sutherland JM, Repin N, Crump RT, et al. Paying for Hospital Services: A Hard Look at the  
14 637 Options. Toronto, Canada: CD Howe Institute, 2013:1-32.  
15  
16 638 27. Sutherland J. Hospital payment policy in Canada: Options for the future: Canadian Health  
17 639 Services Research Foundation, 2011.  
18  
19 640 28. Ontario Ministry of Health and Long-Term Care. Quality-Based Procedures Indicators: An  
20 641 Implementation Guidance Document. Ontario, Canada, 2014:1-38.  
21  
22 642 29. David G, Polsky D. Home Health Services, Economics of. In: Culyer AJ, ed. Encyclopedia  
23 643 of Health Economics. San Diego: Elsevier 2014:477-83.  
24  
25 644 30. HM Treasury. Spring Budget 2017. United Kingdom, 2017.  
26  
27 645 31. Knowles G, Burke MR, Carr M, et al. Independent Expert Review of Delayed Discharges:  
28 646 Department of Health, 2018.  
29  
30 647 32. Fagan L. 'Bed blockers' costing Ottawa hospitals millions. Glut of patients awaiting more  
31 648 appropriate care a 'crisis,' health workers say. Ottawa: CBC News, 2019.  
32  
33 649 33. McCloskey R, Jarrett P, Stewart C. The Untold Story of Being Designated an Alternate Level  
34 650 of Care Patient. *Healthcare policy = Politiques de sante* 2015;11(1):76-89.  
35  
36 651 34. Munn Z, Peters MDJ, Stern C, et al. Systematic review or scoping review? Guidance for  
37 652 authors when choosing between a systematic or scoping review approach. *BMC Med Res*  
38 653 *Methodol* 2018;18(1):143. doi: 10.1186/s12874-018-0611-x  
39  
40 654 35. Levac D, Colquhoun H, O'Brien KK. Scoping studies: advancing the methodology.  
41 655 *Implementation Science* 2010;5(1):69. doi: 10.1186/1748-5908-5-69  
42  
43 656 36. Tricco AC, Lillie E, Zarin W, et al. PRISMA Extension for Scoping Reviews (PRISMA-  
44 657 ScR): Checklist and ExplanationThe PRISMA-ScR Statement. *Ann Intern Med*  
45 658 2018;169(7):467-73. doi: 10.7326/M18-0850  
46  
47 659 37. Bramer WM, Giustini D, de Jonge GB, et al. De-duplication of database search results for  
48 660 systematic reviews in EndNote. *J Med Libr Assoc* 2016;104(3):240-43. doi:  
49 661 10.3163/1536-5050.104.3.014  
50  
51  
52  
53  
54  
55  
56  
57  
58  
59  
60

- 1  
2  
3 662 38. Babineau J. Product review: Covidence (systematic review software). *JCHLA / JABSC*  
4 663 2014;35(2):68-71. doi: <https://doi.org/10.5596/c14-016>  
5  
6 664 39. Hosseus D, Pal LA. Anatomy of a Policy Area: The Case of Shipping. *Can Public Policy*  
7 665 1997;23(4):399-415. doi: 10.2307/3552071  
8  
9 666 40. Adlington K, Brown J, Ralph L, et al. Better care: reducing length of stay and bed occupancy  
10 667 on an older adult psychiatric ward. *BMJ Open Qual* 2018;7(4):e000149. doi:  
11 668 <https://dx.doi.org/10.1136/bmj-oq-2017-000149>  
12  
13  
14 669 41. Boyd SS. Hospital Administrators' Strategies for Reducing Delayed Hospital Discharges and  
15 670 Improving Profitability. *Walden Dissertations and Doctoral Studies* 2017:1-1.  
16  
17 671 42. Caminiti C, Meschi T, Braglia L, et al. Reducing unnecessary hospital days to improve  
18 672 quality of care through physician accountability: a cluster randomised trial. *BMC Health*  
19 673 *Serv Res* 2013;13(1):14-14. doi: 10.1186/1472-6963-13-14  
20  
21  
22 674 43. Patel H, Yirdaw E, Yu A, et al. Improving Early Discharge Using a Team-Based Structure  
23 675 for Discharge Multidisciplinary Rounds. *Prof Case Manag* 2019;24(2):83-89. doi:  
24 676 <http://dx.doi.org/10.1097/NCM.0000000000000318>  
25  
26 677 44. Pirani SSA. Prevention of delay in the patient discharge process: an emphasis on nurses' role.  
27 678 *Journal for Nurses in Staff Development* 2010;26(4):E1-5. doi:  
28 679 10.1097/NND.0b013e3181b1ba74  
29  
30  
31 680 45. Sutherland JM, Crump RT. Alternative Level of Care: Canada's Hospital Beds, the Evidence  
32 681 and Options. *Healthcare policy = Politiques de sante* 2013;9(1):26-34.  
33  
34 682 46. Anonymous. Patient flow initiatives decrease LOS, up capacity. *Hosp Case Manag*  
35 683 2010;18(8):117-24.  
36  
37 684 47. Brankline AL, Coyle CM, Jencks KA, et al. Practical innovations: technology-assisted  
38 685 referrals. *Soc Work Health Care* 2009;48(8):768-76. doi: 10.1080/00981380902958213  
39  
40  
41 686 48. Henwood M. Effective partnership working: A case study of hospital discharge. *Health Soc*  
42 687 *Care Community* 2006;14(5):400-07. doi: [http://dx.doi.org/10.1111/j.1365-](http://dx.doi.org/10.1111/j.1365-2524.2006.00651.x)  
43 688 [2524.2006.00651.x](http://dx.doi.org/10.1111/j.1365-2524.2006.00651.x)  
44  
45 689 49. Maloney CG, Wolfe D, Gesteland PH, et al. A tool for improving patient discharge process  
46 690 and hospital communication practices: the "Patient Tracker". *AMIA Annu Symp Proc*  
47 691 2007:493-97.  
48  
49  
50 692 50. Roberts K, Stiller K, Harling R, et al. Impacts and perceptions of a computer-based length of  
51 693 stay benchmarking program. *Int J Ther Rehabil* 2013;20(5):237-45. doi:  
52 694 <https://doi.org/10.12968/ijtr.2013.20.5.237>  
53  
54  
55  
56  
57  
58  
59

- 1  
2  
3 695 51. Sobotka SA, Agrawal RK, Msall ME. Prolonged Hospital Discharge for Children with  
4 696 Technology Dependency: A Source of Health Care Disparities. *Pediatr Ann*  
5 697 2017;46(10):e365-e70. doi: 10.3928/19382359-20170919-01  
6  
7 698 52. Williams TA, Leslie GD, Brearley L, et al. Discharge delay, room for improvement? *Aust*  
8 699 *Crit Care* 2010;23(3):141-49. doi: 10.1016/j.aucc.2010.02.003  
9  
10  
11 700 53. Younis J, Salerno G, Fanto D, et al. Focused preoperative patient stoma education, prior to  
12 701 ileostomy formation after anterior resection, contributes to a reduction in delayed  
13 702 discharge within the enhanced recovery programme. *Int J Colorectal Dis* 2011:1-5. doi:  
14 703 <http://dx.doi.org/10.1007/s00384-011-1252-2>  
15  
16 704 54. Chidwick P, Oliver J, Ball D, et al. Six Change Ideas that Significantly Minimize Alternate  
17 705 Level of Care (ALC) Days in Acute Care Hospitals. *Healthc Q* 2017;20(2):37-43. doi:  
18 706 10.12927/hcq.2017.25226  
19  
20  
21 707 55. Baumann M, Evans S, Perkins M, et al. Organisation and features of hospital, intermediate  
22 708 care and social services in English sites with low rates of delayed discharge. *Health Soc*  
23 709 *Care Community* 2007;15(4):295-305. doi: 10.1111/j.1365-2524.2007.00697.x  
24  
25 710 56. Burr E, Dickau S. Leading Practices in Alternate Level of Care (ALC) Avoidance: A  
26 711 Standardized Approach. *Healthc Q* 2017;20(2):44-47. doi: 10.12927/hcq.2017.25227  
27  
28 712 57. Holland DE, Pacyna JE, Gillard KL, et al. Tracking Discharge Delays: Critical First Step  
29 713 Toward Mitigating Process Breakdowns and Inefficiencies. *J Nurs Care Qual*  
30 714 2016;31(1):17-23. doi: <http://dx.doi.org/10.1097/NCQ.0000000000000141>  
31  
32  
33 715 58. Lian YC, Ying SHK, Peng CC, et al. Early discharge study for premature infants: singapore  
34 716 general hospital. *Perm J* 2008;12(4):15-18. doi: 10.7812/tpp/08-040  
35  
36 717 59. Mahant S, Peterson R, Campbell M, et al. Reducing inappropriate hospital use on a general  
37 718 pediatric inpatient unit. *Pediatrics* 2008;121(5):e1068-73. doi: 10.1542/peds.2007-2898  
38  
39  
40 719 60. Moeller JJ, Ma M, Hernandez P, et al. Discharge delay in patients with community-acquired  
41 720 pneumonia managed on a critical pathway. *Can J Infect Dis Med Microbiol*  
42 721 2006;17(2):109-13. doi: <http://dx.doi.org/10.1155/2006/375645>  
43  
44 722 61. Mur-Veeman I, Govers M. Buffer management to solve bed-blocking in the Netherlands  
45 723 2000-2010. Cooperation from an integrated care chain perspective as a key success factor  
46 724 for managing patient flows. *Int J Integr Care* 2011;11(Spec 10th Anniversary Ed):e080.  
47 725 doi: 10.5334/ijic.650  
48  
49  
50 726 62. Niemeijer GC, Trip A, Ahaus KT, et al. Quality in trauma care: improving the discharge  
51 727 procedure of patients by means of Lean Six Sigma. *J Trauma* 2010;69(3):614-19. doi:  
52 728 10.1097/TA.0b013e3181e70f90  
53  
54  
55  
56  
57  
58  
59  
60

- 1  
2  
3 729 63. Ardagh M, Tonkin G, Possenniskie C. Improving acute patient flow and resolving  
4 730 emergency department overcrowding in New Zealand hospitals-the major challenges and  
5 731 the promising initiatives. *N Z Med J* 2011;124(1344):64-73.
- 7 732 64. Brown I, Jellish WS, Kleinman B, et al. Use of postanesthesia discharge criteria to reduce  
8 733 discharge delays for inpatients in the postanesthesia care unit. *J Clin Anesth*  
9 734 2008;20(3):175-79. doi: <http://dx.doi.org/10.1016/j.jclinane.2007.09.014>
- 11 735 65. Gutmanis I, Speziale J, Van Bussel L, et al. The South West Local Health Integration  
12 736 Network Behavioural Supports Ontario Experience. *Healthc Q* 2016;18:50-56. doi:  
13 737 10.12927/hcq.2016.24482
- 15 738 66. Lees-Deutsch L, Jackson J, Balaji DA, et al. Developing a Process for Criteria-Led  
16 739 Discharge: Selection of Patients for Efficient and Effective Discharge (SPEED). *J Nurs*  
17 740 *Care Qual* 2019 doi: <http://dx.doi.org/10.1097/NCQ.0000000000000423>
- 19 741 67. Toronto Central Community Care Access Centre. ALC Avoidance Leading Practices and  
20 742 Improvement Strategies for the Acute Care Sector. Ontario, Canada, 2015.
- 22 743 68. Arendts G, Fitzhardinge S, Pronk K, et al. Front-loading allied health intervention in the  
23 744 emergency department does not reduce length of stay for admitted older patients. *Int J*  
24 745 *Clin Pract* 2013;67(8):807-10. doi: 10.1111/ijcp.12153
- 26 746 69. Béland F, Bergman H, Lebel P, et al. A system of integrated care for older persons with  
27 747 disabilities in Canada: results from a randomized controlled trial. *J Gerontol A-Biol*  
28 748 2006;61(4):367-73. doi: 10.1093/gerona/61.4.367
- 30 749 70. Blecker S, Goldfeld K, Park H, et al. Impact of an Intervention to Improve Weekend Hospital  
31 750 Care at an Academic Medical Center: An Observational Study. *JGIM: Journal of*  
32 751 *General Internal Medicine* 2015;30(11):1657-64. doi: 10.1007/s11606-015-3330-6
- 34 752 71. Boutette M, Hoffer A, Plant J, et al. Establishing an integrated model of subacute care for the  
35 753 frail elderly. *Healthc Manage Forum* 2018;31(4):133-36. doi:  
36 754 10.1177/0840470418774807
- 38 755 72. Bowen A, Kumar R, Howard J, et al. Nurse led discharge: improving efficiency, safely. *Clin*  
39 756 *Govern Int J* 2013;19(2):110-16. doi: 10.1108/CGIJ-03-2013-0007
- 41 757 73. El-Eid GR, Kaddoum R, Tamim H, et al. Improving hospital discharge time: a successful  
42 758 implementation of Six Sigma methodology. *Medicine* 2015;94(12):e633-e33. doi:  
43 759 10.1097/MD.0000000000000633
- 45 760 74. Graham L, Neal CP, Garcea G, et al. Evaluation of nurse-led discharge following  
46 761 laparoscopic surgery. *J Eval Clin Pract* 2012;18(1):19-24. doi: 10.1111/j.1365-  
47 762 2753.2010.01510.x
- 49  
50  
51  
52  
53  
54  
55  
56  
57  
58  
59  
60

- 1  
2  
3 763 75. Maessen JMC, Dejong CHC, Kessels AGH, et al. Length of stay: An inappropriate readout  
4 764 of the success of enhanced recovery programs. *World J Surg* 2008;32(6):971-75. doi:  
5 765 <http://dx.doi.org/10.1007/s00268-007-9404-9>  
6  
7  
8 766 76. Mahto R, Venugopal H, Vibhuti VS, et al. The effectiveness of a hospital diabetes outreach  
9 767 service in supporting care for acutely admitted patients with diabetes. *QJM*  
10 768 2009;102(3):203-07. doi: <http://dx.doi.org/10.1093/qjmed/hcn174>  
11  
12 769 77. Meehan L, Banarsee R, Dunn-Toroosian V, et al. Improving outcomes for patients  
13 770 discharged early using a home assessment scheme. *London J Prim Care* 2018;10(3):62-  
14 771 67. doi: <http://dx.doi.org/10.1080/17571472.2018.1489467>  
15  
16 772 78. Panis LJ, Verheggen FW, Pop P, et al. The impact of hospital discharge on inappropriate  
17 773 hospital stay. *Int J Health Care Qual Assur Inc Leadersh Health Serv* 2004;17(4-5):189-  
18 774 93. doi: 10.1108/09526860410541504  
19  
20  
21 775 79. Sampson MJ, Crowle T, Dhatariya K, et al. Trends in bed occupancy for inpatients with  
22 776 diabetes before and after the introduction of a diabetes inpatient specialist nurse service.  
23 777 *Diabet Med* 2006;23(9):1008-15. doi: 10.1111/j.1464-5491.2006.01928.x  
24  
25 778 80. Starr-Hemburrow L, Parks JM, Bisailon S. Home First: reducing ALC and achieving better  
26 779 outcomes for seniors through inter-organizational collaboration. *Healthc Q*  
27 780 2011;14(1):70-76. doi: 10.12927/hcq.2011.22162  
28  
29  
30 781 81. Taber DJ, Pilch NA, McGillicuddy JW, et al. Improved Patient Safety and Outcomes With a  
31 782 Comprehensive Interdisciplinary Improvement Initiative in Kidney Transplant  
32 783 Recipients. *Am J Med Qual* 2013;28(2):103-12. doi:  
33 784 <http://dx.doi.org/10.1177/1062860612450309>  
34  
35 785 82. Udayai K, Kumar P. Implementing six sigma to improve hospital discharge process. *Int J*  
36 786 *Pharm Sci Res* 2012;3(11):4528-32. doi: [http://dx.doi.org/10.13040/IJPSR.0975-  
37 787 8232.3\(11\).4528-32](http://dx.doi.org/10.13040/IJPSR.0975-8232.3(11).4528-32)  
38  
39  
40 788 83. Calveley P. Doing, not talking: hospital admission avoidance. *Nursing and Residential Care*  
41 789 2007;9(5):230-32. doi: 10.12968/nrec.2007.9.5.23554  
42  
43 790 84. Central East LHIN ALC Task Group. Alternate Level of Care Systems Issues and  
44 791 Recommendations. Ontario, Canada, 2008.  
45  
46 792 85. Joint Improvement Team. Home First - Ten Actions to Transform Discharge. United  
47 793 Kingdom, 2013.  
48  
49  
50 794 86. Krystal A. Southlake at Home Webinar. Canada, 2019.  
51  
52 795 87. LHIN Collaborative. Sharing Best Practices: Transition Management in Ontario - Home  
53 796 First: Implementation Guide and Toolkit. Ontario, Canada, 2011.  
54  
55  
56  
57  
58  
59  
60

- 1  
2  
3 797 88. North West Community Care Access Centre. Wait at Home Fact Sheet. Ontario, Canada,  
4 798 2011.  
5  
6 799 89. Shah N. A New Philosophy Towards Solving The ALC Crisis (Home First). Ontario,  
7 800 Canada, 2010.  
8  
9  
10 801 90. Shah N. A Call to Action on ER/ALC: Promoting Effective Care Across the Health  
11 802 Continuum. Ontario, Canada, 2011.  
12  
13 803 91. Starr-Hemburrow L. Home First - Optimizing Patient Flow and Patient Centred Care Canada,  
14 804 2010.  
15  
16 805 92. Province of New Brunswick. Health Annual Report 2016-2017. New Brunswick, Canada,  
17 806 2017.  
18  
19 807 93. Behan D. Delayed transfers of care -- an early review of progress. *J Integr Care*  
20 808 2005;13(1):43-47. doi: <https://doi.org/10.1108/14769018200500008>  
21  
22  
23 809 94. Levin KA, Crighton E. Measuring the impact of step down intermediate care on delayed  
24 810 discharge: an interrupted time series analysis. *J Epidemiol Community Health*  
25 811 2019;73(7):674-79. doi: <http://dx.doi.org/10.1136/jech-2018-211628>  
26  
27 812 95. Manville M, Klein MC, Bainbridge L. Improved outcomes for elderly patients who received  
28 813 care on a transitional care unit. *Canadian family physician Medecin de famille canadien*  
29 814 2014;60(5):e263-71.  
30  
31  
32 815 96. Rae B, Busby W, Millard PH. Fast-tracking acute hospital care - from bed crisis to bed crisis.  
33 816 *Aust Health Rev* 2007;31(1):50-62. doi: 10.1071/ah070050  
34  
35 817 97. Shah A. The impact of the community care (delayed discharge) act 2003 on the length of stay  
36 818 and bed occupancy in old age psychiatry units in England. *Int J Geriatr Psychiatry*  
37 819 2007;22(11):1164-65. doi: <http://dx.doi.org/10.1002/gps.1808>  
38  
39  
40 820 98. Adams S, Care & Repair England. Reducing Delayed Transfer of Care through housing  
41 821 interventions: Evidence of Impact. United Kingdom, 2017.  
42  
43 822 99. Anonymous. Expedited discharge fund helps uninsured patients. Plan frees up beds for  
44 823 patients who can pay. *Hosp Case Manag* 2008;16(5):70-75.  
45  
46 824 100. Manzano-Santaella A. Payment by Results and delayed discharges. *Br J Health Care*  
47 825 *Manag* 2009;15(9):440-43. doi: 10.12968/bjhc.2009.15.9.44008  
48  
49 826 101. Gaughan J, Gravelle H, Siciliani L. Testing the bed-blocking hypothesis: Does nursing and  
50 827 care home supply reduce delayed hospital discharges? *Health Econ* 2015;24(S1):32-44.  
51 828 doi: <http://dx.doi.org/10.1002/hec.3150>  
52  
53  
54  
55  
56  
57  
58  
59  
60



- 1  
2  
3 829 102. Katsaliaki K, Brailsford S, Browning D, et al. Mapping care pathways for the elderly. *J*  
4 830 *Health Organ Manag* 2005;19(1):57-72. doi:  
5 831 <http://dx.doi.org/10.1108/14777260510592130>
- 7 832 103. Qin S, Thompson C, Bogomolov T, et al. Hospital occupancy and discharge strategies: a  
8 833 simulation-based study. *Intern Med J* 2017;47(8):894-99. doi:  
9 834 <http://dx.doi.org/10.1111/imj.13485>
- 11 835 104. NHS Improvement. Guide to Reducing Long Hospital Stays. United Kingdom, 2018.
- 13 836 105. Hamilton AB, Finley EP. Qualitative methods in implementation research: An introduction.  
14 837 *Psychiatry Res* 2019;280:112516. doi: <https://doi.org/10.1016/j.psychres.2019.112516>
- 16 838 106. Southam-Gerow MA, Dorsey S. Qualitative and mixed methods research in dissemination  
17 839 and implementation science: introduction to the special issue. *J Clin Child Adolesc*  
18 840 *Psychol* 2014;43(6):845-50. doi: 10.1080/15374416.2014.930690 [published Online  
19 841 First: 2014/10/29]
- 21 842 107. Qualitative Research in Implementation Science group. Qualitative Methods in  
22 843 Implementation Science. United States: National Cancer Institute: Division of Cancer  
23 844 Control and Population Sciences, 2019:1-31.
- 25 845 108. Shelton RC, Cooper BR, Stirman SW. The Sustainability of Evidence-Based Interventions  
26 846 and Practices in Public Health and Health Care. *Annu Rev Public Health* 2018;39(1):55-  
27 847 76. doi: 10.1146/annurev-publhealth-040617-014731
- 29 848 109. Geerligs L, Rankin NM, Shepherd HL, et al. Hospital-based interventions: a systematic  
30 849 review of staff-reported barriers and facilitators to implementation processes. *Implement*  
31 850 *Sci* 2018;13(1):36-36. doi: 10.1186/s13012-018-0726-9
- 33 851 110. Green LW, Glasgow RE. Evaluating the relevance, generalization, and applicability of  
34 852 research: issues in external validation and translation methodology. *Evaluation & the*  
35 853 *health professions* 2006;29(1):126-53. doi: 10.1177/0163278705284445 [published  
36 854 Online First: 2006/03/03]
- 38 855 111. Balasubramanian BA, Cohen DJ, Davis MM, et al. Learning Evaluation: blending quality  
39 856 improvement and implementation research methods to study healthcare innovations.  
40 857 *Implement Sci* 2015;10(1):31. doi: 10.1186/s13012-015-0219-z
- 42 858 112. Glasby J, Littlechild R, Pryce K. Show Me the Way to go Home: A Narrative Review of the  
43 859 Literature on Delayed Hospital Discharges and Older People. *Br J Soc Work*  
44 860 2004;34(8):1189-97. doi: 10.1093/bjsw/bch136
- 46 861 113. Zhao G, Kennedy C, Mabaya G, et al. Patient engagement in the development of best  
47 862 practices for transitions from hospital to home: a scoping review. *BMJ Open*  
48 863 2019;9(8):e029693. doi: 10.1136/bmjopen-2019-029693
- 50 864

866 **Tables**867 **Table 1. Categories, descriptions and examples of initiative categorization**

| Category Name                                                                                   | Description                                                                                                                                                                                                                                                                                    | Examples                                                                                                                                                                                                                                                                                                                                     |
|-------------------------------------------------------------------------------------------------|------------------------------------------------------------------------------------------------------------------------------------------------------------------------------------------------------------------------------------------------------------------------------------------------|----------------------------------------------------------------------------------------------------------------------------------------------------------------------------------------------------------------------------------------------------------------------------------------------------------------------------------------------|
| <b>Information Sharing</b><br>A - Live Sharing<br>B - Recommended Initiatives – Calls to Action | <ul style="list-style-type: none"> <li>A - Information sharing through in-person or technology-based communication (synchronous communication)</li> <li>B - Information sharing through documents which share suggestions, recommendations or for information purposes (motivation)</li> </ul> | <ul style="list-style-type: none"> <li>A - Rounding, team meetings, one-on-one communication</li> <li>B - Examples: Suggested strategies (or “Calls to Action”) which ranged from recommending investments in new long-term care beds, increasing funding for behavioural supports, audits and reports, encouraging team building</li> </ul> |
| <b>Tools and Guidelines</b>                                                                     | <ul style="list-style-type: none"> <li>Tangible/ concrete guides to inform practice</li> <li>Implemented tool/ guidance document that is being used in the healthcare system</li> </ul>                                                                                                        | <ul style="list-style-type: none"> <li>Toolkits, guidelines, tools, escalation processes, frameworks</li> </ul>                                                                                                                                                                                                                              |
| <b>Practice Change</b>                                                                          | <ul style="list-style-type: none"> <li>A change in how care is delivered</li> </ul>                                                                                                                                                                                                            | <ul style="list-style-type: none"> <li>Nurse led discharges, roles of providers and/or composition of team are organized differently</li> </ul>                                                                                                                                                                                              |
| <b>Infrastructure and Finances</b>                                                              | <ul style="list-style-type: none"> <li>Tangible structural or financial changes</li> </ul>                                                                                                                                                                                                     | <ul style="list-style-type: none"> <li>Financial penalties/ incentives, building more hospital, rehabilitation or long-term care beds</li> </ul>                                                                                                                                                                                             |
| <b>Other Initiatives</b>                                                                        | <ul style="list-style-type: none"> <li>Different initiative that does not fit into any of the above categories</li> </ul>                                                                                                                                                                      | <ul style="list-style-type: none"> <li>Statistical models (predictive modelling)</li> </ul>                                                                                                                                                                                                                                                  |

868

869 **Table 2. Characteristics of Included Articles**

| Author (Year)                         | Country        | Objective                                                                                                                                                    | Method<br>Study Design                                     | Participants                                                                                                                                                                                            | Sample Size | Key Conclusions                                                                                                                                                                                                                                                                                                           |
|---------------------------------------|----------------|--------------------------------------------------------------------------------------------------------------------------------------------------------------|------------------------------------------------------------|---------------------------------------------------------------------------------------------------------------------------------------------------------------------------------------------------------|-------------|---------------------------------------------------------------------------------------------------------------------------------------------------------------------------------------------------------------------------------------------------------------------------------------------------------------------------|
| <b>Database Searches</b>              |                |                                                                                                                                                              |                                                            |                                                                                                                                                                                                         |             |                                                                                                                                                                                                                                                                                                                           |
| Adlington et al. (2018) <sup>40</sup> | United Kingdom | Reduce length of stay, bed occupancy and delays in discharge and promote care in the appropriate setting among functional older adults on a psychiatric ward | Quantitative<br>Quality Improvement                        | Older adults (65+) on psychiatric ward                                                                                                                                                                  | NR          | <ul style="list-style-type: none"> <li>• Daily rounds and management focusing on long-stay patients were effective in improving length of stay and bed occupancy</li> <li>• Sustained improvements needed support from the quality improvement program and community team</li> </ul>                                      |
| Ardagh et al. (2011) <sup>63</sup>    | New Zealand    | Identify 10 common challenges and promising initiatives relating to patient flow and emergency department overcrowding                                       | Qualitative<br>NR                                          | NR                                                                                                                                                                                                      | NR          | <ul style="list-style-type: none"> <li>• To improve patient flow and emergency department overcrowding the following are needed: <ul style="list-style-type: none"> <li>– a comprehensive, systematic approach</li> <li>– changes to resource usage</li> <li>– sharing of expertise and experience</li> </ul> </li> </ul> |
| Arendts et al. (2013) <sup>68</sup>   | Australia      | Determine if hospital length of stay for older patients is reduced when an allied health intervention is introduced in the emergency department (ED)         | Quantitative<br>Non-randomized prospective pragmatic study | ED patients (65+) diagnosed with one or more of six conditions (cerebrovascular insufficiency; fractured neck of femur; cardiac failure; myocardial ischaemia; exacerbation of chronic airways disease; | 3,572       | <ul style="list-style-type: none"> <li>• Multidisciplinary allied health team assessment in the emergency department has no benefit in reducing hospital length of stay</li> </ul>                                                                                                                                        |

| Author (Year)                        | Country        | Objective                                                                                                                                                        | Method<br>Study Design                                      | Participants                                                                  | Sample Size | Key Conclusions                                                                                                                                                                                                                       |
|--------------------------------------|----------------|------------------------------------------------------------------------------------------------------------------------------------------------------------------|-------------------------------------------------------------|-------------------------------------------------------------------------------|-------------|---------------------------------------------------------------------------------------------------------------------------------------------------------------------------------------------------------------------------------------|
|                                      |                |                                                                                                                                                                  |                                                             | respiratory tract infection)                                                  |             |                                                                                                                                                                                                                                       |
| Baumann et al. (2007) <sup>55</sup>  | United Kingdom | Identify the factors causing good discharge practice performance and organization of services                                                                    | Qualitative<br>Descriptive                                  | Health/ social services staff with managerial involvement in discharges       | 42          | <ul style="list-style-type: none"> <li>• Future research needs to explore the impact of the identified issues on patients, families and staff</li> </ul>                                                                              |
| Behan (2005) <sup>93</sup>           | United Kingdom | Explore the experience of service users across the United Kingdom during the first 6 months of the implementation of the Community Care (Delayed Discharges) Act | Qualitative<br>Explorative                                  | NR                                                                            | NR          | <ul style="list-style-type: none"> <li>• Fines have resulted in a reduction of delayed discharges</li> <li>• The act has brought health and social care together</li> </ul>                                                           |
| Béland et al. (2006) <sup>69</sup>   | Canada         | Assess the transformation of the organization and delivery of health and social services with additional interventions for frail elderly people                  | Quantitative<br>Randomized controlled trial                 | Frail elderly                                                                 | 1,309       | <ul style="list-style-type: none"> <li>• Changing delivery of care for frail elderly persons is feasible</li> <li>• Integrated care can reduce hospital and nursing home use, without impacting cost</li> </ul>                       |
| Blecker et al. (2015) <sup>70</sup>  | United States  | Evaluate the impact of a weekend hospital intervention on care processes, clinical outcomes and length of stay                                                   | Quantitative<br>Interrupted time series observational study | Non-obstetric patients hospitalized                                           | 57,163      | <ul style="list-style-type: none"> <li>• Increased care on weekends may contribute to improved hospital flow, without negatively impacting clinical outcomes (30-day readmissions and mortality)</li> </ul>                           |
| Boutette et al. (2018) <sup>71</sup> | Canada         | Serve frail elderly patients at risk of deconditioning and/or disability, caused by prolonged hospitalization                                                    | NR<br>Review/ description of program                        | Frail older patients who are at risk of deconditioning and/or disability      | NR          | <ul style="list-style-type: none"> <li>• Key features of the model: proactive, restorative, collaborative and integrated, client-centred and cost-effective</li> </ul>                                                                |
| Bowen et al. (2014) <sup>72</sup>    | United Kingdom | Demonstrate that nurse led discharges can improve efficiency on a short stay surgical ward, without impacting patients safety                                    | Quantitative<br>Case study                                  | Adult ear, nose, throat patients having routine, elective, short stay surgery | 265         | <ul style="list-style-type: none"> <li>• Improved efficiency around discharge of elective short-stay ear, nose, throat patients</li> <li>• 95% of ear, nose, throat patients (for simple discharge) are discharged on time</li> </ul> |

| Author (Year)                        | Country       | Objective                                                                                                                         | Method<br>Study Design                                                         | Participants                                                                                      | Sample Size | Key Conclusions                                                                                                                                                                          |
|--------------------------------------|---------------|-----------------------------------------------------------------------------------------------------------------------------------|--------------------------------------------------------------------------------|---------------------------------------------------------------------------------------------------|-------------|------------------------------------------------------------------------------------------------------------------------------------------------------------------------------------------|
| Boyd (2017) <sup>41</sup>            | United States | Explore the leadership strategies used by hospital business administrators to reduce delayed discharges and improve profitability | Qualitative<br>Multiple case study                                             | Hospital administrators                                                                           | 3           | • Effective leadership from hospital administrators contributes to positive outcomes for patients, staff and the economy                                                                 |
| Brankline (2009) <sup>47</sup>       | United States | Provide the appropriate level of care and patient choice when the patient is medically ready for transfer                         | Quantitative<br>Pilot study                                                    | Medical floors with primarily elderly patients who require nursing home placement after discharge | 25          | • Improved information exchange between hospitals and nursing homes                                                                                                                      |
| Brown et al. (2008) <sup>64</sup>    | United States | Determine if the length of patient stay is reduced in the post-anesthesia care unit when nurses use discharge criteria            | Quantitative<br>Prospective clinical study                                     | Adult, ASA physical status I, II, and III patients (18+) requiring general anesthesia             | 1,198       | • Decreased post-anesthesia care unit length of stay and discharge delays while maintaining patient status                                                                               |
| Burr et al. (2017) <sup>56</sup>     | Canada        | Develop a framework that would support ALC avoidance strategies across the Toronto Central Local Health Integration Network       | Case Study<br>Case study                                                       | ALC patients                                                                                      | 3 hospitals | • ALC avoidance reduces burden on patients, families and providers<br>• Long-term solutions to improve patient flow and avoid ALC should be sustainable and align with other initiatives |
| Caminiti et al. (2013) <sup>42</sup> | Italy         | Evaluate the effectiveness of a strategy aimed to reduce delayed hospital discharge                                               | Quantitative<br>Cluster, parallel group, randomized trial/ Quality improvement | Hospital units: geriatric, medicine, long-term care                                               | 3,498       | • Physician direct accountability can reduce unnecessary and avoidable hospital days, especially when delays are within staff control                                                    |
| Chidwick et al. (2017) <sup>54</sup> | Canada        | Discuss concepts and ideas that led to lowest ALC days in the province                                                            | Mixed methods                                                                  | ALC patients                                                                                      | NR          | • Improved patient flow and reduced ALC days through the                                                                                                                                 |

1  
2  
3  
4  
5  
6  
7  
8  
9  
10  
11  
12  
13  
14  
15  
16  
17  
18  
19  
20  
21  
22  
23  
24  
25  
26  
27  
28  
29  
30  
31  
32  
33  
34  
35  
36  
37  
38  
39  
40  
41  
42  
43  
44  
45  
46  
47

| Author (Year)                        | Country        | Objective                                                                                                                                   | Method<br>Study Design                                         | Participants                                                                  | Sample Size | Key Conclusions                                                                                                                                                                                                                                                             |
|--------------------------------------|----------------|---------------------------------------------------------------------------------------------------------------------------------------------|----------------------------------------------------------------|-------------------------------------------------------------------------------|-------------|-----------------------------------------------------------------------------------------------------------------------------------------------------------------------------------------------------------------------------------------------------------------------------|
|                                      |                |                                                                                                                                             | Quality improvement                                            |                                                                               |             | implementation of a multi-dimensional approach                                                                                                                                                                                                                              |
| El-Eid et al. (2015) <sup>73</sup>   | Lebanon        | Assess the effectiveness of the Six Sigma method in improving discharge processes                                                           | Quantitative<br><br>Pre and post-intervention study            | NR                                                                            | 17,054      | <ul style="list-style-type: none"> <li>• Six Sigma can have a positive and sustainable impact on patient flow and length of stay</li> <li>• Discharge delays should be addressed through principles of Six Sigma, rather than institution-specific interventions</li> </ul> |
| Gaughan et al. (2015) <sup>101</sup> | England        | Investigate the reduction in hospital bed-blocking due to a greater supply of nursing home beds or reduced costs                            | Quantitative<br><br>Statistical modelling - Empirical analysis | Patients waiting for hospital discharge                                       | NR          | <ul style="list-style-type: none"> <li>• Improved coordination between health and long-term care is essential for addressing delayed discharges</li> </ul>                                                                                                                  |
| Graham et al. (2012) <sup>74</sup>   | United Kingdom | Evaluate the effect of the laparoscopic nurse specialist on patient discharge                                                               | Quantitative<br><br>Retrospective comparison                   | Laparoscopic cholecystectomy and laparoscopic inguinal hernia repair patients | 128         | <ul style="list-style-type: none"> <li>• Nurse-led discharge may increase discharge post-laparoscopic surgery without impacting patient care</li> </ul>                                                                                                                     |
| Gutmanis et al. (2016) <sup>65</sup> | Canada         | Outline change strategies and their impact health system transformation and those living with responsive behaviors and their family members | Mixed methods<br><br>Quality improvement                       | Individuals with responsive behaviors                                         | NR          | <ul style="list-style-type: none"> <li>• Improved coordination and communication across sectors</li> <li>• Provided healthcare providers with learning opportunities</li> </ul>                                                                                             |
| Henwood (2006) <sup>48</sup>         | United Kingdom | Examine the partnership between health and social care by exploring issues with hospital discharges                                         | Case study<br><br>Case study                                   | Inpatients                                                                    | NR          | <ul style="list-style-type: none"> <li>• Addressing and improving delayed discharges requires partnerships between health and social care and a whole systems-based approach</li> </ul>                                                                                     |
| Holland et al. (2016) <sup>57</sup>  | United States  | Report the development and evaluation of a discharge delay tracking and reporting mechanism                                                 | Quantitative                                                   | Inpatients                                                                    | NR          | <ul style="list-style-type: none"> <li>• Discharge delays can be reduced if system and process breakdowns are identified and addressed</li> </ul>                                                                                                                           |

| Author (Year)                            | Country        | Objective                                                                                                        | Method<br>Study Design                                        | Participants                                                          | Sample Size | Key Conclusions                                                                                                                                 |
|------------------------------------------|----------------|------------------------------------------------------------------------------------------------------------------|---------------------------------------------------------------|-----------------------------------------------------------------------|-------------|-------------------------------------------------------------------------------------------------------------------------------------------------|
|                                          |                |                                                                                                                  | Practice improvement project                                  |                                                                       |             |                                                                                                                                                 |
| Katsaliaki et al. (2005) <sup>102</sup>  | United Kingdom | Describe a project investigating potential care pathways for elderly people after discharge from hospital        | Quantitative<br>Discrete-event simulation, simulation model   | Inpatients                                                            | NR          | • Simulation is a suitable methodology for recording and evaluating the new post-acute packages                                                 |
| Lees-Deutsch et al. (2019) <sup>66</sup> | United Kingdom | Identify core characteristics of patient discharge criteria, recorded in clinical management plans or case notes | Quantitative<br>Systematic observational retrospective review | Patients discharged from the acute medicine unit and short-stay units | 50          | • Criteria led discharge may be suitable for select patients in improving timeliness of discharge                                               |
| Levin et al. (2019) <sup>94</sup>        | Scotland       | Examine the impact of Intermediate Care and the 72-hour target on delayed hospital discharge                     | Quantitative<br>Controlled interrupted time series design     | Patients aged 75+                                                     | 107,022     | • Immediate impact on days delayed, but increasing rates days delayed over time suggests that Intermediate Care services may need to be adapted |
| Lian et al. (2008) <sup>58</sup>         | Singapore      | Develop methods to reduce the hospital length of stay for premature infants by 30%, within 6 months              | Quantitative<br>Retrospective review                          | Premature infants                                                     | 78          | • Discharge planning should begin upon hospital admission<br>• Nurses should coach parents to prepare them to care for their infant at home     |
| Maessen et al. (2008) <sup>75</sup>      | Netherlands    | Assess the effect of enhanced recovery after surgery program on discharge delays                                 | Quantitative<br>Retrospective/prospective study               | Patients undergoing elective colorectal resection                     | 173         | • Additional recovery statistics should be added as outcomes of the ERAS program                                                                |
| Mahant et al. (2008) <sup>59</sup>       | Canada         | Determine if an audit-and-feedback intervention reduces delayed                                                  | Quantitative                                                  | Pediatric inpatient                                                   | 3194        | • Reduced inappropriate hospital days, without impacting readmission rates                                                                      |

| Author (Year)                          | Country        | Objective                                                                                                                           | Method<br>Study Design                                                | Participants                                    | Sample Size | Key Conclusions                                                                                                                                                                                                                                                                                                                  |
|----------------------------------------|----------------|-------------------------------------------------------------------------------------------------------------------------------------|-----------------------------------------------------------------------|-------------------------------------------------|-------------|----------------------------------------------------------------------------------------------------------------------------------------------------------------------------------------------------------------------------------------------------------------------------------------------------------------------------------|
|                                        |                | discharge in a general pediatric inpatient unit                                                                                     | Prospective observational study                                       |                                                 |             | <ul style="list-style-type: none"> <li>Identified processes that impact inappropriate hospital days</li> </ul>                                                                                                                                                                                                                   |
| Mahto et al. (2009) <sup>76</sup>      | United Kingdom | Determine the effect of a diabetes outreach service on delayed discharges and avoidable admissions                                  | Quantitative<br>Cross-sectional audit                                 | Acutely admitted patients with diabetes         | 137         | <ul style="list-style-type: none"> <li>The restructured hospital diabetes outreach service improved outcomes for inpatients with diabetes</li> </ul>                                                                                                                                                                             |
| Maloney et al. (2007) <sup>49</sup>    | United States  | Develop a web-based software application used to facilitate timely patient discharge                                                | Quantitative<br>Quality improvement pilot project                     | Inpatients                                      | NR          | <ul style="list-style-type: none"> <li>Healthcare information technology can facilitate bed management efficiencies</li> <li>Improved coordination and overall inpatient flow</li> </ul>                                                                                                                                         |
| Manville et al. (2014) <sup>95</sup>   | Canada         | Determine if providing interdisciplinary care on a transitional care unit will result in improved clinical outcomes and lower costs | Quantitative<br>Before-and-after structured retrospective chart audit | Elderly ALC patients (70+)                      | 135         | <ul style="list-style-type: none"> <li>Improved health functional outcomes, delivered at a lower cost</li> </ul>                                                                                                                                                                                                                 |
| Meehan et al. (2018) <sup>77</sup>     | United Kingdom | Explore patients' experiences of hospital discharge with the discharge to assess scheme                                             | Qualitative<br>Descriptive                                            | Patients discharged through discharge to assess | 30          | <ul style="list-style-type: none"> <li>Patients and caregivers reported positive and negative experiences with the scheme, but it may be beneficial in improving outcomes for some patients</li> </ul>                                                                                                                           |
| Moeller et al. (2006) <sup>60</sup>    | Canada         | Assess patient and physician-related barriers to discharging patients who have met objective criteria                               | Mixed methods<br>Retrospective assessment                             | Patients with community-acquired pneumonia      | 31          | <ul style="list-style-type: none"> <li>Patients outcomes can be improved by standardizing care through a critical pathway</li> <li>Patients with poor functional capacity (using the Hierarchical Assessment of Balance and Mobility) may need additional services to improve discharge time after clinical stability</li> </ul> |
| Mur-Veeman et al. (2011) <sup>61</sup> | Netherlands    | Explain the theory of buffer management and discuss related previous assumptions                                                    | NR                                                                    | Bed blockers                                    | NR          | <ul style="list-style-type: none"> <li>To practically apply buffer management, current routines, principles and beliefs should shift</li> </ul>                                                                                                                                                                                  |



| Author (Year)                         | Country       | Objective                                                                                                                       | Method<br>Study Design                                                                              | Participants                                 | Sample Size                                                       | Key Conclusions                                                                                                                                                                                                                                                                                            |
|---------------------------------------|---------------|---------------------------------------------------------------------------------------------------------------------------------|-----------------------------------------------------------------------------------------------------|----------------------------------------------|-------------------------------------------------------------------|------------------------------------------------------------------------------------------------------------------------------------------------------------------------------------------------------------------------------------------------------------------------------------------------------------|
|                                       |               |                                                                                                                                 | Review/<br>theoretical<br>paper                                                                     |                                              |                                                                   | to focus on flow between organizations rather than within one organization                                                                                                                                                                                                                                 |
| Niemeijer et al. (2010) <sup>62</sup> | Netherlands   | Reduce the average length of stay to create more admission capacity and reduce costs                                            | Mixed methods<br><br>Efficiency improvement project (retrospective and prospective data collection) | Trauma patients                              | 2006:1114<br><br>2007:1124                                        | <ul style="list-style-type: none"> <li>Lean Six Sigma is effective in reducing length of stay and improving financial efficiency in trauma care</li> </ul>                                                                                                                                                 |
| Panis et al. (2004) <sup>78</sup>     | Netherlands   | Reduce inappropriate hospital stay by adjusting patient logistics, increasing efficiency and providing comfortable surroundings | Quantitative<br><br>Retrospective cohort study                                                      | Mothers of newborn patients                  | 2,889 days of hospital stay of gynecology and obstetrics patients | <ul style="list-style-type: none"> <li>Discharge criteria can reduce inappropriate patient stays related to discharge processes</li> <li>Shifting maternity care to outpatient settings can reduce hospital length of stay</li> </ul>                                                                      |
| Patel et al. (2019) <sup>43</sup>     | United States | Evaluate the impact of team-based multidisciplinary rounds on discharge planning and care efficiency                            | Mixed methods<br><br>Quality improvement initiative                                                 | Dissatisfied patients with delayed discharge | 1584                                                              | <ul style="list-style-type: none"> <li>Multidisciplinary discharge rounds can improve discharge efficiency, length of stay and 30-day readmissions</li> </ul>                                                                                                                                              |
| Pirani (2010) <sup>44</sup>           | Pakistan      | Emphasize the role of nurses to determine factors leading to a lack of discharge planning                                       | NR<br><br>Review/<br>summary                                                                        | Those experiencing delayed discharge         | NR                                                                | <ul style="list-style-type: none"> <li>Nurses play a key role in delivering patient-centred care and can improve discharge planning processes</li> <li>Nurses must have the appropriate knowledge about discharge planning and have the ability to communicate, coordinate and educate patients</li> </ul> |
| Qin et al. (2017) <sup>103</sup>      | Australia     | Identify which barriers to discharge influence hospital occupancy when targeted by a hospital-wide policy                       | Quantitative                                                                                        | NR                                           | NR                                                                | <ul style="list-style-type: none"> <li>Hospital occupancy rates and overcrowding can be improved by improving discharge processes</li> </ul>                                                                                                                                                               |

| Author (Year)                       | Country        | Objective                                                                                                                                                             | Method<br>Study Design                                     | Participants                                                                                       | Sample Size | Key Conclusions                                                                                                                                                                                                                                                                                                            |
|-------------------------------------|----------------|-----------------------------------------------------------------------------------------------------------------------------------------------------------------------|------------------------------------------------------------|----------------------------------------------------------------------------------------------------|-------------|----------------------------------------------------------------------------------------------------------------------------------------------------------------------------------------------------------------------------------------------------------------------------------------------------------------------------|
|                                     |                |                                                                                                                                                                       | Simulation modelling                                       |                                                                                                    |             |                                                                                                                                                                                                                                                                                                                            |
| Rae et al. (2007) <sup>96</sup>     | New Zealand    | Illustrate how the Delayed Discharge Project solved a bed crisis and controlled expenditure                                                                           | Quantitative<br><br>Continuous quality improvement project | Acute general medical                                                                              | 20,034      | <ul style="list-style-type: none"> <li>• The project altered staff behaviour around patient discharge resulting in a better use of resources</li> <li>• The system crashed 2 years post-implementation</li> <li>• There is too much focus on length of stay and bed allocations leading to poor decision making</li> </ul> |
| Roberts et al. (2013) <sup>50</sup> | Australia      | Undertake a preliminary trial of the Goal Length of Stay tool at a rehabilitation center                                                                              | Quantitative<br><br>Prospective study                      | Inpatients in 2 units: stroke rehabilitation unit (SRU) or Brain Injury Rehabilitation Unit (BIRU) | 202         | <ul style="list-style-type: none"> <li>• The program did not reduce length of stay and was perceived negatively by staff</li> </ul>                                                                                                                                                                                        |
| Sampson et al. (2006) <sup>79</sup> | United Kingdom | Describe bed occupancy data in people with diabetes before and after the introduction of a diabetes inpatient specialist nurse service                                | Quantitative<br><br>Retrospective study                    | Diabetes inpatients                                                                                | 152,080     | <ul style="list-style-type: none"> <li>• Diabetes inpatient specialist nurse reduced excess bed occupancy</li> </ul>                                                                                                                                                                                                       |
| Shah (2007) <sup>97</sup>           | England        | Examine the impact of the Community Care (Delayed Discharge) Act on bed occupancy and length of stay in Geriatric Medicine (GM) and Old Age Psychiatry (OAP) services | Quantitative<br><br>Retrospective study                    | Inpatient - specialties of GM and OAP services                                                     | NR          | <ul style="list-style-type: none"> <li>• More patients were admitted to GM services and had a shorter length of stay than OAP</li> </ul>                                                                                                                                                                                   |
| Sobotka et al. (2017) <sup>51</sup> | United States  | Describe a hospital-to-home transitional care model                                                                                                                   | Case study<br><br>Illustrative case design/ review         | Pediatric inpatient                                                                                | 1           | <ul style="list-style-type: none"> <li>• Transitional care programs can improve care for vulnerable populations by reducing health and developmental differences</li> </ul>                                                                                                                                                |
| Starr-Hemburrow                     | Canada         | Minimize the number of post-acute patients transitioning from hospital                                                                                                | Quantitative                                               | ALC patients                                                                                       | NR          | <ul style="list-style-type: none"> <li>• Inter and intra-professional collaboration is important to</li> </ul>                                                                                                                                                                                                             |

| Author (Year)                          | Country        | Objective                                                                                                                                   | Method<br>Study Design                   | Participants                                                                  | Sample Size | Key Conclusions                                                                                                                                                                                |
|----------------------------------------|----------------|---------------------------------------------------------------------------------------------------------------------------------------------|------------------------------------------|-------------------------------------------------------------------------------|-------------|------------------------------------------------------------------------------------------------------------------------------------------------------------------------------------------------|
| et al. (2011) <sup>80</sup>            |                | to long-term care and develop an integrated plan for appropriate care and placement                                                         | Quality improvement                      |                                                                               |             | standardize discharge processes, build trust and respect and improve coordination of care                                                                                                      |
| Sutherland et al. (2013) <sup>45</sup> | Canada         | Describe structural challenges to reduce the impact of ALC patients and to propose policy alternatives that could reduce occupancy          | NR<br>Discussion and debate article      | ALC patients                                                                  | NR          | • A collaborative approach combining the three strategies should be considered to address ALC                                                                                                  |
| Taber et al. (2013) <sup>81</sup>      | United States  | Test a program to improve length of stay, delayed discharges and early readmissions for kidney transplant recipients                        | Quantitative<br>Observational study      | Adult kidney transplant recipients                                            | 476         | • Improving medication safety post kidney transplant can improve clinical outcomes (acute rejection and infection rates, readmission rates)                                                    |
| Udayai et al. (2012) <sup>82</sup>     | India          | Reduce patient discharge time through a Six Sigma project                                                                                   | Quantitative<br>Time motion study        | Cash patients                                                                 | NR          | • Improving discharge time allowed for more patients to be managed, improving revenue<br>• Leadership support and employee participation were essential for success                            |
| Williams et al. (2010) <sup>52</sup>   | Australia      | Examine the impact of a critical care outreach service on frequency of discharge delay from the intensive care unit                         | Quantitative<br>Prospective cohort study | Patients discharged from the ICU                                              | 1,123       | • The critical care outreach role did not decrease delayed discharges<br>• Reducing delays requires a collaborative approach focusing on hospital flow, rather than just the discharge process |
| Younis et al. (2011) <sup>53</sup>     | United Kingdom | Compare the effect of an enhanced recovery program with preoperative stoma education on the number of patients with prolonged hospital stay | Quantitative<br>Prospective study        | Patients undergoing anterior resection with the formation of a loop ileostomy | 120         | • Pre-operatively integrating stoma management education into an enhanced recovery program can reduce delayed discharges                                                                       |
| <b>Grey Literature</b>                 |                |                                                                                                                                             |                                          |                                                                               |             |                                                                                                                                                                                                |
| Anonymous (2008) <sup>99</sup>         | United States  | Create an expedited discharge fund to pay for goods and services inhibiting a patient's discharge                                           | N/A<br>News article                      | Uninsured patients                                                            | NR          | • Patients can be safely discharged through support from the discharge fund                                                                                                                    |

| Author (Year)                                                | Country        | Objective                                                                                                                                        | Method<br>Study Design                                         | Participants                                     | Sample Size | Key Conclusions                                                                                                                                                    |
|--------------------------------------------------------------|----------------|--------------------------------------------------------------------------------------------------------------------------------------------------|----------------------------------------------------------------|--------------------------------------------------|-------------|--------------------------------------------------------------------------------------------------------------------------------------------------------------------|
|                                                              |                | (medical equipment, medication and transportation)                                                                                               |                                                                |                                                  |             |                                                                                                                                                                    |
| Anonymous (2010) <sup>46</sup>                               | United States  | Improve patient flow through initiatives that decrease length of stay and increase capacity                                                      | N/A<br>News article                                            | NR                                               | NR          | •NR                                                                                                                                                                |
| Calveley (2007) <sup>83</sup>                                | United Kingdom | Create a tier of support to reduce the unnecessary and costly occupation of hospital beds                                                        | N/A<br>Review                                                  | NR                                               | NR          | •Healthcare solutions should be developed in partnership with health and community service providers                                                               |
| Manzano-Santaella (2009) <sup>100</sup>                      | United Kingdom | Analyse the relationship between Payment by Results and the Delayed Discharges Act                                                               | N/A<br>Policy analysis                                         | NR                                               | NR          | •Quantitative measures (days delayed and costs) conflict with the social aspects of overall health and well-being                                                  |
| Krystal (2019) <sup>86</sup>                                 | Canada         | NR                                                                                                                                               | Mixed methods<br>Continuous quality improvement and evaluation | Medically and socially complex and frail elderly | 100+        | •Engaging partners early in the conception of the program was critical to its success                                                                              |
| Walker (2011) <sup>2</sup>                                   | Canada         | Develop recommendations of care for frail Canadians                                                                                              | N/A<br>N/A                                                     | NR                                               | NR          | •Community supports should be increased to keep people in their home as long as possible<br>•Programs and services should be aimed at restoration and reactivation |
| North West Community Care Access Centre (2011) <sup>88</sup> | Canada         | Create a fact sheet of the benefits of staying at home and using Wait at Home (enhanced home care services while people wait for long-term care) | N/A<br>N/A                                                     | Seniors waiting for LTC placement                | NR          | •Staying home provides benefits for seniors including fewer risks (germs/ viruses) and a familiar setting compared to the hospital                                 |
| Toronto Central Community Care Access                        | Canada         | NR                                                                                                                                               | N/A<br>N/A                                                     | NR                                               | NR          | •This framework can help improve results around ALC avoidance and management                                                                                       |

| Author (Year)                                         | Country        | Objective                                                                                                                                                                     | Method<br>Study Design                  | Participants                               | Sample Size | Key Conclusions                                                                                                                                                                        |
|-------------------------------------------------------|----------------|-------------------------------------------------------------------------------------------------------------------------------------------------------------------------------|-----------------------------------------|--------------------------------------------|-------------|----------------------------------------------------------------------------------------------------------------------------------------------------------------------------------------|
| Centre (2015) <sup>67</sup>                           |                |                                                                                                                                                                               |                                         |                                            |             |                                                                                                                                                                                        |
| Province of New Brunswick (2017) <sup>92</sup>        | Canada         | Identify priority strategic initiatives and implement community support orders across the province                                                                            | N/A<br>Annual Report                    | NR                                         | NR          | •NR                                                                                                                                                                                    |
| NHS Improvement (2018) <sup>104</sup>                 | United Kingdom | Create a how-to guide explaining implementation approaches to reduce length of stay                                                                                           | N/A<br>Guide                            | NR                                         | NR          | •Clinical leadership is essential for implementing these initiatives                                                                                                                   |
| Starr-Hemburrow (2010) <sup>91</sup>                  | Canada         | Improve patient flow through the implementation of change management initiatives                                                                                              | Quantitative<br>Quality Improvement     | NR                                         | NR          | •Culture change requires support and attention to be sustained over time                                                                                                               |
| LHIN Collaborative (2011) <sup>87</sup>               | Canada         | Help support patients in their homes for as long as possible by providing them with community supports                                                                        | N/A<br>Implementation Guide and Toolkit | Patients (specifically high needs seniors) | NR          | •Home First should be implemented as a system-wide approach                                                                                                                            |
| Shah (2011) <sup>90</sup>                             | Canada         | Ensure the appropriate community resources are in place to support the patient upon discharge                                                                                 | N/A<br>Implementation Guide and Toolkit | High need seniors (75+)                    | NR          | •Key success factors included: eliminating long discharge processes, having engaged leadership, having measurable targets, monitoring performance and educating patients and providers |
| Central East LHIN ALC Task Group (2008) <sup>84</sup> | Canada         | Understand the impact of delayed discharges in the Central East regions of Ontario (reviewing data, reading reports, initiating a pilot study, developing a patient flow map) | N/A<br>Report                           | ALC patients                               | NR          | •ALC is a complex issue and requires coordination across sectors<br>•Implementation of the recommendations will help to reduce ALC days and improve patient flow                       |
| Adams, Care and Repair                                | United Kingdom | Assist older patients in returning home from hospital quickly and safely                                                                                                      | Case Study                              | Older patients                             | 1           | •Large savings for the health system can be generated with the                                                                                                                         |

1  
2  
3  
4  
5  
6  
7  
8  
9  
10  
11  
12  
13  
14  
15  
16  
17  
18  
19  
20  
21  
22  
23  
24  
25  
26  
27  
28  
29  
30  
31  
32  
33  
34  
35  
36  
37  
38  
39  
40  
41  
42  
43  
44  
45  
46  
47

| Author (Year)                               | Country  | Objective                                                       | Method<br>Study Design                                | Participants     | Sample Size | Key Conclusions                                                                                                                                                                                   |
|---------------------------------------------|----------|-----------------------------------------------------------------|-------------------------------------------------------|------------------|-------------|---------------------------------------------------------------------------------------------------------------------------------------------------------------------------------------------------|
| England (2017) <sup>98</sup>                |          |                                                                 | Case Study                                            |                  |             | implementation of this intervention                                                                                                                                                               |
| Shah (2010) <sup>89</sup>                   | Canada   | Describe the Home First approach, a philosophy for reducing ALC | Quantitative<br>Quality improvement                   | Elderly patients | NR          | <ul style="list-style-type: none"> <li>• Allows patients the opportunity to regain independence and return home</li> <li>• ALC solutions need a collaborative, cross-sectoral approach</li> </ul> |
| Joint Improvement Team (2013) <sup>85</sup> | Scotland | Identify 10 action items to transform discharge processes       | N/A<br>Quality improvement/<br>stakeholder engagement | N/A              | NR          | <ul style="list-style-type: none"> <li>• There are a number of factors to successfully reduce delays</li> </ul>                                                                                   |

870 Abbreviations: N/A = not applicable; NR = not reported; ALC = alternate level of care; ED = emergency department; SRU = stroke rehabilitation unit (SRU);  
871 BIRU = Brain Injury Rehabilitation Unit; GM = geriatric medicine; OAP = Old Age Psychiatry

872 **Table 3. Initiative Characteristics**

| Author                                | Initiative Description/ Content                                                                                                                                                                                                                                                                                                 | Target Population                                                         | Setting                                                       | Initiative Category <sup>1</sup>              | Results                                                                                                                                                                                                                                                                                                                                      |
|---------------------------------------|---------------------------------------------------------------------------------------------------------------------------------------------------------------------------------------------------------------------------------------------------------------------------------------------------------------------------------|---------------------------------------------------------------------------|---------------------------------------------------------------|-----------------------------------------------|----------------------------------------------------------------------------------------------------------------------------------------------------------------------------------------------------------------------------------------------------------------------------------------------------------------------------------------------|
| <b>Database Searches</b>              |                                                                                                                                                                                                                                                                                                                                 |                                                                           |                                                               |                                               |                                                                                                                                                                                                                                                                                                                                              |
| Adlington et al. (2018) <sup>40</sup> | Quality Improvement Program <ul style="list-style-type: none"> <li>• Weekly quality improvement meetings with driver diagrams to implement Plan Do Study Act cycles</li> </ul>                                                                                                                                                  | Older adults (≥65) on psychiatric ward                                    | Hospital<br><br>Mile End Hospital (Leadenhall Ward), 26 beds  | Information Sharing Live                      | <ul style="list-style-type: none"> <li>• Length of stay was reduced from an average of 47 days to 30 days</li> <li>• Bed occupancy was reduced from 77% to 54%</li> </ul>                                                                                                                                                                    |
| Ardagh et al. (2011) <sup>63</sup>    | 10 Promising Initiatives <ul style="list-style-type: none"> <li>• Special beds, hospital operations planning, discharge planning, access to imaging, responsive acute secondary services, pathways for acute patients, acute demand mitigation, enhanced ED layout, enhanced ED senior staffing, engagement of staff</li> </ul> | NR                                                                        | Hospitals                                                     | Tools and Guidelines<br><br>Practice Changes  | <ul style="list-style-type: none"> <li>• Identified top 10 challenges and 10 promising initiatives related to patient flow and emergency department overcrowding</li> </ul>                                                                                                                                                                  |
| Arendts et al. (2013) <sup>68</sup>   | Allied Health Assessment <ul style="list-style-type: none"> <li>• A comprehensive assessment of patients by an allied health team within hours of presentation to the hospital through the emergency department</li> </ul>                                                                                                      | Patients (≥65) diagnosed with one or more of six predetermined conditions | Hospitals<br><br>Two Australian tertiary hospitals            | Practice Change                               | <ul style="list-style-type: none"> <li>• No benefit in reducing hospital length of stay</li> </ul>                                                                                                                                                                                                                                           |
| Baumann et al. (2007) <sup>55</sup>   | N/A <ul style="list-style-type: none"> <li>• Qualitative study to identify factors associated with low rates of delayed discharges</li> </ul>                                                                                                                                                                                   | Health/ social services staff with managerial involvement in discharges   | Hospitals (6 sites)<br><br>4 southern sites, 2 northern sites | Initiatives described touch on all categories | <ul style="list-style-type: none"> <li>• 6 high performing hospital sites identified issues impacting delayed discharges (capacity, internal hospital efficiencies and interagency efficiencies)</li> <li>• Resources and teams to prevent avoidable admissions</li> <li>• Discharge teams to support nurses' discharge planning,</li> </ul> |

<sup>1</sup> Initiative category is based on Doern and Phidd's adapted framework 39. Hosseus D, Pal LA. Anatomy of a Policy Area: The Case of Shipping. *Can Public Policy* 1997;23(4):399-415. doi: 10.2307/3552071

| Author                               | Initiative Description/ Content                                                                                                                                                                                                                                    | Target Population                                                                             | Setting                                                                     | Initiative Category <sup>1</sup> | Results                                                                                                                                                                                                                                                                         |
|--------------------------------------|--------------------------------------------------------------------------------------------------------------------------------------------------------------------------------------------------------------------------------------------------------------------|-----------------------------------------------------------------------------------------------|-----------------------------------------------------------------------------|----------------------------------|---------------------------------------------------------------------------------------------------------------------------------------------------------------------------------------------------------------------------------------------------------------------------------|
|                                      |                                                                                                                                                                                                                                                                    |                                                                                               |                                                                             |                                  | <ul style="list-style-type: none"> <li>• Systems for monitoring and communicating patients' progress,</li> <li>• Patient choice protocols</li> <li>• Ensure availability of responsive transportation and discharge lounges</li> </ul>                                          |
| Behan (2005) <sup>93</sup>           | Community Care (Delayed Discharge) Act 2003 <ul style="list-style-type: none"> <li>• Local authorities are financially responsible (payments) to acute hospital when patients remain in hospital because community care arrangements have not been made</li> </ul> | NR                                                                                            | 7 areas across the United Kingdom                                           | Infrastructure and Money         | <ul style="list-style-type: none"> <li>• National decrease in delayed discharges between 2003 and 2004</li> </ul>                                                                                                                                                               |
| Béland et al. (2006) <sup>69</sup>   | Integrated Care <ul style="list-style-type: none"> <li>• Community-based multidisciplinary teams who provide integrated care and coordinate health and social service</li> </ul>                                                                                   | Frail elderly                                                                                 | Community service centres/ organizations                                    | Practice Change                  | <ul style="list-style-type: none"> <li>• Significant (50%) reduction in the number of patients in the integrated care group that became ALC</li> <li>• No significant differences in utilization or costs between groups</li> <li>• Increased caregiver satisfaction</li> </ul> |
| Blecker et al. (2015) <sup>70</sup>  | 7-Day Hospital Initiative <ul style="list-style-type: none"> <li>• Increased hospital services on the weekend (e.g. diagnostic imaging, weekend discharges, physician and care management services)</li> </ul>                                                     | Non-obstetric hospitalized patients                                                           | Hospital<br><br>Tisch Hospital, 705 beds                                    | Practice Change                  | <ul style="list-style-type: none"> <li>• Decreased average length of stay by 13%</li> <li>• Increased proportion of weekend discharges by 12%</li> <li>• Decreased 30-day readmissions</li> <li>• No changes in mortality</li> </ul>                                            |
| Boutette et al. (2018) <sup>71</sup> | Subacute Care Unit for Frail Elderly <ul style="list-style-type: none"> <li>• Subacute care in a restorative environment (integrated care and restoration)</li> </ul>                                                                                              | Frail older patients who are at risk of deconditioning associated with a long hospitalization | Hospitals<br><br>Ottawa Hospital; Perley and Rideau Veterans' Health Centre | Practice Change                  | <ul style="list-style-type: none"> <li>• N/A</li> </ul>                                                                                                                                                                                                                         |
| Bowen et al. (2014) <sup>72</sup>    | Nurse led discharge <ul style="list-style-type: none"> <li>• Allows nurses to facilitate discharge based on specific criteria that was developed to guide the discharge</li> </ul>                                                                                 | Adult ear, nose, throat patients having routine,                                              | Hospital<br><br>University Hospital of                                      | Practice Change                  | <ul style="list-style-type: none"> <li>• Significant reduction in rate of delayed discharges in both audits</li> </ul>                                                                                                                                                          |



| Author                               | Initiative Description/ Content                                                                                                                                                                     | Target Population                                                                                   | Setting                                                                                                       | Initiative Category <sup>1</sup>                     | Results                                                                                                                                                                                                                                                                                                            |
|--------------------------------------|-----------------------------------------------------------------------------------------------------------------------------------------------------------------------------------------------------|-----------------------------------------------------------------------------------------------------|---------------------------------------------------------------------------------------------------------------|------------------------------------------------------|--------------------------------------------------------------------------------------------------------------------------------------------------------------------------------------------------------------------------------------------------------------------------------------------------------------------|
|                                      | process (also allows for discharge in evenings and on weekends)                                                                                                                                     | elective, short-stay surgery                                                                        | South Manchester                                                                                              |                                                      |                                                                                                                                                                                                                                                                                                                    |
| Boyd (2017) <sup>41</sup>            | Communication and Leadership <ul style="list-style-type: none"> <li>• Efficient communication and leadership from hospital administrators</li> </ul>                                                | NR                                                                                                  | Hospitals (2)<br><br>Part of a hospital conglomerate in Chicago                                               | Information Sharing Live                             | <ul style="list-style-type: none"> <li>• Strategies for improving delayed discharges and reducing financial burden included efficient communication and effective leadership</li> </ul>                                                                                                                            |
| Brankline (2009) <sup>47</sup>       | Technology-Assisted Referrals <ul style="list-style-type: none"> <li>• The use of technology to improve information exchange and processes, increase data accuracy and produce documents</li> </ul> | Elderly patients who require nursing home placement after hospital discharge                        | Academic Medical Center                                                                                       | Information Sharing Live<br><br>Tools and Guidelines | <ul style="list-style-type: none"> <li>• Decreased length of stay and improved timely discharges of patients resulted in cost savings</li> <li>• Increased communication within and between the hospital and nursing homes</li> </ul>                                                                              |
| Brown et al. (2008) <sup>64</sup>    | Discharge Criteria <ul style="list-style-type: none"> <li>• Nurse implementation of predetermined discharge criteria (activity, respirations, pulse, blood pressure, pain, etc.)</li> </ul>         | Adult, ASA physical status I, II, and III patients, 18 years or older, requiring general anesthesia | Hospital<br><br>Postoperative recovery area of a large, tertiary-care, academic hospital                      | Tools and Guidelines<br><br>Practice Change          | <ul style="list-style-type: none"> <li>• Decreased length of stay in the post-anesthesia care unit by 24%</li> <li>• Reduced discharge delays with nurse-led discharge</li> <li>• No change in adverse events (airway obstruction, reintubation, arrest)</li> </ul>                                                |
| Burr et al. (2017) <sup>56</sup>     | ALC Avoidance Framework <ul style="list-style-type: none"> <li>• A framework of strategies to reduce ALC numbers and promote ALC avoidance</li> </ul>                                               | ALC patients                                                                                        | Hospitals (3)<br><br>(1) Michael Garron Hospital<br>(2) Humber River Hospital<br>(3) Toronto General Hospital | Tools and Guidelines                                 | <ul style="list-style-type: none"> <li>• (1) MGH – exceeded ALC target by 20%, reduced number of ALC patients waiting for long-term care</li> <li>• (2) HRH – culture shift after implementation of ALC framework recommendations</li> <li>• (3) TGH – improved number of ALC admission avoidance cases</li> </ul> |
| Caminiti et al. (2013) <sup>42</sup> | Physician Accountability <ul style="list-style-type: none"> <li>• Physician motivation and accountability through monthly</li> </ul>                                                                | Hospital Units: geriatric,                                                                          | Hospital<br><br>University Hospital of                                                                        | Information Sharing Live                             | <ul style="list-style-type: none"> <li>• Reduction in unnecessary, avoidable hospital days</li> <li>• No significant changes in 30-day readmission or mortality</li> </ul>                                                                                                                                         |

| Author                               | Initiative Description/ Content                                                                                                                                                                                                       | Target Population                                                                       | Setting                                                                                                  | Initiative Category <sup>1</sup>                                         | Results                                                                                                                                                                                                                                                       |
|--------------------------------------|---------------------------------------------------------------------------------------------------------------------------------------------------------------------------------------------------------------------------------------|-----------------------------------------------------------------------------------------|----------------------------------------------------------------------------------------------------------|--------------------------------------------------------------------------|---------------------------------------------------------------------------------------------------------------------------------------------------------------------------------------------------------------------------------------------------------------|
|                                      | reports and audits (can compare their length of stay results to other staff)                                                                                                                                                          | medicine, long-term care                                                                | Parma, 1267 beds                                                                                         |                                                                          |                                                                                                                                                                                                                                                               |
| Chidwick et al. (2017) <sup>54</sup> | Change Ideas<br><ul style="list-style-type: none"> <li>• Identification of change concepts, followed by the development and implementation of change ideas to promote behaviour change</li> </ul>                                     | ALC patients                                                                            | Hospital<br><br>William Osler Health System                                                              | Practice Change<br><br>Tools, guidelines<br><br>Information sharing Live | <ul style="list-style-type: none"> <li>• Lowest ALC days in Ontario</li> <li>• Eliminated ethical errors, improved patient discharge experience and decreased patient confusion</li> </ul>                                                                    |
| El-Eid et al. (2015) <sup>73</sup>   | Hospital Throughput Project using Six Sigma Methodology<br><ul style="list-style-type: none"> <li>• The use of Six Sigma Methodology to implement electronic patient requests, a floor clerk and a billing officer</li> </ul>         | NR                                                                                      | Hospital (tertiary care teaching hospital)<br><br>American University of Beirut Medical Center, 386 beds | Practice Change                                                          | <ul style="list-style-type: none"> <li>• Significant reduction in length of stay post-intervention</li> <li>• Decreased discharge time (2.2 hours to 1.7 hours)</li> </ul>                                                                                    |
| Gaughan et al. (2015) <sup>101</sup> | Increasing supply of nursing home beds<br><ul style="list-style-type: none"> <li>• The use of modeling to explore the effect of increased supply of nursing home beds or lower prices of nursing home beds on bed blocking</li> </ul> | Patients waiting for hospital discharge                                                 | Hospital                                                                                                 | Other Initiative                                                         | <ul style="list-style-type: none"> <li>• Increasing home care beds by 10% would decrease social care delayed discharges by 6-9%</li> </ul>                                                                                                                    |
| Graham et al. (2012) <sup>74</sup>   | Nurse-led Discharge<br><ul style="list-style-type: none"> <li>• Nurse led discharge following list of criteria (that each patient must meet)</li> </ul>                                                                               | Patients receiving laparoscopic cholecystectomy and laparoscopic inguinal hernia repair | Hospital<br><br>Leicester Royal Infirmary                                                                | Practice Change                                                          | <ul style="list-style-type: none"> <li>• Nurse-led discharge group were significantly more likely to be discharged on the day of surgery</li> <li>• No significant difference in readmission rates or patients seeking primary care post-discharge</li> </ul> |
| Gutmanis et al. (2016) <sup>65</sup> | Behavioural Supports Ontario<br><ul style="list-style-type: none"> <li>• A quality improvement initiative for older adults with responsive</li> </ul>                                                                                 | Individuals with                                                                        | South West LHIN                                                                                          | Practice Change                                                          | <ul style="list-style-type: none"> <li>• Decreased ALC care cases among persons with behavioural needs</li> </ul>                                                                                                                                             |

| Author                                   | Initiative Description/ Content                                                                                                                                                                                                                                                              | Target Population                                          | Setting                                                 | Initiative Category <sup>1</sup>                     | Results                                                                                                                                                                                                                                                          |
|------------------------------------------|----------------------------------------------------------------------------------------------------------------------------------------------------------------------------------------------------------------------------------------------------------------------------------------------|------------------------------------------------------------|---------------------------------------------------------|------------------------------------------------------|------------------------------------------------------------------------------------------------------------------------------------------------------------------------------------------------------------------------------------------------------------------|
|                                          | behaviours through the identification of change strategies and knowledge translation best practices                                                                                                                                                                                          | responsive behaviours                                      |                                                         | Tools, guidelines                                    | <ul style="list-style-type: none"> <li>Improved perceptions from families and clients around patient care</li> </ul>                                                                                                                                             |
| Henwood (2006) <sup>48</sup>             | Change Agent Team <ul style="list-style-type: none"> <li>A team partnership between health and social care to explore the issues around delayed discharges</li> </ul>                                                                                                                        | Inpatients                                                 |                                                         | Information sharing Live<br><br>Tools and guidelines | <ul style="list-style-type: none"> <li>The Change Agent Team helped support implementation of contingency arrangements at the local level</li> </ul>                                                                                                             |
| Holland et al. (2016) <sup>57</sup>      | Tracking and reporting system <ul style="list-style-type: none"> <li>Development and evaluation of a discharge delay tracking and reporting mechanism</li> </ul>                                                                                                                             | Inpatients                                                 | Hospital (academic medical center)                      | Tools and Guidelines                                 | <ul style="list-style-type: none"> <li>Individual patient discharges may be improved by tracking factors that cause delays</li> <li>Nurses took the time to provide comments regarding patient delays</li> </ul>                                                 |
| Katsaliaki et al. (2005) <sup>102</sup>  | Intermediate Care Services <ul style="list-style-type: none"> <li>Statistical simulations to investigate potential care pathways and associated costs</li> </ul>                                                                                                                             | Inpatients                                                 | Hampshire Social Services                               | Other Initiative                                     | <ul style="list-style-type: none"> <li>500 new places will help to balance the demand and capacity for Intermediate Care Services by avoiding a deterioration of delay times</li> </ul>                                                                          |
| Lees-Deutsch et al. (2019) <sup>66</sup> | Criteria Led Discharge - Selection of Patients for Efficient and Effective Discharge (SPEED) <ul style="list-style-type: none"> <li>Patient discharge is guided by a set of clinical criteria; once the patient meets the criteria, a member of the team can facilitate discharge</li> </ul> | Patients discharged from the AMU and both short-stay wards | Hospital (acute medicine service with 4 clinical areas) | Tools and Guidelines<br><br>Practice Change          | <ul style="list-style-type: none"> <li>27 patients were suitable for CLD, 23 were not</li> <li>Mean wait time for the 27 suitable patients prior to discharge was 4 hours and 51 minutes</li> <li>Discharge delays were often caused by system delays</li> </ul> |
| Levin et al. (2019) <sup>94</sup>        | Step-up Intermediate Care Units <ul style="list-style-type: none"> <li>A bridging service between hospital and home for individuals ready for discharge from acute care; allows for recovery and regaining of independence</li> </ul>                                                        | Aged 75+                                                   | Hospital                                                | Infrastructure and Money                             | <ul style="list-style-type: none"> <li>Reduced bed days delayed</li> <li>Rate of days delayed increased over time</li> </ul>                                                                                                                                     |
| Lian et al. (2008) <sup>58</sup>         | New Discharge Guidelines for Premature Babies <ul style="list-style-type: none"> <li>Development of new discharge guidelines for premature neonates</li> </ul>                                                                                                                               | Premature infants                                          | Hospital<br><br>Singapore General Hospital              | Tools and Guidelines                                 | <ul style="list-style-type: none"> <li>Reduced median duration of hospitalization from 58.2 days to 34.9 days</li> <li>Cost savings of \$6174/ infant</li> </ul>                                                                                                 |

| Author                               | Initiative Description/ Content                                                                                                                                                                                                                                               | Target Population                                 | Setting                                                             | Initiative Category <sup>1</sup>                     | Results                                                                                                                                                                                                                                                                                 |
|--------------------------------------|-------------------------------------------------------------------------------------------------------------------------------------------------------------------------------------------------------------------------------------------------------------------------------|---------------------------------------------------|---------------------------------------------------------------------|------------------------------------------------------|-----------------------------------------------------------------------------------------------------------------------------------------------------------------------------------------------------------------------------------------------------------------------------------------|
| Maessen et al. (2008) <sup>75</sup>  | Enhanced Recovery After Surgery (ERAS)<br><ul style="list-style-type: none"> <li>Reduction in the postoperative recovery period to reduce overall hospital length of stay</li> </ul>                                                                                          | Patients undergoing elective colorectal resection | Hospital                                                            | Practice Change                                      | <ul style="list-style-type: none"> <li>No significant difference in proportion of patients with a discharge delay post-ERAS program</li> <li>Approximately 90% of patients pre and post-ERAS were not discharged on the day discharge criteria/ functional recovery were met</li> </ul> |
| Mahant et al. (2008) <sup>59</sup>   | Medical Care Appropriateness Protocol (MCAP) - Audit and Feedback<br><ul style="list-style-type: none"> <li>A tool that provides information on hospital bed use (qualified and nonqualified hospital days)</li> </ul>                                                        | Pediatric inpatients                              | Hospital<br><br>Hospital for Sick Children                          | Tools and Guidelines                                 | <ul style="list-style-type: none"> <li>Significantly lower risk of inappropriate hospital days</li> <li>During the intervention, 33% of bed days were nonqualified, compared to 47% pre-intervention</li> <li>No change in 48-hour readmission rate</li> </ul>                          |
| Mahto et al. (2009) <sup>76</sup>    | Hospital Diabetes Outreach Service<br><ul style="list-style-type: none"> <li>A service to prevent admission through a number of strategies (improved access to services, management of medical problems, early discharge planning, organization of follow-up care)</li> </ul> | Acutely admitted patients with diabetes           | Hospital<br><br>New Cross Hospital, 700 beds                        | Practice Change                                      | <ul style="list-style-type: none"> <li>Reduction in bed occupancy, inappropriate admissions, delayed discharges and effective discharge planning</li> </ul>                                                                                                                             |
| Maloney et al. (2007) <sup>49</sup>  | Patient Tracker<br><ul style="list-style-type: none"> <li>A web-based application to facilitate the discharge process by enhancing communication between disciplines</li> </ul>                                                                                               | Inpatients                                        | Hospital<br><br>Primary Children's Medical Center                   | Tools and Guidelines<br><br>Information Sharing Live | <ul style="list-style-type: none"> <li>Decreased number of cancelled surgeries, median emergency department length of stay and average number of inpatient admissions</li> </ul>                                                                                                        |
| Manville et al. (2014) <sup>95</sup> | Transitional Care Unit<br><ul style="list-style-type: none"> <li>A rehabilitation-style unit with enhanced nursing and rehabilitation services for elderly patients</li> </ul>                                                                                                | Elderly ALC patients (70+)                        | Hospital<br><br>St Joseph's Hospital, 22-bed transitional care unit | Infrastructure and Money                             | <ul style="list-style-type: none"> <li>Improved health outcomes and discharge disposition, decreased length of stay and costs per patient</li> </ul>                                                                                                                                    |
| Meehan et al. (2018) <sup>77</sup>   | Discharge to Assess (D2A)<br><ul style="list-style-type: none"> <li>Patients who require care support are discharged home, or to the community, for a needs assessment in their personal environment</li> </ul>                                                               | Patients discharged through D2A                   | Hospital                                                            | Practice Change                                      | <ul style="list-style-type: none"> <li>Assists with early and effective hospital discharge</li> <li>60% of patients and caregivers reported a positive experience with D2A</li> <li>Communication was noted as an issue</li> </ul>                                                      |

| Author                                 | Initiative Description/ Content                                                                                                                                                                                                                                  | Target Population                            | Setting                                                                    | Initiative Category <sup>1</sup> | Results                                                                                                                                                                                                                                                                                                                                                                                                                             |
|----------------------------------------|------------------------------------------------------------------------------------------------------------------------------------------------------------------------------------------------------------------------------------------------------------------|----------------------------------------------|----------------------------------------------------------------------------|----------------------------------|-------------------------------------------------------------------------------------------------------------------------------------------------------------------------------------------------------------------------------------------------------------------------------------------------------------------------------------------------------------------------------------------------------------------------------------|
| Moeller et al. (2006) <sup>60</sup>    | <p>Critical Pathway</p> <ul style="list-style-type: none"> <li>Criteria for the management and discharge of patients admitted with community-acquired pneumonia</li> </ul>                                                                                       | Patients with community-acquired pneumonia   | <p>Hospital</p> <p>Queen Elizabeth II Health Sciences Centre, 637 beds</p> | Tools and Guidelines             | <ul style="list-style-type: none"> <li>58% of patients with a prolonged length of stay felt they were ready to go home once reaching clinical stability, compared to 92% of patients without a prolonged length of stay</li> <li>Hierarchical Assessment of Balance and Mobility score at clinical stability was significantly associated with physicians' and families' assessment of the patients' discharge readiness</li> </ul> |
| Mur-Veeman et al. (2011) <sup>61</sup> | <p>Buffer Management</p> <ul style="list-style-type: none"> <li>A tool that aims to balance patient flow between hospital and nursing homes by maximizing patient throughput</li> </ul>                                                                          | Bed blockers                                 | Hospital to nursing home (intermediate care department)                    | Tools and Guidelines             | <ul style="list-style-type: none"> <li>The lack of cooperation is an inhibitor of buffer management</li> <li>Efforts should focus on improving cooperation between providers</li> </ul>                                                                                                                                                                                                                                             |
| Niemeijer et al. (2010) <sup>62</sup>  | <p>Lean Six Sigma</p> <ul style="list-style-type: none"> <li>An initiative based on Lean Six Sigma to reduce length of stay, improve discharge procedures, create admission capacity and reduce costs</li> </ul>                                                 | Trauma patients                              | <p>Hospital</p> <p>University Medical Center Groningen, 1339 beds</p>      | Tools and Guidelines             | <ul style="list-style-type: none"> <li>Average length of stay of all patients (surgical and trauma) decreased by 2.9 days post-intervention</li> <li>Average length of stay of trauma patients decreased by 3.3 days</li> </ul>                                                                                                                                                                                                     |
| Panis et al. (2004) <sup>78</sup>      | <p>Dutch Evaluation Protocol</p> <ul style="list-style-type: none"> <li>Altering discharge procedures to assess inappropriate hospital stay, efficiency and patient logistics</li> </ul>                                                                         | Mothers of newborn patients                  | <p>Hospital</p> <p>Maternity unit of 17 beds (715 total hospital beds)</p> | Practice Change                  | <ul style="list-style-type: none"> <li>Reduction in inappropriate patient stay by 6.1%</li> <li>Decrease in length of stay by 0.7 days</li> </ul>                                                                                                                                                                                                                                                                                   |
| Patel et al. (2019) <sup>43</sup>      | <p>Multidisciplinary Team-Based Structure for Discharge Rounds</p> <ul style="list-style-type: none"> <li>Interventions based around multidisciplinary team-based discharge planning rounds (afternoon huddles, pilot teams for physician continuity)</li> </ul> | Dissatisfied patients with delayed discharge | <p>Hospital</p> <p>University of Colorado Hospital, 673 beds</p>           | Information Sharing Live         | <ul style="list-style-type: none"> <li>Higher proportion of patients discharged before noon, lower length of stay and 30-day readmission rate in pilot team compared to control</li> </ul>                                                                                                                                                                                                                                          |

| Author                              | Initiative Description/ Content                                                                                                                                                                                                                  | Target Population                                                                                  | Setting                                                                 | Initiative Category <sup>1</sup>                 | Results                                                                                                                                                                                                                                                                               |
|-------------------------------------|--------------------------------------------------------------------------------------------------------------------------------------------------------------------------------------------------------------------------------------------------|----------------------------------------------------------------------------------------------------|-------------------------------------------------------------------------|--------------------------------------------------|---------------------------------------------------------------------------------------------------------------------------------------------------------------------------------------------------------------------------------------------------------------------------------------|
| Pirani (2010) <sup>44</sup>         | Nurse Participation and Patient and Family Involvement <ul style="list-style-type: none"> <li>• Communication between the nurse and patient/ family to promote continuity of care and coordination of services</li> </ul>                        | Those experiencing delayed discharge                                                               | NR                                                                      | Information Sharing Live                         | <ul style="list-style-type: none"> <li>• Enhancing nurse involvement in the discharge planning process can improve delayed discharges</li> </ul>                                                                                                                                      |
| Qin et al. (2017) <sup>103</sup>    | Simulation Modelling <ul style="list-style-type: none"> <li>• Statistical simulations to explore patient flow and different discharge strategies that could reduce hospital occupancy</li> </ul>                                                 | Varies based on model                                                                              | Hospital<br>Flinders Medical Centre (FMC)                               | Other initiative                                 | <ul style="list-style-type: none"> <li>• Hospital occupancy can be significantly reduced, with a reduction from 281.5 to 22.8 days in the best scenario (instantaneous discharge for 24 hours)</li> </ul>                                                                             |
| Rae et al. (2007) <sup>96</sup>     | Delayed Discharge Project <ul style="list-style-type: none"> <li>• Local authorities are financially responsible (payments) to acute hospital when patients remain in hospital because community care arrangements have not been made</li> </ul> | Acute general medical patients                                                                     | Hospital<br>Dunedin hospital                                            | Infrastructure and Money                         | <ul style="list-style-type: none"> <li>• Mean length of stay decreased by 2.6 days (from 6.5 to 3.9 days)</li> <li>• Decreased costs of service delivery by \$2.4 million</li> <li>• Bed numbers decreased by 24 (from 56 to 32)</li> <li>• No change in readmission rates</li> </ul> |
| Roberts et al. (2013) <sup>50</sup> | Royal Rehabilitation Centre, Sydney, Goal Length of Stay tool <ul style="list-style-type: none"> <li>• A tool that reports the length of stay benchmark figures on an individual patient basis</li> </ul>                                        | Inpatients in 2 units: SRU (stroke rehabilitation unit) or BIRU (Brain Injury Rehabilitation Unit) | Hospital<br>Hampstead Rehabilitation Centre, 128 beds                   | Tools and Guidelines<br>Information Sharing Live | <ul style="list-style-type: none"> <li>• Total discharge delays from the 2 units totaled 6311 days</li> <li>• Length of stay was not decreased</li> <li>• Negative perceptions of the program from staff</li> </ul>                                                                   |
| Sampson et al. (2006) <sup>79</sup> | Diabetes inpatient specialist nurse (DISN) <ul style="list-style-type: none"> <li>• Diabetes management, based on structured group education, for all diabetes inpatients</li> </ul>                                                             | Diabetes inpatients                                                                                | Hospital<br>Norfolk and Norwich University Hospital NHS Trust, 989 beds | Practice Change                                  | <ul style="list-style-type: none"> <li>• Decreased mean excess bed days by 0.7 days (from 1.9 to 1.2)</li> </ul>                                                                                                                                                                      |
| Shah (2007) <sup>97</sup>           | Community Care (Delayed Discharge) Act 2003                                                                                                                                                                                                      | Inpatient - specialties of Geriatric                                                               | Hospitals                                                               | Infrastructure and Money                         | <u>GM:</u> <ul style="list-style-type: none"> <li>• Decreased median and mean length of stay</li> </ul>                                                                                                                                                                               |

| Author                                      | Initiative Description/ Content                                                                                                                                                                                                                                | Target Population                                   | Setting                                                        | Initiative Category <sup>1</sup>                       | Results                                                                                                                                                                                                                                                                                                                                                                                   |
|---------------------------------------------|----------------------------------------------------------------------------------------------------------------------------------------------------------------------------------------------------------------------------------------------------------------|-----------------------------------------------------|----------------------------------------------------------------|--------------------------------------------------------|-------------------------------------------------------------------------------------------------------------------------------------------------------------------------------------------------------------------------------------------------------------------------------------------------------------------------------------------------------------------------------------------|
|                                             | <ul style="list-style-type: none"> <li>Local authorities are financially responsible (payments) to acute hospital when patients remain in hospital because community care arrangements have not been made</li> </ul>                                           | Medicine (GM) and Old Age Psychiatry (OAP) services |                                                                |                                                        | <ul style="list-style-type: none"> <li>Increased number of finished episodes (inpatient discharges)</li> <li>No relationship with number of bed days</li> </ul> <p><u>OAP:</u></p> <ul style="list-style-type: none"> <li>Increased median and mean length of stay</li> <li>Decreased number of finished episodes (inpatient discharges)</li> <li>Increased number of bed days</li> </ul> |
| Sobotka et al. (2017) <sup>51</sup>         | <p>The Hospital-to-Home Transitional Care Program at AHK (Almost Home Kids)</p> <ul style="list-style-type: none"> <li>A program to support and educate families on providing care for medically stable children at home</li> </ul>                            | Pediatric inpatient                                 | <p>Transitional and Respite Centre</p> <p>Almost Home Kids</p> | <p>Practice Change</p> <p>Information Sharing Live</p> | <ul style="list-style-type: none"> <li>2 months following support at AHK, the patient transitioned home to be cared for by his mother and home care team</li> </ul>                                                                                                                                                                                                                       |
| Starr-Hemburrow et al. (2011) <sup>80</sup> | <p>Home First</p> <ul style="list-style-type: none"> <li>A program designed to help keep patients in their homes (with community supports) for as long as possible; focusing on providing access to needed services</li> </ul>                                 | ALC patients                                        | Hospitals                                                      | Practice Change                                        | <ul style="list-style-type: none"> <li>Rate of ALC patients decreased by at least 50% across the region of study</li> </ul>                                                                                                                                                                                                                                                               |
| Sutherland et al. (2013) <sup>45</sup>      | <p>Build More; Integrated Care; and Financial Incentives</p> <ul style="list-style-type: none"> <li>Three strategies to improve ALC impact on hospitals (build more beds, integrated care, financial incentives for post-acute providers)</li> </ul>           | ALC patients                                        | Hospitals                                                      | Information Sharing Recommendation Document            | <ul style="list-style-type: none"> <li>N/A</li> </ul>                                                                                                                                                                                                                                                                                                                                     |
| Taber et al. (2013) <sup>81</sup>           | <p>Comprehensive Interdisciplinary Improvement Initiative</p> <ul style="list-style-type: none"> <li>A program implemented by a multidisciplinary team to improve length of stay, delayed discharges and early readmissions through key initiatives</li> </ul> | Adult kidney transplant recipients                  | <p>Hospital</p> <p>Medical University of South Carolina</p>    | Practice Change                                        | <ul style="list-style-type: none"> <li>Delayed discharges decreased by 14%</li> <li>Readmission rate (7-day) decreased by 50%</li> <li>Acute rejection and infection rates decreased</li> </ul>                                                                                                                                                                                           |
| Udayai et al. (2012) <sup>82</sup>          | Improvement in Discharge Process - Six Sigma                                                                                                                                                                                                                   | NR                                                  | Hospital                                                       | Practice Change                                        | <ul style="list-style-type: none"> <li>Discharge time was decreased by 21% (from 247 to 195 minutes)</li> </ul>                                                                                                                                                                                                                                                                           |

| Author                               | Initiative Description/ Content                                                                                                                                                                                                                        | Target Population                                                             | Setting                                                       | Initiative Category <sup>1</sup>            | Results                                                                                                                                                                                                                                                                                                                                 |
|--------------------------------------|--------------------------------------------------------------------------------------------------------------------------------------------------------------------------------------------------------------------------------------------------------|-------------------------------------------------------------------------------|---------------------------------------------------------------|---------------------------------------------|-----------------------------------------------------------------------------------------------------------------------------------------------------------------------------------------------------------------------------------------------------------------------------------------------------------------------------------------|
|                                      | <ul style="list-style-type: none"> <li>The implementation of strategies using Six Sigma to improve discharge processes (billing hour, patient audits, office executive, priority for discharge, ward boys, discharge process flow)</li> </ul>          |                                                                               |                                                               |                                             | <ul style="list-style-type: none"> <li>Patients had improved satisfaction with the discharge process</li> </ul>                                                                                                                                                                                                                         |
| Williams et al. (2010) <sup>52</sup> | Critical Care Outreach Role <ul style="list-style-type: none"> <li>The implementation of a critical care outreach role to facilitate communication between ICU and ward staff</li> </ul>                                                               | Patients discharged from the ICU                                              | Hospital<br>Royal Perth Hospital, 22-bed ICU (570 total beds) | Practice Change<br>Information Sharing Live | <ul style="list-style-type: none"> <li>Delayed discharges increased by 4% (from 27% to 31%)</li> </ul>                                                                                                                                                                                                                                  |
| Younis et al. (2011) <sup>53</sup>   | Enhanced Recovery Program <ul style="list-style-type: none"> <li>A program post-colorectal surgery to improve stoma management and expedite discharge time</li> </ul>                                                                                  | Patients undergoing anterior resection with the formation of a loop ileostomy | Hospital<br>Single district general hospital                  | Practice Change<br>Information Sharing Live | <ul style="list-style-type: none"> <li>Average length of stay decreased by 6 days</li> <li>Significant decrease in percent of patients experiencing delayed discharge due to independent stoma management</li> </ul>                                                                                                                    |
| <b>Grey Literature</b>               |                                                                                                                                                                                                                                                        |                                                                               |                                                               |                                             |                                                                                                                                                                                                                                                                                                                                         |
| Anonymous (2008) <sup>99</sup>       | Expedited Discharge Fund <ul style="list-style-type: none"> <li>A hospital fund to pay for services that are holding up a patient's discharge (medical equipment, pharmaceuticals, physical and occupational therapy, transportation, etc.)</li> </ul> | Uninsured patients                                                            | Hospital<br>Iowa City, University of Iowa Hospital, 700 beds  | Infrastructure and Finance                  | <ul style="list-style-type: none"> <li>A patient from a rural area was provided with \$40/week for medications and gas to travel to a hospital that provided specialized wound care</li> <li>A social worker found a group home for people with a mental health diagnosis for a patient who had no social support or funding</li> </ul> |
| Anonymous (2010) <sup>46</sup>       | Meetings <ul style="list-style-type: none"> <li>Daily and weekly meetings to discuss issues with patient throughput and strategies for eliminating barriers</li> </ul>                                                                                 | NR                                                                            | Hospital<br>University of Cincinnati Health University        | Information Sharing Live                    | <ul style="list-style-type: none"> <li>Decreased average length of stay by 5.34 hours</li> <li>Increased accuracy of predicting next day discharges from the medical/surgical units by 40%</li> </ul>                                                                                                                                   |



| Author                                                       | Initiative Description/ Content                                                                                                                                                                                                                                                                 | Target Population                                | Setting                                              | Initiative Category <sup>1</sup>            | Results                                                                                                                  |
|--------------------------------------------------------------|-------------------------------------------------------------------------------------------------------------------------------------------------------------------------------------------------------------------------------------------------------------------------------------------------|--------------------------------------------------|------------------------------------------------------|---------------------------------------------|--------------------------------------------------------------------------------------------------------------------------|
|                                                              |                                                                                                                                                                                                                                                                                                 |                                                  | Hospital, 693 beds                                   |                                             |                                                                                                                          |
| Calveley (2007) <sup>83</sup>                                | Tiered Community-Based Services<br>• Three tiers of services to allow for people to be cared for in their own homes or residential units, instead of in hospital                                                                                                                                | NR                                               | Hospital<br><br>Four Seasons Health Care, 18000 beds | Practice Change                             | • NR                                                                                                                     |
| Manzano-Santaella (2009) <sup>100</sup>                      | Payment by Results and Delayed Discharges Act<br>• Payment by Results pays providers a fixed price for each individual case, while with the Delayed Discharges Act, local authorities are financially responsible when patients remain in hospital because community care has not been arranged | NR                                               | NR                                                   | Infrastructure and Finance                  | • Payment by Results and the Delayed Discharges Act are related policies                                                 |
| Krystal (2019) <sup>86</sup>                                 | Southlake@Home<br>• A team designed to meet the patients care needs through partnerships with community and primary care (integrates primary care, hospital care and home and community care to develop a personalized care plan)                                                               | Medically and socially complex and frail elderly | Hospital<br><br>Southlake Regional Health Centre     | Practice Change                             | • Reduction in ALC days (average of 10.6 days)<br>• 1088 ALC days avoided<br>• Positive patient and provider experiences |
| Walker (2011) <sup>2</sup>                                   | Recommendations for Improving Care for the Aging Population<br>• Numerous recommendations to improve ALC in acute and community care ranging from proactively identifying patients at risk of decline in primary care to making hospitals more 'senior friendly.'                               | NR                                               | NR                                                   | Information Sharing Recommendation Document | • NR                                                                                                                     |
| North West Community Care Access Centre (2011) <sup>88</sup> | Wait at Home<br>• Allows seniors to get their healthcare needs from their home through a variety of services for a up to 90 days                                                                                                                                                                | Seniors waiting for LTC placement                | NR                                                   | Practice Change                             | • NR                                                                                                                     |

| Author                                                            | Initiative Description/ Content                                                                                                                                                                                                      | Target Population | Setting  | Initiative Category <sup>1</sup>                                          | Results                                                                                                             |
|-------------------------------------------------------------------|--------------------------------------------------------------------------------------------------------------------------------------------------------------------------------------------------------------------------------------|-------------------|----------|---------------------------------------------------------------------------|---------------------------------------------------------------------------------------------------------------------|
| Toronto Central Community Care Access Centre (2015) <sup>67</sup> | ALC Avoidance Framework<br>• To create a standardized approach to avoid delayed discharges through 12 leadings practices and associated strategies (identifying a date of discharge, engaging with substitute decision makers, etc.) | NR                | NR       | Tools and Guidelines                                                      | • NR                                                                                                                |
| Province of New Brunswick (2017) <sup>92</sup>                    | ALC Collaborative Committee<br>• A committee developed to identify and implement priority strategic initiatives                                                                                                                      | NR                | NR       | Information Sharing Live<br>Practice Change<br>Infrastructure and Finance | • Reduction in percentage of acute hospital days used by patients waiting for discharge from 19.6% to 17.5%         |
| NHS Improvement (2018) <sup>104</sup>                             | SAFER Patient Flow Bundle<br>• A tool to reduce delays for patients on inpatient wards                                                                                                                                               | NR                | NR       | Information Sharing Recommendation Document                               | • Most effective when used with Red2Green days<br>• Supports decision making by allowing staff to visualize plans   |
|                                                                   | Red2Green Days<br>• A tool to reduce unnecessary waiting by patients                                                                                                                                                                 | NR                | NR       |                                                                           | • A board (electronic or white) should act as a focal point for rounds                                              |
|                                                                   | Long-stay Patient Reviews<br>• Weekly reviews of long-stay patients (>20 days), to help address obstacles that are delaying discharge                                                                                                | NR                | NR       |                                                                           | • Weekly long-stay patient reviews can reduce the number of inpatients with a length of stay > 20 days by up to 50% |
|                                                                   | Multiagency Discharge Event (MADE)<br>• Review of individual patient journeys by bringing together senior staff from health and social care                                                                                          | NR                | NR       |                                                                           | • Greatest impact on patients with a length of stay > 6 days                                                        |
| Central East LHIN ALC                                             | Home First<br>• A program designed to help keep patients in their homes (with                                                                                                                                                        | NR                | Hospital | Practice Change                                                           | • Percent of ALC (acute) reduced from 22-28% to 4-6%                                                                |

| Author                                              | Initiative Description/ Content                                                                                                                                                              | Target Population                          | Setting                                                                                                                                  | Initiative Category <sup>1</sup> | Results                                                                                                                   |
|-----------------------------------------------------|----------------------------------------------------------------------------------------------------------------------------------------------------------------------------------------------|--------------------------------------------|------------------------------------------------------------------------------------------------------------------------------------------|----------------------------------|---------------------------------------------------------------------------------------------------------------------------|
| Task Group (2008) <sup>84</sup>                     | community supports) for as long as possible by connecting patients to their needed resources                                                                                                 |                                            | Halton Health Services, 459 beds                                                                                                         |                                  |                                                                                                                           |
| Adams, Care and Repair England (2017) <sup>98</sup> | Home First<br>• A program designed to help keep high needs seniors in their homes (with community supports) for as long as possible and involve the family in care                           | Patients (specifically high needs seniors) | NR                                                                                                                                       | Practice Change                  | • NR                                                                                                                      |
| Shah (2010) <sup>89</sup>                           | Home First<br>• A program designed to help keep patients in their homes (with enhanced home care supports) as they wait for long-term care                                                   | High need seniors (75+)                    | Trillium Health Partners, various community and long-term care organizations                                                             | Practice Change                  | • 2-fold reduction in monthly average of ALC patients<br>• 30.5% reduction in number of ALC to LTC hospital referrals     |
| Joint Improvement Team (2013) <sup>85</sup>         | • NR                                                                                                                                                                                         | ALC patients                               | 9 community hospital corporations, 14 hospital sites and a mental health centre in one Ontario region<br>1642 beds across the facilities | Practice Change                  | • Expected to reduced ALC days by 30% over the next three years                                                           |
| Adams, Care and Repair England (2017) <sup>98</sup> | West of England Care and Repair<br>• Enables older patients to return home from hospital quickly and safely by organizing and repairing home (cleaning, clearing clutter, small adaptations) | Older patients                             | West of England Care and Repair                                                                                                          | Infrastructure and Finance       | • Substantial cost savings in hospital bed days, housing interventions and hospital staff time                            |
| Shah (2010) <sup>89</sup>                           | Home First<br>• A program designed to help keep patients in their homes (with community supports)                                                                                            | Elderly patients                           | Hospital/ community in Mississauga<br>Halton Local Health                                                                                | Practice Change                  | • The equivalent of 35 acute care beds have been saved over 2 years<br>• 250 people have been diverted from LTC placement |

1  
2  
3  
4  
5  
6  
7  
8  
9  
10  
11  
12  
13  
14  
15  
16  
17  
18  
19  
20  
21  
22  
23  
24  
25  
26  
27  
28  
29  
30  
31  
32  
33  
34  
35  
36  
37  
38  
39  
40  
41  
42  
43  
44  
45  
46  
47

| Author                                      | Initiative Description/ Content                                                                                                                                     | Target Population | Setting             | Initiative Category <sup>1</sup> | Results                                                                                                                                                                                                                                                                                                                |
|---------------------------------------------|---------------------------------------------------------------------------------------------------------------------------------------------------------------------|-------------------|---------------------|----------------------------------|------------------------------------------------------------------------------------------------------------------------------------------------------------------------------------------------------------------------------------------------------------------------------------------------------------------------|
|                                             |                                                                                                                                                                     |                   | Integration Network |                                  |                                                                                                                                                                                                                                                                                                                        |
| Joint Improvement Team (2013) <sup>85</sup> | Home First – 10 Actions to Transform Discharge<br>• Actions to improve the pathway from hospital to home focusing on achieving safe, timely and person-centred care | NR                | NR                  | Practice Change                  | • Factors in reducing delays include: identifying estimated date of discharge, using a framework for admissions, transfers and discharges, appointing a provider for coordinating the patients discharge plan, screening for frailty, using transitional and intermediate care services, adopting a home first culture |

873 Abbreviations: NR = not reported; ALC = alternate level of care; ERAS = Enhanced Recovery After Surgery; GM = geriatric medicine; OAP = Old Age  
874 Psychiatry; AHK = almost home kids; LTC = long-term care

## Figures



Figure 1. PRISMA flow diagram of included articles

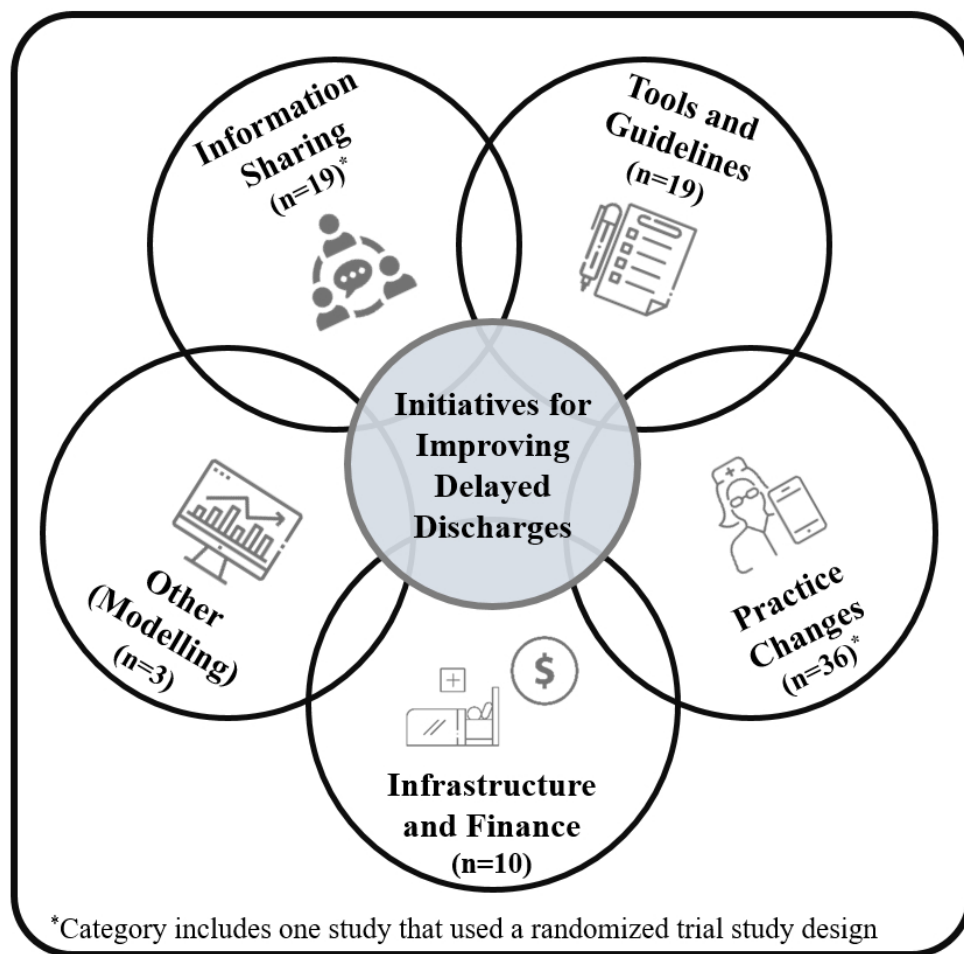

**Figure 2.** Categories of initiatives for improving delayed hospital discharges

Caption: Figure 2. Categories of initiatives for improving delayed hospital discharges

Legend: \*Category includes one study that used a randomized trial study design

145x150mm (150 x 150 DPI)

## Supplementary material

Supplementary Table 1. Preferred Reporting Items for Systematic reviews and Meta-Analyses extension for Scoping Reviews (PRISMA-ScR) Checklist

| SECTION                           | ITEM | PRISMA-ScR CHECKLIST ITEM                                                                                                                                                                                                                                                                                  | REPORTED ON PAGE #    |
|-----------------------------------|------|------------------------------------------------------------------------------------------------------------------------------------------------------------------------------------------------------------------------------------------------------------------------------------------------------------|-----------------------|
| <b>TITLE</b>                      |      |                                                                                                                                                                                                                                                                                                            |                       |
| Title                             | 1    | Identify the report as a scoping review.                                                                                                                                                                                                                                                                   | Page 1                |
| <b>ABSTRACT</b>                   |      |                                                                                                                                                                                                                                                                                                            |                       |
| Structured summary                | 2    | Provide a structured summary that includes (as applicable): background, objectives, eligibility criteria, sources of evidence, charting methods, results, and conclusions that relate to the review questions and objectives.                                                                              | Pages 2-3             |
| <b>INTRODUCTION</b>               |      |                                                                                                                                                                                                                                                                                                            |                       |
| Rationale                         | 3    | Describe the rationale for the review in the context of what is already known. Explain why the review questions/objectives lend themselves to a scoping review approach.                                                                                                                                   | Pages 4-6             |
| Objectives                        | 4    | Provide an explicit statement of the questions and objectives being addressed with reference to their key elements (e.g., population or participants, concepts, and context) or other relevant key elements used to conceptualize the review questions and/or objectives.                                  | Page 6                |
| <b>METHODS</b>                    |      |                                                                                                                                                                                                                                                                                                            |                       |
| Protocol and registration         | 5    | Indicate whether a review protocol exists; state if and where it can be accessed (e.g., a Web address); and if available, provide registration information, including the registration number.                                                                                                             | Page 6                |
| Eligibility criteria              | 6    | Specify characteristics of the sources of evidence used as eligibility criteria (e.g., years considered, language, and publication status), and provide a rationale.                                                                                                                                       | Pages 7-8             |
| Information sources*              | 7    | Describe all information sources in the search (e.g., databases with dates of coverage and contact with authors to identify additional sources), as well as the date the most recent search was executed.                                                                                                  | Page 7                |
| Search                            | 8    | Present the full electronic search strategy for at least 1 database, including any limits used, such that it could be repeated.                                                                                                                                                                            | Supplementary Table 2 |
| Selection of sources of evidence† | 9    | State the process for selecting sources of evidence (i.e., screening and eligibility) included in the scoping review.                                                                                                                                                                                      | Pages 7-8             |
| Data charting process‡            | 10   | Describe the methods of charting data from the included sources of evidence (e.g., calibrated forms or forms that have been tested by the team before their use, and whether data charting was done independently or in duplicate) and any processes for obtaining and confirming data from investigators. | Page 9                |
| Data items                        | 11   | List and define all variables for which data were sought and any assumptions and simplifications made.                                                                                                                                                                                                     | Page 9                |

| SECTION                                                           | ITEM | PRISMA-ScR CHECKLIST ITEM                                                                                                                                                                             | REPORTED ON PAGE #                |
|-------------------------------------------------------------------|------|-------------------------------------------------------------------------------------------------------------------------------------------------------------------------------------------------------|-----------------------------------|
| Critical appraisal of individual sources of evidence <sup>§</sup> | 12   | If done, provide a rationale for conducting a critical appraisal of included sources of evidence; describe the methods used and how this information was used in any data synthesis (if appropriate). | Not applicable                    |
| Synthesis of results                                              | 13   | Describe the methods of handling and summarizing the data that were charted.                                                                                                                          | Pages 9-10                        |
| <b>RESULTS</b>                                                    |      |                                                                                                                                                                                                       |                                   |
| Selection of sources of evidence                                  | 14   | Give numbers of sources of evidence screened, assessed for eligibility, and included in the review, with reasons for exclusions at each stage, ideally using a flow diagram.                          | Page 11, Flow diagram in figure 1 |
| Characteristics of sources of evidence                            | 15   | For each source of evidence, present characteristics for which data were charted and provide the citations.                                                                                           | Pages 10-11                       |
| Critical appraisal within sources of evidence                     | 16   | If done, present data on critical appraisal of included sources of evidence (see item 12).                                                                                                            | Not applicable                    |
| Results of individual sources of evidence                         | 17   | For each included source of evidence, present the relevant data that were charted that relate to the review questions and objectives.                                                                 | Pages 37-62 (tables)              |
| Synthesis of results                                              | 18   | Summarize and/or present the charting results as they relate to the review questions and objectives.                                                                                                  | Pages 11-17                       |
| <b>DISCUSSION</b>                                                 |      |                                                                                                                                                                                                       |                                   |
| Summary of evidence                                               | 19   | Summarize the main results (including an overview of concepts, themes, and types of evidence available), link to the review questions and objectives, and consider the relevance to key groups.       | Pages 18-21                       |
| Limitations                                                       | 20   | Discuss the limitations of the scoping review process.                                                                                                                                                | Page 23                           |
| Conclusions                                                       | 21   | Provide a general interpretation of the results with respect to the review questions and objectives, as well as potential implications and/or next steps.                                             | Page 24                           |
| <b>FUNDING</b>                                                    |      |                                                                                                                                                                                                       |                                   |
| Funding                                                           | 22   | Describe sources of funding for the included sources of evidence, as well as sources of funding for the scoping review. Describe the role of the funders of the scoping review.                       | Page 25                           |

JB1 = Joanna Briggs Institute; PRISMA-ScR = Preferred Reporting Items for Systematic reviews and Meta-Analyses extension for Scoping Reviews.

\* Where *sources of evidence* (see second footnote) are compiled from, such as bibliographic databases, social media platforms, and Web sites.

† A more inclusive/heterogeneous term used to account for the different types of evidence or data sources (e.g., quantitative and/or qualitative research, expert opinion, and policy documents) that may be eligible in a scoping review as opposed to only studies. This is not to be confused with *information sources* (see first footnote).

‡ The frameworks by Arksey and O'Malley (6) and Levac and colleagues (7) and the JBI guidance (4, 5) refer to the process of data extraction in a scoping review as data charting.

§ The process of systematically examining research evidence to assess its validity, results, and relevance before using it to inform a decision. This term is used for items 12 and 19 instead of "risk of bias" (which is more applicable to systematic reviews of interventions) to include and acknowledge the various sources of evidence that may be used in a scoping review (e.g., quantitative and/or qualitative research, expert opinion, and policy document).

From: Tricco AC, Lillie E, Zarin W, O'Brien KK, Colquhoun H, Levac D, et al. PRISMA Extension for Scoping Reviews (PRISMA-ScR): Checklist and Explanation. *Ann Intern Med.* 2018;169:467–473. doi: 10.7326/M18-0850.



Supplementary Table 2. Medline Search Strategy

| #  | Search Term                                                                                                                                                                                               | Results (# of articles) |
|----|-----------------------------------------------------------------------------------------------------------------------------------------------------------------------------------------------------------|-------------------------|
| 1  | (alternat* level* adj2 care).tw,kf                                                                                                                                                                        | 74                      |
| 2  | (bed adj2 (block* or occup* or delay* or capacit* or over?crowd*)).tw,kf                                                                                                                                  | 1756                    |
| 3  | Bed Occupancy/                                                                                                                                                                                            | 2468                    |
| 4  | ((delay* or late* or defer* or post?pon*) adj2 (discharg* or transfer* or handoff* or handover* or releas*)).tw,kf                                                                                        | 10642                   |
| 5  | (delay* or late* or defer* or post?pon*).tw,kf                                                                                                                                                            | 1759017                 |
| 6  | Patient Discharge/                                                                                                                                                                                        | 27462                   |
| 7  | 5 and 6                                                                                                                                                                                                   | 1847                    |
| 8  | (stranded patient).tw,kf                                                                                                                                                                                  | 2                       |
| 9  | 1 or 2 or 3 or 4 or 7 or 8                                                                                                                                                                                | <b>15908</b>            |
| 10 | Health Plan Implementation/ or delivery of health care/ or health care reform/ or patient care management/ or critical pathways/ or guideline/ or practice guideline/ or health policy/                   | 215111                  |
| 11 | (strateg* or intervention* or program* or service* or model* or initiative* or polic* or plan* or re?design* or design* or tool* or system* or guideline* or practice guideline* or best practice*).tw,kf | 9434922                 |
| 12 | ("health plan implementation" or "health?care delivery" or "health?care reform*" or "patient care management" or "critical pathway*").tw,kf                                                               | 8472                    |
| 13 | 10 or 11 or 12                                                                                                                                                                                            | <b>9526394</b>          |
| 14 | 9 and 13                                                                                                                                                                                                  | 8141                    |
| 15 | <b>Limit 14 to (case reports or comment or editorial or letter)</b>                                                                                                                                       | <b>238</b>              |
| 16 | <b>14 not 15</b>                                                                                                                                                                                          | <b>7903</b>             |
| 17 | <b>limit 16 to yr="2004-Current"</b>                                                                                                                                                                      | <b>5519</b>             |

Supplementary Table 3. Definitions and Characteristics of Delayed Discharges from Database Searches

| Author                       | Definition of ALC/ Delayed Discharge                                                                                                        | Reason for Hospitalization                                                                                                                                      | Reason for Delayed Discharge                                                                                                    | Length of Delayed Discharge |
|------------------------------|---------------------------------------------------------------------------------------------------------------------------------------------|-----------------------------------------------------------------------------------------------------------------------------------------------------------------|---------------------------------------------------------------------------------------------------------------------------------|-----------------------------|
| Adlington et al. (2018) [40] | •NR                                                                                                                                         | Psychiatric condition                                                                                                                                           | NR                                                                                                                              | NR                          |
| Ardagh et al. (2011) [41]    | •NR                                                                                                                                         | NR                                                                                                                                                              | Limited access to aged care beds                                                                                                | NR                          |
| Arendts et al. (2013) [42]   | •NR                                                                                                                                         | Cerebrovascular insufficiency, fractured neck of femur, cardiac failure, myocardial ischaemia, respiratory tract infection, chronic airway disease exacerbation | NR                                                                                                                              | NR                          |
| Baumann et al. (2007) [43]   | •Waiting longer in hospital than necessary.                                                                                                 | NR                                                                                                                                                              | NR                                                                                                                              | NR                          |
| Behan (2005) [44]            | •Staying in hospital because community care arrangements have not been made                                                                 | NR                                                                                                                                                              | No arrangements for community care                                                                                              | NR                          |
| Béland et al. (2006) [45]    | •Waiting in hospital for a nursing home placement<br>•Referred to as bed-blockers                                                           | NR                                                                                                                                                              | NR                                                                                                                              | NR                          |
| Blecker et al. (2015) [46]   | •NR                                                                                                                                         | Medical, surgical or other services                                                                                                                             | Delays in care on the weekend                                                                                                   | NR                          |
| Boutette et al. (2018) [47]  | •Patients who are medically stable or stabilizing and are no longer acutely ill                                                             | NR                                                                                                                                                              | NR                                                                                                                              | NR                          |
| Bowen et al. (2014) [48]     | •Remaining in hospital after the patient was considered ready for discharge                                                                 | NR                                                                                                                                                              | Not completing take home prescriptions on time                                                                                  | NR                          |
| Boyd (2017) [49]             | •Increasing length of stay because hospital staff does not discharge patient when once they are identified as medically ready for discharge | NR                                                                                                                                                              | Lack of coordination and communication between physicians and other staff                                                       | NR                          |
| Brankline (2009) [50]        | •NR                                                                                                                                         | NR                                                                                                                                                              | Social workers were without access to the patients' chart, nurses were not available, fax was not received by the care facility | NR                          |

| Author                      | Definition of ALC/ Delayed Discharge                                                                                                                                                                          | Reason for Hospitalization                                          | Reason for Delayed Discharge                                                                                                                                                             | Length of Delayed Discharge                                                                                        |
|-----------------------------|---------------------------------------------------------------------------------------------------------------------------------------------------------------------------------------------------------------|---------------------------------------------------------------------|------------------------------------------------------------------------------------------------------------------------------------------------------------------------------------------|--------------------------------------------------------------------------------------------------------------------|
| Brown et al. (2008) [51]    | •NR                                                                                                                                                                                                           | NR                                                                  | Doctor's order delay, nurse unavailable, bed unavailable, transportation unavailable, waiting for radiography, medical, inadequate pain management, uncontrolled nausea/ vomiting, other | NR                                                                                                                 |
| Burr et al. (2017) [52]     | •Occupying an acute hospital bed, but not requiring the level of resources or services provided in the acute setting                                                                                          | NR                                                                  | NR                                                                                                                                                                                       | NR                                                                                                                 |
| Caminiti et al. (2013) [53] | •Patients who had an unnecessary hospital stay (so signs, symptoms or diagnoses)                                                                                                                              | NR                                                                  | Waiting for tests, lab results, consultations, surgery, transfer to another unit, IV antibiotic treatment not completed, home care services not arranged, lack of transportation, other  | NR                                                                                                                 |
| Chidwick et al. (2017) [54] | •Occupying a hospital bed when acute care treatment has completed or the patient no longer requires the intensity of hospital resources                                                                       | NR                                                                  | NR                                                                                                                                                                                       | NR                                                                                                                 |
| El-Eid et al. (2015) [55]   | •NR                                                                                                                                                                                                           | NR                                                                  | NR                                                                                                                                                                                       | NR                                                                                                                 |
| Gaughan et al. (2015) [56]  | •Occurring when a patient is medically ready for hospital discharge to be cared for in an alternative setting                                                                                                 | NR                                                                  | Unclear                                                                                                                                                                                  | Days of delay over 5 years (monthly average) = 784.9<br><br>Delayed patients over 5 years (monthly average) = 28.4 |
| Graham et al. (2012) [57]   | <ul style="list-style-type: none"> <li>•Patients with morning operations who were not discharged the same day</li> <li>•Patients with afternoon operations who were not discharged within 24 hours</li> </ul> | Laparoscopic cholecystectomy or laparoscopic inguinal hernia repair | Post-operative nausea and vomiting, pain, difficulty voiding, urinary retention, wound haematoma, post-operative hypotension and social reasons                                          | NR                                                                                                                 |

| Author                          | Definition of ALC/ Delayed Discharge                                                                                                                                                                                  | Reason for Hospitalization    | Reason for Delayed Discharge                                                                                                          | Length of Delayed Discharge                                                                              |
|---------------------------------|-----------------------------------------------------------------------------------------------------------------------------------------------------------------------------------------------------------------------|-------------------------------|---------------------------------------------------------------------------------------------------------------------------------------|----------------------------------------------------------------------------------------------------------|
| Gutmanis et al. (2016) [58]     | •NR                                                                                                                                                                                                                   | NR                            | Responsive behaviours                                                                                                                 | NR                                                                                                       |
| Henwood (2006) [59]             | •Delayed discharges (still often referred to by the pejorative term 'bed blocking')                                                                                                                                   | NR                            | NR                                                                                                                                    | NR                                                                                                       |
| Holland et al. (2016) [60]      | •Discharge occurring beyond the time determined by the provider and patient                                                                                                                                           | NR                            | Incomplete dismissal summary, unavailability of discharge prescriptions and miscommunication among team members about discharge plans | Delay time = 23.6 days                                                                                   |
| Katsaliaki et al. (2005) [61]   | •NR                                                                                                                                                                                                                   | NR                            | NR                                                                                                                                    | NR                                                                                                       |
| Lees-Deutsch et al. (2019) [62] | •NR                                                                                                                                                                                                                   | NR                            | Delays in medications being prescribed, outstanding investigations, transportation delays, general practitioner note                  | Mean = 4 hours 51 minutes<br>Range = 50 minutes to 10 hours 22 minutes                                   |
| Levin et al. (2019) [63]        | •Remaining in hospital after the patient was considered medically ready for discharge                                                                                                                                 | NR                            | Lack of appropriate community care or support                                                                                         | Intervention:<br>2013 = 8262 days; 2016 = 3499 days<br><br>Control:<br>2013 = 1354 days; 2016 = 993 days |
| Lian et al. (2008) [64]         | •Delaying discharge for a reason that is not related to the infant's illness following discharge clearance from the medical team                                                                                      | Premature infant              | Minimum weight not achieved, delayed planning or delivery of discharge plan to parents, lack of ownership over discharge planning     | 257 discharge delay days, mean = 7 days/ infant                                                          |
| Maessen et al. (2008) [65]      | •Meeting all discharge criteria (tolerance to food, good pain control, defecation and independence in activities of daily living to preoperative level), but not being discharged at the moment the patient was ready | Elective colorectal resection | Additional wound care, symptoms of an anastomotic leakage                                                                             | Pre: Median = 2, range = 0–17 days<br>Post: median = 1, range = 0–9 days                                 |

| Author                      | Definition of ALC/ Delayed Discharge                                                                                                                                                                                                                                                                       | Reason for Hospitalization                                                                                                                               | Reason for Delayed Discharge                                                                                                                                                                                                                                                                               | Length of Delayed Discharge                                                                                                                  |
|-----------------------------|------------------------------------------------------------------------------------------------------------------------------------------------------------------------------------------------------------------------------------------------------------------------------------------------------------|----------------------------------------------------------------------------------------------------------------------------------------------------------|------------------------------------------------------------------------------------------------------------------------------------------------------------------------------------------------------------------------------------------------------------------------------------------------------------|----------------------------------------------------------------------------------------------------------------------------------------------|
| Mahant et al. (2008) [66]   | <ul style="list-style-type: none"> <li>• Non-qualified hospital days occur when the Medical Care Appropriateness Protocol tool is applied to a patient and the criteria has not been met</li> </ul>                                                                                                        | NR - general pediatric inpatient unit                                                                                                                    | Waiting for tests, IV antibiotics not completed, receiving nutrition, still under observation/ investigation, waiting for rehabilitation/ long-term care bed, treatment tapering not complete, needs education, psychosocial/ economic, administrative delays/ documents not complete, waiting for consult | Non-qualified days:<br>Preintervention – 3859 of 8228 days<br>Intervention – 2413 of 7246 days                                               |
| Mahto et al. (2009) [67]    | <ul style="list-style-type: none"> <li>• Involving the diabetes team late, resulting in a prolonged length of stay</li> </ul>                                                                                                                                                                              | Diabetes or other general medicine admission                                                                                                             | NR                                                                                                                                                                                                                                                                                                         | NR                                                                                                                                           |
| Maloney et al. (2007) [68]  | <ul style="list-style-type: none"> <li>• NR</li> </ul>                                                                                                                                                                                                                                                     | NR                                                                                                                                                       | NR                                                                                                                                                                                                                                                                                                         | NR                                                                                                                                           |
| Manville et al. (2014) [69] | <ul style="list-style-type: none"> <li>• Needing more supports before discharge or delayed recovery of elderly hospitalized patients</li> </ul>                                                                                                                                                            | Dementia, delirium, confusion, fall, fracture, injury, frailty or failure to thrive, infection, cardiac condition, psychiatric or neurological condition | Dementia, immobility, falls or fractures post-rehabilitation, fragility, caregiver burden, cancer                                                                                                                                                                                                          | NR                                                                                                                                           |
| Meehan et al. (2018) [70]   | <ul style="list-style-type: none"> <li>• Requiring additional supports for care needs after patients are identified as ‘clinically optimized’</li> </ul>                                                                                                                                                   | NR                                                                                                                                                       | NR                                                                                                                                                                                                                                                                                                         | NR                                                                                                                                           |
| Moeller et al. (2006) [71]  | <ul style="list-style-type: none"> <li>• Discharge that occurs after a patient has been identified as ready for discharge (normalized vital signs, baseline status of lung function and oxygenation, negative blood culture, appropriate blood cell count, stabilization of comorbid illnesses)</li> </ul> | Community acquired pneumonia                                                                                                                             | Additional tests required, patients felt unready for discharge, delay in acquiring home support, nausea, concerns with treatment compliance                                                                                                                                                                | Discharged at time of stability:<br>mean LoS = 6.7 days<br>median LoS = 5.5<br><br>Increased LoS:<br>mean LoS = 7.9 days<br>median LoS = 7.5 |

| Author                        | Definition of ALC/ Delayed Discharge                                                                                                                                    | Reason for Hospitalization  | Reason for Delayed Discharge                                                                                                                                                                                                                  | Length of Delayed Discharge                                                            |
|-------------------------------|-------------------------------------------------------------------------------------------------------------------------------------------------------------------------|-----------------------------|-----------------------------------------------------------------------------------------------------------------------------------------------------------------------------------------------------------------------------------------------|----------------------------------------------------------------------------------------|
| Mur-Veeman et al. (2011) [72] | <ul style="list-style-type: none"> <li>Waiting to be admitted to next care setting (nursing home or home care) after completing treatment in current setting</li> </ul> | NR                          | NR                                                                                                                                                                                                                                            | NR                                                                                     |
| Niemeijer et al. (2010) [73]  | <ul style="list-style-type: none"> <li>NR</li> </ul>                                                                                                                    | Trauma, surgery, other      | Waiting for rehabilitation facility or nursing home, delays in discharge planning, waiting for an operation or diagnostic result, other factors                                                                                               | NR                                                                                     |
| Panis et al. (2004) [74]      | <ul style="list-style-type: none"> <li>Occurring from inappropriate hospital stays (when there is no medical indication for a hospital stay to continue)</li> </ul>     | Childbirth                  | Insurance companies not covering maternity care at home                                                                                                                                                                                       | Inappropriate days of stay:<br>2000: 72 (13.3%)<br>2001: 64 (14.7%)<br>2002: 30 (7.2%) |
| Patel et al. (2019) [75]      | <ul style="list-style-type: none"> <li>Discharging patients when it is medically safe to do so</li> </ul>                                                               | NR                          | Lack of communication between the multidisciplinary team members, incomplete discharge plans                                                                                                                                                  | NR                                                                                     |
| Pirani (2010) [76]            | <ul style="list-style-type: none"> <li>Waiting for discharge process after identified as medically and physically ready for discharge</li> </ul>                        | NR                          | Individual factors (personal choice, age, emotional disposition, support from family/ friends), medical factors (new medical problems), organizational factors (lack of home support, unavailability of nursing or rehabilitation facilities) | NR                                                                                     |
| Qin et al. (2017) [77]        | <ul style="list-style-type: none"> <li>Occupying a hospital bed for non-medical reasons after being identified as medically stable</li> </ul>                           | NR                          | NR                                                                                                                                                                                                                                            | NR                                                                                     |
| Rae et al. (2007) [78]        | <ul style="list-style-type: none"> <li>NR</li> </ul>                                                                                                                    | NR – acute general medicine | Lack of early family consultation, family refusal to take patient home, inadequate discharge planning, no discharge on Fridays or the weekend, staff                                                                                          | NR                                                                                     |

| Author                             | Definition of ALC/ Delayed Discharge                                                                | Reason for Hospitalization                                                                                            | Reason for Delayed Discharge                                                                                                                                                                                                                                                              | Length of Delayed Discharge                                                                                                |
|------------------------------------|-----------------------------------------------------------------------------------------------------|-----------------------------------------------------------------------------------------------------------------------|-------------------------------------------------------------------------------------------------------------------------------------------------------------------------------------------------------------------------------------------------------------------------------------------|----------------------------------------------------------------------------------------------------------------------------|
|                                    |                                                                                                     |                                                                                                                       | too busy to discharge all patients, adverse events, miscommunication across disciplines, too many patients on staffs' care, not all conditions dealt with, IV medications not transferred to oral, lack of diagnosis, waiting for rehabilitation services/ consultations, waiting for bed |                                                                                                                            |
| Roberts et al. (2013) [79]         | •NR                                                                                                 | Stroke, brain dysfunction, major multiple trauma, spinal cord dysfunction, other neurological condition or impairment | Cognitive/ psychological issues, waiting for home modifications, waiting for community services, lack of accommodation, waiting for nursing home placement, waiting for additional medication or surgical procedure                                                                       | Stroke Unit: Total additional days = 1821, range = 1-330<br>Brain Injury Unit: Total additional days = 4490, range = 1-673 |
| Sampson et al. (2006) [80]         | •NR                                                                                                 | NR                                                                                                                    | NR                                                                                                                                                                                                                                                                                        | NR                                                                                                                         |
| Shah (2007) [81]                   | •NR                                                                                                 | NR                                                                                                                    | Community services not arranged, patient's needs not assessed                                                                                                                                                                                                                             | NR                                                                                                                         |
| Sobotka et al. (2017) [82]         | •Remaining in hospital after reaching medical stability because of social or resource complications | Ventilator and tracheostomy management                                                                                | NR                                                                                                                                                                                                                                                                                        | NR                                                                                                                         |
| Starr-Hemburrow et al. (2011) [83] | •Waiting in a care setting for the appropriate level of care                                        | NR                                                                                                                    | NR                                                                                                                                                                                                                                                                                        | NR                                                                                                                         |
| Sutherland et al. (2013) [84]      | •Waiting for the appropriate post-acute care setting after being identified as ready for discharge  | NR                                                                                                                    | NR                                                                                                                                                                                                                                                                                        | NR                                                                                                                         |
| Taber et al. (2013) [85]           | •NR                                                                                                 | Kidney transplant                                                                                                     | Lack of medication education                                                                                                                                                                                                                                                              | NR                                                                                                                         |

1  
2  
3  
4  
5  
6  
7  
8  
9  
10  
11  
12  
13  
14  
15  
16  
17  
18  
19  
20  
21  
22  
23  
24  
25  
26  
27  
28  
29  
30  
31  
32  
33  
34  
35  
36  
37  
38  
39  
40  
41  
42  
43  
44  
45  
46  
47

| Author                      | Definition of ALC/ Delayed Discharge                                                          | Reason for Hospitalization                                          | Reason for Delayed Discharge                                                                                             | Length of Delayed Discharge                                                                         |
|-----------------------------|-----------------------------------------------------------------------------------------------|---------------------------------------------------------------------|--------------------------------------------------------------------------------------------------------------------------|-----------------------------------------------------------------------------------------------------|
| Udayai et al. (2012) [86]   | •NR                                                                                           | NR                                                                  | Lack of nurses or housekeepers, delayed manual delivery of papers, communication barriers, unavailability of wheelchairs | NR                                                                                                  |
| Williams et al. (2010) [87] | •Relocating the patient after 8 hours of being identified as ready for discharge from the ICU | Cardiac surgery, trauma, sepsis, other medical condition or surgery | No available bed, medical concern, lack of suitable accommodation, staff shortage, poor skill mix                        | 2001: median delay time = 29 hours (max=26 days)<br>2008: median delay time = 25 hours (max=8 days) |
| Younis et al. (2011) [88]   | •Remaining in hospital for longer than 5 days                                                 | Stoma formation following colorectal surgery                        | Delayed independent management of ileostomy                                                                              | Greater than 5 days                                                                                 |



Preferred Reporting Items for Systematic reviews and Meta-Analyses extension for Scoping Reviews (PRISMA-ScR) Checklist

| SECTION                           | ITEM | PRISMA-ScR CHECKLIST ITEM                                                                                                                                                                                                                                                                                  | REPORTED ON PAGE #    |
|-----------------------------------|------|------------------------------------------------------------------------------------------------------------------------------------------------------------------------------------------------------------------------------------------------------------------------------------------------------------|-----------------------|
| <b>TITLE</b>                      |      |                                                                                                                                                                                                                                                                                                            |                       |
| Title                             | 1    | Identify the report as a scoping review.                                                                                                                                                                                                                                                                   | Page 1                |
| <b>ABSTRACT</b>                   |      |                                                                                                                                                                                                                                                                                                            |                       |
| Structured summary                | 2    | Provide a structured summary that includes (as applicable): background, objectives, eligibility criteria, sources of evidence, charting methods, results, and conclusions that relate to the review questions and objectives.                                                                              | Pages 2-3             |
| <b>INTRODUCTION</b>               |      |                                                                                                                                                                                                                                                                                                            |                       |
| Rationale                         | 3    | Describe the rationale for the review in the context of what is already known. Explain why the review questions/objectives lend themselves to a scoping review approach.                                                                                                                                   | Pages 4-6             |
| Objectives                        | 4    | Provide an explicit statement of the questions and objectives being addressed with reference to their key elements (e.g., population or participants, concepts, and context) or other relevant key elements used to conceptualize the review questions and/or objectives.                                  | Page 6                |
| <b>METHODS</b>                    |      |                                                                                                                                                                                                                                                                                                            |                       |
| Protocol and registration         | 5    | Indicate whether a review protocol exists; state if and where it can be accessed (e.g., a Web address); and if available, provide registration information, including the registration number.                                                                                                             | Page 6                |
| Eligibility criteria              | 6    | Specify characteristics of the sources of evidence used as eligibility criteria (e.g., years considered, language, and publication status), and provide a rationale.                                                                                                                                       | Pages 7-8             |
| Information sources*              | 7    | Describe all information sources in the search (e.g., databases with dates of coverage and contact with authors to identify additional sources), as well as the date the most recent search was executed.                                                                                                  | Page 7                |
| Search                            | 8    | Present the full electronic search strategy for at least 1 database, including any limits used, such that it could be repeated.                                                                                                                                                                            | Supplementary Table 2 |
| Selection of sources of evidence† | 9    | State the process for selecting sources of evidence (i.e., screening and eligibility) included in the scoping review.                                                                                                                                                                                      | Pages 7-8             |
| Data charting process‡            | 10   | Describe the methods of charting data from the included sources of evidence (e.g., calibrated forms or forms that have been tested by the team before their use, and whether data charting was done independently or in duplicate) and any processes for obtaining and confirming data from investigators. | Page 9                |
| Data items                        | 11   | List and define all variables for which data were sought and any assumptions and simplifications made.                                                                                                                                                                                                     | Page 9                |
| Critical appraisal of individual  | 12   | If done, provide a rationale for conducting a critical appraisal of included sources of evidence; describe                                                                                                                                                                                                 | Not applicable        |

| SECTION                                       | ITEM | PRISMA-ScR CHECKLIST ITEM                                                                                                                                                                       | REPORTED ON PAGE #                |
|-----------------------------------------------|------|-------------------------------------------------------------------------------------------------------------------------------------------------------------------------------------------------|-----------------------------------|
| sources of evidence§                          |      | the methods used and how this information was used in any data synthesis (if appropriate).                                                                                                      |                                   |
| Synthesis of results                          | 13   | Describe the methods of handling and summarizing the data that were charted.                                                                                                                    | Pages 9-10                        |
| <b>RESULTS</b>                                |      |                                                                                                                                                                                                 |                                   |
| Selection of sources of evidence              | 14   | Give numbers of sources of evidence screened, assessed for eligibility, and included in the review, with reasons for exclusions at each stage, ideally using a flow diagram.                    | Page 11, Flow diagram in figure 1 |
| Characteristics of sources of evidence        | 15   | For each source of evidence, present characteristics for which data were charted and provide the citations.                                                                                     | Pages 10-11                       |
| Critical appraisal within sources of evidence | 16   | If done, present data on critical appraisal of included sources of evidence (see item 12).                                                                                                      | Not applicable                    |
| Results of individual sources of evidence     | 17   | For each included source of evidence, present the relevant data that were charted that relate to the review questions and objectives.                                                           | Pages 37-62 (tables)              |
| Synthesis of results                          | 18   | Summarize and/or present the charting results as they relate to the review questions and objectives.                                                                                            | Pages 11-17                       |
| <b>DISCUSSION</b>                             |      |                                                                                                                                                                                                 |                                   |
| Summary of evidence                           | 19   | Summarize the main results (including an overview of concepts, themes, and types of evidence available), link to the review questions and objectives, and consider the relevance to key groups. | Pages 18-21                       |
| Limitations                                   | 20   | Discuss the limitations of the scoping review process.                                                                                                                                          | Page 23                           |
| Conclusions                                   | 21   | Provide a general interpretation of the results with respect to the review questions and objectives, as well as potential implications and/or next steps.                                       | Page 24                           |
| <b>FUNDING</b>                                |      |                                                                                                                                                                                                 |                                   |
| Funding                                       | 22   | Describe sources of funding for the included sources of evidence, as well as sources of funding for the scoping review. Describe the role of the funders of the scoping review.                 | Page 25                           |

JBI = Joanna Briggs Institute; PRISMA-ScR = Preferred Reporting Items for Systematic reviews and Meta-Analyses extension for Scoping Reviews.

\* Where *sources of evidence* (see second footnote) are compiled from, such as bibliographic databases, social media platforms, and Web sites.

† A more inclusive/heterogeneous term used to account for the different types of evidence or data sources (e.g., quantitative and/or qualitative research, expert opinion, and policy documents) that may be eligible in a scoping review as opposed to only studies. This is not to be confused with *information sources* (see first footnote).

‡ The frameworks by Arksey and O'Malley (6) and Levac and colleagues (7) and the JBI guidance (4, 5) refer to the process of data extraction in a scoping review as data charting.

§ The process of systematically examining research evidence to assess its validity, results, and relevance before using it to inform a decision. This term is used for items 12 and 19 instead of "risk of bias" (which is more applicable to systematic reviews of interventions) to include and acknowledge the various sources of evidence that may be used in a scoping review (e.g., quantitative and/or qualitative research, expert opinion, and policy document).

From: Tricco AC, Lillie E, Zarin W, O'Brien KK, Colquhoun H, Levac D, et al. PRISMA Extension for Scoping Reviews (PRISMA-ScR): Checklist and Explanation. *Ann Intern Med.* 2018;169:467–473. doi: 10.7326/M18-0850.
